# Supplementary material for: Intersection of the Orphan G Protein-Coupled Receptor, GPR19, with the Aging Process
Source: MDPI journal article supplement (doi:10.3390/ijms232113598), 2022-11-06
Supplement: s1 [file s1]

**Table S1.** Gene Expression Omnibus (GEO) GPR19 associated datasets demonstrating upregulation. The specific GEO datasets (GSE) are indicated and the presence of the associated Gene Symbol for a transcript measured is shown in the different columns.

| Gene Symbol | GSE8157 | GSE31102 | GSE49506 | GSE10309 | GSE12881 | GSE31812 | GSE9754 | Common Sets |
|-------------|---------|----------|----------|----------|----------|----------|---------|-------------|
| gpr19       | 1       | 1        | 1        | 1        | 1        | 1        | 1       | 7           |
| fasn        | 1       | 1        | 1        | 0        | 1        | 1        | 1       | 6           |
| flcn        | 1       | 1        | 1        | 0        | 1        | 1        | 1       | 6           |
| h6pd        | 1       | 1        | 1        | 1        | 1        | 0        | 1       | 6           |
| tmtc4       | 1       | 1        | 1        | 0        | 1        | 1        | 1       | 6           |
| fkbp11      | 1       | 1        | 1        | 1        | 1        | 0        | 1       | 6           |
| acly        | 1       | 1        | 1        | 0        | 1        | 1        | 1       | 6           |
| nampt       | 1       | 1        | 1        | 0        | 1        | 1        | 1       | 6           |
| tes         | 1       | 1        | 1        | 0        | 1        | 1        | 1       | 6           |
| cab39l      | 1       | 1        | 0        | 1        | 1        | 1        | 1       | 6           |
| strbp       | 1       | 1        | 1        | 0        | 1        | 1        | 1       | 6           |
| dixdc1      | 1       | 0        | 1        | 1        | 1        | 1        | 1       | 6           |
| ddx21       | 1       | 1        | 1        | 0        | 1        | 1        | 1       | 6           |
| rif1        | 1       | 1        | 1        | 0        | 1        | 0        | 1       | 5           |
| tfrc        | 1       | 1        | 1        | 0        | 1        | 0        | 1       | 5           |
| oxr1        | 1       | 1        | 1        | 0        | 1        | 0        | 1       | 5           |
| n4bp2l1     | 1       | 1        | 1        | 0        | 1        | 0        | 1       | 5           |
| ncapg       | 1       | 1        | 1        | 0        | 1        | 1        | 0       | 5           |
| pawr        | 1       | 1        | 1        | 0        | 1        | 1        | 0       | 5           |
| ebp         | 1       | 1        | 1        | 0        | 0        | 1        | 1       | 5           |
| glrb        | 1       | 1        | 1        | 0        | 1        | 1        | 0       | 5           |
| ndufaf4     | 1       | 1        | 1        | 0        | 1        | 0        | 1       | 5           |
| acsl4       | 1       | 1        | 1        | 0        | 1        | 1        | 0       | 5           |
| slc35b4     | 1       | 1        | 1        | 0        | 1        | 1        | 0       | 5           |
| ica1        | 1       | 1        | 0        | 0        | 1        | 1        | 1       | 5           |
| proser2     | 1       | 0        | 1        | 1        | 1        | 0        | 1       | 5           |
| sox4        | 1       | 1        | 0        | 0        | 1        | 1        | 1       | 5           |
| wdr12       | 1       | 1        | 1        | 0        | 0        | 1        | 1       | 5           |
| hnmpd       | 1       | 1        | 1        | 0        | 0        | 1        | 1       | 5           |
| sesn3       | 1       | 1        | 0        | 0        | 1        | 1        | 1       | 5           |
| nav1        | 1       | 0        | 1        | 1        | 1        | 0        | 1       | 5           |
| mcm10       | 1       | 1        | 1        | 0        | 0        | 1        | 1       | 5           |
| ccnd2       | 1       | 1        | 1        | 0        | 1        | 0        | 1       | 5           |
| tfpi        | 1       | 0        | 1        | 1        | 1        | 1        | 0       | 5           |
| gar1        | 1       | 1        | 1        | 0        | 1        | 0        | 1       | 5           |
| mtap        | 1       | 1        | 1        | 0        | 1        | 0        | 1       | 5           |
| naspi       | 1       | 1        | 1        | 0        | 1        | 1        | 0       | 5           |
| dhfr        | 1       | 1        | 0        | 0        | 1        | 1        | 1       | 5           |
| serp1       | 1       | 1        | 1        | 0        | 0        | 1        | 1       | 5           |
| xbp1        | 1       | 1        | 1        | 0        | 1        | 1        | 0       | 5           |

|         |   |   |   |   |   |   |   |   |
|---------|---|---|---|---|---|---|---|---|
| gnl3    | 1 | 1 | 1 | 0 | 0 | 1 | 1 | 5 |
| sept6   | 1 | 1 | 1 | 0 | 1 | 1 | 0 | 5 |
| nusap1  | 1 | 1 | 1 | 0 | 0 | 1 | 1 | 5 |
| nop58   | 1 | 1 | 0 | 0 | 1 | 1 | 1 | 5 |
| rilpl1  | 1 | 1 | 1 | 0 | 0 | 1 | 1 | 5 |
| sqle    | 1 | 1 | 1 | 0 | 0 | 1 | 1 | 5 |
| cbx5    | 1 | 1 | 1 | 1 | 0 | 0 | 1 | 5 |
| wdr4    | 1 | 1 | 1 | 0 | 0 | 1 | 1 | 5 |
| fktn    | 1 | 1 | 0 | 0 | 1 | 1 | 1 | 5 |
| zbtb20  | 1 | 1 | 1 | 0 | 1 | 0 | 1 | 5 |
| aldh1l2 | 1 | 0 | 1 | 0 | 1 | 1 | 1 | 5 |
| srr     | 1 | 1 | 1 | 0 | 1 | 0 | 1 | 5 |
| dpvd    | 1 | 1 | 1 | 0 | 1 | 1 | 0 | 5 |
| skp2    | 1 | 1 | 0 | 0 | 1 | 1 | 1 | 5 |
| ldlr    | 1 | 1 | 1 | 0 | 1 | 1 | 0 | 5 |
| hk2     | 1 | 0 | 1 | 0 | 1 | 1 | 1 | 5 |
| prmt1   | 1 | 1 | 1 | 0 | 1 | 0 | 1 | 5 |
| larp6   | 1 | 0 | 0 | 1 | 1 | 1 | 1 | 5 |
| nfib    | 1 | 1 | 0 | 0 | 1 | 1 | 1 | 5 |
| slc30a4 | 1 | 1 | 0 | 0 | 1 | 1 | 1 | 5 |
| cttn    | 1 | 1 | 0 | 1 | 1 | 0 | 1 | 5 |
| thbs1   | 1 | 0 | 1 | 1 | 1 | 1 | 0 | 5 |
| mapre2  | 1 | 1 | 0 | 1 | 1 | 0 | 1 | 5 |
| pdia6   | 1 | 1 | 1 | 0 | 1 | 0 | 1 | 5 |
| coa7    | 1 | 1 | 1 | 0 | 1 | 0 | 1 | 5 |
| myc     | 1 | 0 | 1 | 0 | 1 | 1 | 1 | 5 |
| fkbp4   | 1 | 0 | 1 | 0 | 1 | 1 | 1 | 5 |
| sars    | 1 | 1 | 1 | 0 | 1 | 1 | 0 | 5 |
| gpsm2   | 1 | 0 | 1 | 0 | 1 | 1 | 1 | 5 |
| stmn1   | 1 | 1 | 0 | 0 | 1 | 1 | 1 | 5 |
| svil    | 1 | 1 | 1 | 0 | 0 | 1 | 1 | 5 |
| farsb   | 1 | 1 | 1 | 0 | 0 | 1 | 1 | 5 |
| idi1    | 1 | 1 | 0 | 0 | 1 | 1 | 1 | 5 |
| hnrnpab | 1 | 1 | 1 | 0 | 1 | 0 | 1 | 5 |
| pmp22   | 1 | 1 | 0 | 0 | 1 | 1 | 1 | 5 |
| syt11   | 1 | 1 | 1 | 0 | 1 | 1 | 0 | 5 |
| cad     | 1 | 1 | 1 | 0 | 1 | 0 | 1 | 5 |
| syncrip | 1 | 1 | 1 | 0 | 1 | 0 | 1 | 5 |
| vars    | 1 | 1 | 0 | 0 | 1 | 1 | 1 | 5 |
| ctsb    | 1 | 1 | 1 | 1 | 1 | 0 | 0 | 5 |
| crebrf  | 1 | 1 | 1 | 0 | 0 | 1 | 1 | 5 |
| stc2    | 1 | 1 | 0 | 1 | 1 | 1 | 0 | 5 |
| vdr     | 1 | 0 | 1 | 0 | 1 | 1 | 1 | 5 |
| chpt1   | 1 | 1 | 1 | 0 | 1 | 1 | 0 | 5 |
| rabgap1 | 1 | 1 | 0 | 0 | 1 | 1 | 1 | 5 |

|         |   |   |   |   |   |   |   |   |
|---------|---|---|---|---|---|---|---|---|
| ddx54   | 1 | 1 | 1 | 0 | 1 | 0 | 1 | 5 |
| stc1    | 1 | 1 | 1 | 0 | 0 | 1 | 1 | 5 |
| maoa    | 1 | 1 | 1 | 0 | 1 | 1 | 0 | 5 |
| hsph1   | 1 | 1 | 1 | 0 | 0 | 1 | 1 | 5 |
| tpd52   | 1 | 1 | 1 | 0 | 1 | 0 | 1 | 5 |
| eif3b   | 1 | 1 | 1 | 0 | 1 | 0 | 1 | 5 |
| bclaf1  | 1 | 1 | 0 | 0 | 1 | 1 | 1 | 5 |
| pes1    | 1 | 1 | 1 | 0 | 1 | 0 | 1 | 5 |
| cct5    | 1 | 1 | 1 | 0 | 1 | 0 | 1 | 5 |
| higd1a  | 1 | 1 | 1 | 0 | 1 | 0 | 1 | 5 |
| mkks    | 1 | 1 | 0 | 0 | 1 | 1 | 1 | 5 |
| cyb5b   | 1 | 1 | 1 | 0 | 1 | 0 | 1 | 5 |
| dhcr24  | 1 | 1 | 0 | 0 | 1 | 1 | 1 | 5 |
| dlgap5  | 1 | 1 | 1 | 0 | 0 | 1 | 1 | 5 |
| txn14a  | 1 | 1 | 1 | 0 | 1 | 0 | 1 | 5 |
| abhd17c | 1 | 1 | 1 | 0 | 1 | 0 | 1 | 5 |
| socs2   | 1 | 1 | 1 | 0 | 1 | 0 | 1 | 5 |
| pnp     | 1 | 1 | 1 | 0 | 1 | 1 | 0 | 5 |
| wars    | 1 | 1 | 1 | 0 | 0 | 1 | 1 | 5 |
| sfr1    | 1 | 1 | 1 | 1 | 0 | 1 | 0 | 5 |
| slc1a3  | 1 | 0 | 1 | 0 | 1 | 1 | 1 | 5 |
| upp1    | 1 | 1 | 0 | 1 | 0 | 1 | 1 | 5 |
| kpna2   | 1 | 1 | 0 | 0 | 1 | 1 | 1 | 5 |
| cdk1    | 1 | 1 | 0 | 0 | 1 | 1 | 1 | 5 |
| cstf3   | 1 | 1 | 0 | 0 | 1 | 1 | 1 | 5 |
| bves    | 1 | 1 | 1 | 0 | 0 | 1 | 1 | 5 |
| mcl1    | 1 | 1 | 1 | 0 | 0 | 1 | 1 | 5 |
| agap1   | 1 | 1 | 1 | 0 | 1 | 0 | 1 | 5 |
| adat2   | 1 | 0 | 1 | 0 | 1 | 1 | 1 | 5 |
| atf3    | 1 | 1 | 0 | 0 | 1 | 1 | 1 | 5 |
| tbcd15  | 1 | 1 | 0 | 0 | 1 | 1 | 1 | 5 |
| mydgf   | 1 | 1 | 1 | 0 | 1 | 0 | 1 | 5 |
| aspm    | 1 | 1 | 1 | 0 | 0 | 1 | 1 | 5 |
| mina    | 1 | 1 | 1 | 0 | 0 | 1 | 1 | 5 |
| cycs    | 1 | 1 | 1 | 0 | 1 | 0 | 1 | 5 |
| rnf38   | 1 | 1 | 1 | 0 | 1 | 1 | 0 | 5 |
| tspan13 | 0 | 1 | 1 | 1 | 1 | 1 | 0 | 5 |
| hspa9   | 0 | 1 | 1 | 0 | 1 | 1 | 1 | 5 |
| itga6   | 0 | 1 | 1 | 0 | 1 | 1 | 1 | 5 |
| cdkn1a  | 0 | 1 | 1 | 1 | 1 | 1 | 0 | 5 |
| srxn1   | 0 | 1 | 1 | 0 | 1 | 1 | 1 | 5 |
| fam69b  | 1 | 1 | 0 | 0 | 1 | 0 | 1 | 4 |
| nudt13  | 1 | 1 | 1 | 0 | 1 | 0 | 0 | 4 |
| tpcn1   | 1 | 1 | 1 | 0 | 0 | 0 | 1 | 4 |
| diexf   | 1 | 0 | 1 | 0 | 0 | 1 | 1 | 4 |

|          |   |   |   |   |   |   |   |   |
|----------|---|---|---|---|---|---|---|---|
| polr3g   | 1 | 1 | 1 | 0 | 1 | 0 | 0 | 4 |
| jund     | 1 | 1 | 1 | 0 | 1 | 0 | 0 | 4 |
| tpm4     | 1 | 1 | 0 | 0 | 1 | 1 | 0 | 4 |
| tmem134  | 1 | 1 | 1 | 0 | 1 | 0 | 0 | 4 |
| stard10  | 1 | 1 | 1 | 0 | 1 | 0 | 0 | 4 |
| abcb6    | 1 | 1 | 0 | 0 | 0 | 1 | 1 | 4 |
| rasa3    | 1 | 1 | 0 | 0 | 1 | 1 | 0 | 4 |
| dbp      | 1 | 1 | 1 | 0 | 0 | 0 | 1 | 4 |
| cask     | 1 | 1 | 0 | 0 | 1 | 1 | 0 | 4 |
| fam20c   | 1 | 1 | 0 | 0 | 1 | 0 | 1 | 4 |
| gsn      | 1 | 0 | 1 | 0 | 1 | 0 | 1 | 4 |
| slc9a3r1 | 1 | 1 | 0 | 0 | 1 | 0 | 1 | 4 |
| thra     | 1 | 1 | 0 | 0 | 1 | 0 | 1 | 4 |
| fam132a  | 1 | 1 | 0 | 0 | 1 | 0 | 1 | 4 |
| anpep    | 1 | 0 | 0 | 0 | 1 | 1 | 1 | 4 |
| hipk2    | 1 | 1 | 1 | 0 | 1 | 0 | 0 | 4 |
| letm1    | 1 | 1 | 1 | 0 | 1 | 0 | 0 | 4 |
| abca7    | 1 | 1 | 1 | 0 | 1 | 0 | 0 | 4 |
| st3gal3  | 1 | 1 | 0 | 0 | 1 | 1 | 0 | 4 |
| cbfa2t3  | 1 | 1 | 0 | 0 | 1 | 0 | 1 | 4 |
| arhgdia  | 1 | 1 | 1 | 0 | 0 | 0 | 1 | 4 |
| f11r     | 1 | 1 | 1 | 0 | 1 | 0 | 0 | 4 |
| sorbs1   | 1 | 1 | 0 | 0 | 1 | 1 | 0 | 4 |
| arl4c    | 1 | 1 | 1 | 0 | 0 | 0 | 1 | 4 |
| tmem19   | 1 | 1 | 1 | 0 | 0 | 1 | 0 | 4 |
| cdc34    | 1 | 1 | 0 | 0 | 1 | 0 | 1 | 4 |
| gatad2a  | 1 | 1 | 1 | 0 | 0 | 0 | 1 | 4 |
| dhodh    | 1 | 1 | 1 | 0 | 0 | 0 | 1 | 4 |
| gale     | 1 | 1 | 1 | 0 | 0 | 0 | 1 | 4 |
| fzd5     | 1 | 1 | 0 | 0 | 1 | 1 | 0 | 4 |
| plpp2    | 1 | 1 | 0 | 0 | 1 | 0 | 1 | 4 |
| inf2     | 1 | 0 | 1 | 0 | 1 | 1 | 0 | 4 |
| fbli1    | 1 | 1 | 0 | 1 | 1 | 0 | 0 | 4 |
| six1     | 1 | 1 | 0 | 0 | 1 | 0 | 1 | 4 |
| sqstm1   | 1 | 1 | 1 | 0 | 0 | 1 | 0 | 4 |
| ikbke    | 1 | 1 | 0 | 0 | 0 | 1 | 1 | 4 |
| scara3   | 1 | 0 | 0 | 0 | 1 | 1 | 1 | 4 |
| ptpn2    | 1 | 1 | 0 | 0 | 1 | 0 | 1 | 4 |
| rdh10    | 1 | 1 | 0 | 0 | 1 | 0 | 1 | 4 |
| myo19    | 1 | 1 | 1 | 0 | 0 | 0 | 1 | 4 |
| enah     | 1 | 1 | 1 | 0 | 0 | 0 | 1 | 4 |
| tgfb2    | 1 | 0 | 0 | 0 | 1 | 1 | 1 | 4 |
| wdr1     | 1 | 1 | 0 | 0 | 1 | 0 | 1 | 4 |
| kctd10   | 1 | 1 | 0 | 1 | 0 | 1 | 0 | 4 |
| tob2     | 1 | 1 | 1 | 0 | 1 | 0 | 0 | 4 |

|          |   |   |   |   |   |   |   |   |
|----------|---|---|---|---|---|---|---|---|
| lpcat3   | 1 | 1 | 1 | 0 | 0 | 1 | 0 | 4 |
| pafah1b3 | 1 | 0 | 0 | 0 | 1 | 1 | 1 | 4 |
| ppp2r1b  | 1 | 1 | 0 | 0 | 1 | 1 | 0 | 4 |
| cenpf    | 1 | 1 | 1 | 0 | 0 | 1 | 0 | 4 |
| cd44     | 1 | 1 | 1 | 0 | 0 | 0 | 1 | 4 |
| specc1   | 1 | 1 | 1 | 0 | 1 | 0 | 0 | 4 |
| hspd1    | 1 | 1 | 1 | 0 | 0 | 0 | 1 | 4 |
| nolc1    | 1 | 1 | 1 | 0 | 0 | 0 | 1 | 4 |
| iah1     | 1 | 0 | 1 | 0 | 1 | 0 | 1 | 4 |
| adgrg1   | 1 | 0 | 1 | 0 | 0 | 1 | 1 | 4 |
| exosc1   | 1 | 1 | 1 | 0 | 0 | 0 | 1 | 4 |
| dlg3     | 1 | 1 | 0 | 0 | 1 | 0 | 1 | 4 |
| egl'n1   | 1 | 1 | 0 | 0 | 1 | 0 | 1 | 4 |
| odf2     | 1 | 1 | 0 | 0 | 1 | 0 | 1 | 4 |
| sidt2    | 1 | 1 | 1 | 0 | 1 | 0 | 0 | 4 |
| ebf1     | 1 | 1 | 0 | 0 | 1 | 0 | 1 | 4 |
| rrp12    | 1 | 0 | 1 | 0 | 0 | 1 | 1 | 4 |
| etf1     | 1 | 1 | 1 | 0 | 0 | 0 | 1 | 4 |
| ehd4     | 1 | 1 | 1 | 0 | 0 | 0 | 1 | 4 |
| mgst1    | 1 | 1 | 1 | 0 | 0 | 0 | 1 | 4 |
| lpxn     | 1 | 0 | 1 | 0 | 1 | 1 | 0 | 4 |
| pus1     | 1 | 1 | 1 | 0 | 0 | 0 | 1 | 4 |
| rab27a   | 1 | 1 | 0 | 0 | 1 | 1 | 0 | 4 |
| hbp1     | 1 | 0 | 1 | 0 | 1 | 0 | 1 | 4 |
| ppm1l    | 1 | 0 | 1 | 0 | 1 | 1 | 0 | 4 |
| utp14a   | 1 | 0 | 1 | 0 | 1 | 0 | 1 | 4 |
| klf4     | 1 | 1 | 0 | 1 | 0 | 1 | 0 | 4 |
| chka     | 1 | 1 | 0 | 0 | 1 | 0 | 1 | 4 |
| mkrn2    | 1 | 1 | 0 | 0 | 1 | 1 | 0 | 4 |
| sap30    | 1 | 1 | 0 | 0 | 1 | 0 | 1 | 4 |
| plk3     | 1 | 1 | 1 | 0 | 0 | 0 | 1 | 4 |
| psmc3ip  | 1 | 1 | 0 | 0 | 1 | 0 | 1 | 4 |
| coch     | 1 | 1 | 1 | 0 | 0 | 1 | 0 | 4 |
| gosr2    | 1 | 1 | 0 | 0 | 0 | 1 | 1 | 4 |
| rbm14    | 1 | 1 | 0 | 0 | 0 | 1 | 1 | 4 |
| cmb1     | 1 | 0 | 1 | 0 | 1 | 0 | 1 | 4 |
| kif2c    | 1 | 1 | 0 | 0 | 0 | 1 | 1 | 4 |
| wdr74    | 1 | 0 | 1 | 0 | 0 | 1 | 1 | 4 |
| yipf2    | 1 | 1 | 0 | 0 | 1 | 0 | 1 | 4 |
| ppargc1b | 1 | 1 | 1 | 0 | 0 | 0 | 1 | 4 |
| nefl     | 1 | 1 | 0 | 1 | 0 | 0 | 1 | 4 |
| tra2a    | 1 | 1 | 0 | 0 | 1 | 0 | 1 | 4 |
| stx3     | 1 | 1 | 0 | 0 | 1 | 0 | 1 | 4 |
| trim2    | 1 | 1 | 1 | 0 | 1 | 0 | 0 | 4 |
| atxn7l3b | 1 | 1 | 0 | 1 | 1 | 0 | 0 | 4 |

|          |   |   |   |   |   |   |   |   |
|----------|---|---|---|---|---|---|---|---|
| ube2g2   | 1 | 1 | 1 | 0 | 0 | 0 | 1 | 4 |
| slc24a3  | 1 | 0 | 1 | 0 | 1 | 1 | 0 | 4 |
| brd8     | 1 | 1 | 1 | 0 | 0 | 0 | 1 | 4 |
| tspan15  | 1 | 1 | 0 | 0 | 0 | 1 | 1 | 4 |
| dnajc10  | 1 | 1 | 1 | 0 | 0 | 1 | 0 | 4 |
| hpcal1   | 1 | 1 | 1 | 0 | 0 | 0 | 1 | 4 |
| mcf2     | 1 | 1 | 0 | 1 | 0 | 0 | 1 | 4 |
| jak1     | 1 | 0 | 1 | 0 | 1 | 1 | 0 | 4 |
| idh1     | 1 | 1 | 0 | 0 | 1 | 0 | 1 | 4 |
| hip1     | 1 | 0 | 1 | 0 | 1 | 1 | 0 | 4 |
| ap1s1    | 1 | 1 | 0 | 1 | 0 | 0 | 1 | 4 |
| celf4    | 1 | 1 | 0 | 0 | 1 | 0 | 1 | 4 |
| cib2     | 1 | 1 | 0 | 0 | 1 | 0 | 1 | 4 |
| slc7a6   | 1 | 1 | 1 | 0 | 0 | 0 | 1 | 4 |
| crtap    | 1 | 1 | 1 | 0 | 0 | 0 | 1 | 4 |
| hsp90b1  | 1 | 1 | 1 | 0 | 0 | 0 | 1 | 4 |
| tmem33   | 1 | 1 | 1 | 0 | 0 | 0 | 1 | 4 |
| tgfb3    | 1 | 1 | 0 | 0 | 1 | 0 | 1 | 4 |
| acy3     | 1 | 1 | 0 | 0 | 1 | 1 | 0 | 4 |
| nrp2     | 1 | 1 | 0 | 1 | 0 | 0 | 1 | 4 |
| pla2g2d  | 1 | 1 | 0 | 0 | 1 | 0 | 1 | 4 |
| pfkfb4   | 1 | 0 | 0 | 0 | 1 | 1 | 1 | 4 |
| akap9    | 1 | 1 | 1 | 0 | 1 | 0 | 0 | 4 |
| polr3d   | 1 | 1 | 0 | 0 | 0 | 1 | 1 | 4 |
| polr3h   | 1 | 1 | 1 | 0 | 0 | 0 | 1 | 4 |
| atp6v1c2 | 1 | 0 | 0 | 0 | 1 | 1 | 1 | 4 |
| glmp     | 1 | 1 | 1 | 0 | 0 | 1 | 0 | 4 |
| dnajc18  | 1 | 1 | 0 | 0 | 1 | 0 | 1 | 4 |
| pdzrn3   | 1 | 1 | 0 | 0 | 1 | 0 | 1 | 4 |
| apaf1    | 1 | 0 | 1 | 0 | 0 | 1 | 1 | 4 |
| srsf7    | 1 | 1 | 1 | 0 | 1 | 0 | 0 | 4 |
| nop16    | 1 | 0 | 1 | 0 | 0 | 1 | 1 | 4 |
| manf     | 1 | 1 | 1 | 0 | 0 | 0 | 1 | 4 |
| ppp2cb   | 1 | 1 | 0 | 0 | 1 | 0 | 1 | 4 |
| shmt1    | 1 | 1 | 0 | 0 | 1 | 0 | 1 | 4 |
| perp     | 1 | 1 | 1 | 0 | 1 | 0 | 0 | 4 |
| smim8    | 1 | 1 | 0 | 0 | 1 | 0 | 1 | 4 |
| nfkfbiz  | 1 | 1 | 0 | 0 | 0 | 1 | 1 | 4 |
| pa2g4    | 1 | 1 | 1 | 0 | 1 | 0 | 0 | 4 |
| tfdp1    | 1 | 1 | 0 | 1 | 0 | 0 | 1 | 4 |
| pum3     | 1 | 0 | 1 | 0 | 0 | 1 | 1 | 4 |
| ralgps2  | 1 | 1 | 1 | 0 | 0 | 0 | 1 | 4 |
| glcci1   | 1 | 1 | 1 | 0 | 1 | 0 | 0 | 4 |
| arpc5    | 1 | 1 | 0 | 0 | 1 | 0 | 1 | 4 |
| rcc1     | 1 | 0 | 1 | 0 | 1 | 0 | 1 | 4 |

|          |   |   |   |   |   |   |   |   |
|----------|---|---|---|---|---|---|---|---|
| tra2b    | 1 | 1 | 0 | 0 | 1 | 0 | 1 | 4 |
| srsf6    | 1 | 1 | 1 | 0 | 1 | 0 | 0 | 4 |
| itm2c    | 1 | 0 | 0 | 0 | 1 | 1 | 1 | 4 |
| st14     | 1 | 1 | 0 | 0 | 1 | 1 | 0 | 4 |
| wwc1     | 1 | 1 | 1 | 0 | 1 | 0 | 0 | 4 |
| gpd2     | 1 | 0 | 0 | 0 | 1 | 1 | 1 | 4 |
| chaf1b   | 1 | 1 | 0 | 0 | 1 | 0 | 1 | 4 |
| znrf2    | 1 | 1 | 1 | 0 | 0 | 0 | 1 | 4 |
| tbrg1    | 1 | 1 | 0 | 0 | 1 | 1 | 0 | 4 |
| abhd6    | 1 | 1 | 1 | 0 | 1 | 0 | 0 | 4 |
| ikzf4    | 1 | 1 | 1 | 0 | 1 | 0 | 0 | 4 |
| elf4ebp2 | 1 | 1 | 0 | 0 | 0 | 1 | 1 | 4 |
| spata5   | 1 | 1 | 1 | 0 | 0 | 1 | 0 | 4 |
| gpd1     | 1 | 1 | 0 | 0 | 1 | 0 | 1 | 4 |
| rhoc     | 1 | 1 | 1 | 0 | 0 | 0 | 1 | 4 |
| srsf3    | 1 | 1 | 0 | 0 | 1 | 0 | 1 | 4 |
| plp2     | 1 | 1 | 0 | 0 | 1 | 1 | 0 | 4 |
| alcam    | 1 | 1 | 0 | 0 | 1 | 0 | 1 | 4 |
| zfpand3  | 1 | 1 | 0 | 0 | 1 | 1 | 0 | 4 |
| figl1    | 1 | 1 | 1 | 0 | 0 | 0 | 1 | 4 |
| iqgap1   | 1 | 1 | 0 | 0 | 1 | 0 | 1 | 4 |
| chd1     | 1 | 1 | 0 | 0 | 1 | 1 | 0 | 4 |
| usp3     | 1 | 1 | 1 | 0 | 1 | 0 | 0 | 4 |
| pip4k2a  | 1 | 0 | 1 | 0 | 1 | 1 | 0 | 4 |
| tpp1     | 1 | 1 | 1 | 0 | 0 | 0 | 1 | 4 |
| tmem120b | 1 | 1 | 1 | 0 | 1 | 0 | 0 | 4 |
| ska2     | 1 | 1 | 0 | 0 | 0 | 1 | 1 | 4 |
| clasp2   | 1 | 1 | 0 | 0 | 1 | 1 | 0 | 4 |
| cdkn2b   | 1 | 1 | 1 | 0 | 1 | 0 | 0 | 4 |
| tial1    | 1 | 1 | 1 | 0 | 0 | 0 | 1 | 4 |
| emp2     | 1 | 1 | 0 | 0 | 0 | 1 | 1 | 4 |
| fbn2     | 1 | 1 | 0 | 1 | 1 | 0 | 0 | 4 |
| rbp1     | 1 | 1 | 0 | 0 | 1 | 0 | 1 | 4 |
| cmas     | 1 | 1 | 0 | 0 | 1 | 0 | 1 | 4 |
| arhgap9  | 1 | 1 | 1 | 0 | 1 | 0 | 0 | 4 |
| serbp1   | 1 | 1 | 1 | 0 | 0 | 0 | 1 | 4 |
| btg2     | 1 | 1 | 1 | 0 | 0 | 0 | 1 | 4 |
| lpcat2   | 1 | 0 | 0 | 0 | 1 | 1 | 1 | 4 |
| usp2     | 1 | 0 | 1 | 0 | 1 | 0 | 1 | 4 |
| tspan31  | 1 | 1 | 1 | 1 | 0 | 0 | 0 | 4 |
| ptprf    | 1 | 1 | 1 | 0 | 1 | 0 | 0 | 4 |
| cfb      | 1 | 1 | 0 | 0 | 0 | 1 | 1 | 4 |
| cmtm7    | 1 | 1 | 1 | 1 | 0 | 0 | 0 | 4 |
| mgp      | 1 | 0 | 0 | 0 | 1 | 1 | 1 | 4 |
| triobp   | 1 | 1 | 0 | 0 | 1 | 0 | 1 | 4 |

|           |   |   |   |   |   |   |   |   |
|-----------|---|---|---|---|---|---|---|---|
| hbegf     | 1 | 1 | 0 | 0 | 0 | 1 | 1 | 4 |
| lamb3     | 1 | 0 | 0 | 0 | 1 | 1 | 1 | 4 |
| use1      | 1 | 1 | 0 | 0 | 0 | 1 | 1 | 4 |
| trib3     | 1 | 1 | 1 | 0 | 0 | 1 | 0 | 4 |
| phlda1    | 1 | 1 | 0 | 0 | 1 | 0 | 1 | 4 |
| snx5      | 1 | 1 | 1 | 0 | 0 | 0 | 1 | 4 |
| srprb     | 1 | 1 | 1 | 0 | 0 | 0 | 1 | 4 |
| klhl13    | 1 | 1 | 1 | 0 | 0 | 0 | 1 | 4 |
| pxk       | 1 | 1 | 0 | 0 | 1 | 1 | 0 | 4 |
| grina     | 1 | 1 | 0 | 0 | 1 | 0 | 1 | 4 |
| bcl2l13   | 1 | 0 | 0 | 0 | 1 | 1 | 1 | 4 |
| rabgap1l  | 1 | 1 | 0 | 0 | 1 | 0 | 1 | 4 |
| mdm1      | 1 | 1 | 1 | 0 | 0 | 0 | 1 | 4 |
| rhpn2     | 1 | 1 | 0 | 0 | 1 | 0 | 1 | 4 |
| cpeb2     | 1 | 0 | 1 | 0 | 1 | 1 | 0 | 4 |
| haus6     | 1 | 0 | 1 | 0 | 1 | 0 | 1 | 4 |
| bicd1     | 1 | 1 | 1 | 0 | 0 | 0 | 1 | 4 |
| orc1      | 1 | 1 | 0 | 0 | 0 | 1 | 1 | 4 |
| cadm1     | 1 | 1 | 1 | 0 | 1 | 0 | 0 | 4 |
| sord      | 1 | 1 | 1 | 0 | 0 | 0 | 1 | 4 |
| polr2f    | 1 | 1 | 1 | 0 | 0 | 0 | 1 | 4 |
| antxr1    | 1 | 0 | 0 | 1 | 1 | 1 | 0 | 4 |
| kpnb1     | 1 | 1 | 1 | 0 | 0 | 0 | 1 | 4 |
| bccip     | 1 | 1 | 1 | 0 | 0 | 0 | 1 | 4 |
| uhrf1bp1l | 1 | 1 | 0 | 0 | 1 | 0 | 1 | 4 |
| tubb2b    | 1 | 1 | 0 | 0 | 1 | 0 | 1 | 4 |
| cnot6l    | 1 | 1 | 0 | 0 | 0 | 1 | 1 | 4 |
| gtse1     | 1 | 1 | 0 | 0 | 0 | 1 | 1 | 4 |
| mfsd6     | 1 | 1 | 0 | 0 | 1 | 0 | 1 | 4 |
| nol4l     | 1 | 0 | 1 | 0 | 1 | 0 | 1 | 4 |
| cryz1l    | 1 | 1 | 1 | 1 | 0 | 0 | 0 | 4 |
| brca1     | 1 | 1 | 0 | 0 | 1 | 0 | 1 | 4 |
| npas3     | 1 | 1 | 1 | 0 | 1 | 0 | 0 | 4 |
| timm44    | 1 | 1 | 1 | 0 | 0 | 0 | 1 | 4 |
| agfg2     | 1 | 1 | 1 | 0 | 1 | 0 | 0 | 4 |
| nek2      | 1 | 1 | 1 | 0 | 0 | 0 | 1 | 4 |
| dgat2     | 1 | 1 | 0 | 0 | 1 | 0 | 1 | 4 |
| insig1    | 1 | 0 | 1 | 0 | 1 | 1 | 0 | 4 |
| gucy1b3   | 1 | 1 | 0 | 1 | 0 | 1 | 0 | 4 |
| srsf1     | 1 | 1 | 1 | 0 | 0 | 0 | 1 | 4 |
| abhd2     | 1 | 1 | 1 | 0 | 0 | 0 | 1 | 4 |
| ctbp2     | 1 | 1 | 0 | 0 | 1 | 0 | 1 | 4 |
| trmt1     | 1 | 1 | 1 | 0 | 0 | 1 | 0 | 4 |
| il17ra    | 1 | 1 | 1 | 0 | 0 | 0 | 1 | 4 |
| fbxo2     | 1 | 1 | 0 | 0 | 0 | 1 | 1 | 4 |



|           |   |   |   |   |   |   |   |   |
|-----------|---|---|---|---|---|---|---|---|
| gltp      | 1 | 1 | 0 | 0 | 1 | 1 | 0 | 4 |
| hnrnpu    | 1 | 1 | 1 | 0 | 0 | 0 | 1 | 4 |
| man2c1    | 1 | 1 | 1 | 0 | 0 | 0 | 1 | 4 |
| cdc25c    | 1 | 0 | 1 | 0 | 0 | 1 | 1 | 4 |
| plscr1    | 1 | 0 | 0 | 0 | 1 | 1 | 1 | 4 |
| tjp2      | 1 | 0 | 0 | 1 | 1 | 0 | 1 | 4 |
| gata3     | 1 | 0 | 0 | 0 | 1 | 1 | 1 | 4 |
| chac2     | 1 | 1 | 1 | 0 | 1 | 0 | 0 | 4 |
| lpp       | 1 | 1 | 0 | 1 | 1 | 0 | 0 | 4 |
| rab3ip    | 1 | 1 | 1 | 0 | 0 | 0 | 1 | 4 |
| rerg      | 1 | 0 | 0 | 0 | 1 | 1 | 1 | 4 |
| ftsj3     | 1 | 1 | 1 | 0 | 0 | 0 | 1 | 4 |
| ssbp3     | 1 | 1 | 1 | 0 | 0 | 1 | 0 | 4 |
| b4galt3   | 1 | 1 | 1 | 0 | 1 | 0 | 0 | 4 |
| qtrt1     | 1 | 0 | 0 | 0 | 1 | 1 | 1 | 4 |
| utrnl     | 1 | 1 | 1 | 0 | 1 | 0 | 0 | 4 |
| hectd1    | 1 | 1 | 0 | 0 | 1 | 1 | 0 | 4 |
| sec14l1   | 1 | 1 | 1 | 0 | 0 | 0 | 1 | 4 |
| rhob      | 1 | 1 | 1 | 0 | 0 | 0 | 1 | 4 |
| id2       | 1 | 0 | 1 | 0 | 1 | 1 | 0 | 4 |
| caprin1   | 1 | 1 | 0 | 0 | 1 | 0 | 1 | 4 |
| ctsa      | 1 | 1 | 0 | 0 | 0 | 1 | 1 | 4 |
| csnk2a2   | 1 | 1 | 0 | 0 | 1 | 1 | 0 | 4 |
| myo5b     | 1 | 0 | 1 | 0 | 1 | 1 | 0 | 4 |
| noc2l     | 1 | 0 | 1 | 0 | 1 | 1 | 0 | 4 |
| s100a1    | 1 | 1 | 0 | 0 | 1 | 0 | 1 | 4 |
| usp6nl    | 1 | 0 | 1 | 0 | 1 | 0 | 1 | 4 |
| rpe       | 1 | 1 | 0 | 0 | 0 | 1 | 1 | 4 |
| orc2      | 1 | 0 | 0 | 0 | 1 | 1 | 1 | 4 |
| ncl       | 1 | 1 | 0 | 0 | 1 | 0 | 1 | 4 |
| sec63     | 1 | 1 | 1 | 0 | 0 | 1 | 0 | 4 |
| hlx       | 1 | 1 | 0 | 0 | 1 | 0 | 1 | 4 |
| tnfrsf21  | 1 | 1 | 0 | 1 | 1 | 0 | 0 | 4 |
| slco3a1   | 1 | 0 | 1 | 0 | 1 | 0 | 1 | 4 |
| naa25     | 1 | 0 | 1 | 0 | 0 | 1 | 1 | 4 |
| hnrnpa2b1 | 1 | 1 | 0 | 0 | 1 | 0 | 1 | 4 |
| mcm5      | 1 | 0 | 0 | 0 | 1 | 1 | 1 | 4 |
| tspan6    | 1 | 1 | 0 | 0 | 0 | 1 | 1 | 4 |
| elif5a    | 1 | 1 | 1 | 0 | 0 | 0 | 1 | 4 |
| mrps25    | 1 | 1 | 1 | 0 | 0 | 0 | 1 | 4 |
| fdft1     | 1 | 1 | 1 | 0 | 1 | 0 | 0 | 4 |
| prelid1   | 1 | 1 | 0 | 0 | 1 | 0 | 1 | 4 |
| fitm2     | 1 | 0 | 1 | 0 | 1 | 0 | 1 | 4 |
| arih2     | 1 | 1 | 1 | 0 | 0 | 1 | 0 | 4 |
| ankef1    | 1 | 0 | 1 | 1 | 1 | 0 | 0 | 4 |

|          |   |   |   |   |   |   |   |   |
|----------|---|---|---|---|---|---|---|---|
| pwp1     | 1 | 0 | 1 | 0 | 1 | 0 | 1 | 4 |
| frmd4b   | 1 | 1 | 0 | 0 | 1 | 1 | 0 | 4 |
| EIF4G1   | 1 | 1 | 0 | 0 | 1 | 0 | 1 | 4 |
| MIS18BP1 | 1 | 0 | 1 | 0 | 1 | 0 | 1 | 4 |
| DDR2     | 1 | 0 | 0 | 0 | 1 | 1 | 1 | 4 |
| tufm     | 1 | 1 | 1 | 0 | 0 | 0 | 1 | 4 |
| FRK      | 1 | 1 | 0 | 0 | 1 | 1 | 0 | 4 |
| SPATA6   | 1 | 1 | 0 | 1 | 0 | 0 | 1 | 4 |
| malat1   | 1 | 1 | 1 | 0 | 1 | 0 | 0 | 4 |
| PTPRK    | 1 | 1 | 0 | 1 | 1 | 0 | 0 | 4 |
| ywhag    | 1 | 0 | 1 | 0 | 1 | 0 | 1 | 4 |
| EIF2S2   | 1 | 1 | 1 | 0 | 1 | 0 | 0 | 4 |
| PHGDH    | 1 | 1 | 0 | 0 | 1 | 0 | 1 | 4 |
| BHLHA15  | 1 | 0 | 1 | 0 | 1 | 0 | 1 | 4 |
| metap2   | 1 | 1 | 1 | 0 | 0 | 0 | 1 | 4 |
| fyn      | 1 | 0 | 1 | 0 | 1 | 1 | 0 | 4 |
| stau2    | 1 | 1 | 0 | 0 | 1 | 1 | 0 | 4 |
| slc25a51 | 1 | 1 | 0 | 0 | 1 | 1 | 0 | 4 |
| tmpo     | 1 | 1 | 0 | 0 | 1 | 0 | 1 | 4 |
| slc39a6  | 1 | 1 | 1 | 0 | 0 | 0 | 1 | 4 |
| plscr2   | 1 | 0 | 0 | 0 | 1 | 1 | 1 | 4 |
| msn      | 1 | 1 | 0 | 0 | 0 | 1 | 1 | 4 |
| exph5    | 1 | 0 | 1 | 0 | 1 | 1 | 0 | 4 |
| sfxn4    | 1 | 0 | 1 | 0 | 1 | 0 | 1 | 4 |
| tcn2     | 1 | 1 | 0 | 0 | 0 | 1 | 1 | 4 |
| smim10l1 | 1 | 1 | 0 | 1 | 1 | 0 | 0 | 4 |
| rell1    | 1 | 1 | 0 | 0 | 1 | 0 | 1 | 4 |
| prdm1    | 1 | 0 | 1 | 0 | 1 | 1 | 0 | 4 |
| tsc22d1  | 1 | 1 | 1 | 0 | 0 | 0 | 1 | 4 |
| hnrnpdl  | 1 | 1 | 1 | 0 | 1 | 0 | 0 | 4 |
| snai2    | 1 | 1 | 1 | 0 | 0 | 0 | 1 | 4 |
| col17a1  | 1 | 0 | 0 | 1 | 1 | 0 | 1 | 4 |
| ppib     | 1 | 1 | 1 | 0 | 1 | 0 | 0 | 4 |
| racgap1  | 1 | 1 | 0 | 0 | 0 | 1 | 1 | 4 |
| adcy9    | 1 | 1 | 1 | 0 | 0 | 0 | 1 | 4 |
| parp9    | 1 | 1 | 1 | 0 | 1 | 0 | 0 | 4 |
| atad2b   | 1 | 1 | 1 | 0 | 1 | 0 | 0 | 4 |
| wdr55    | 1 | 1 | 0 | 0 | 1 | 0 | 1 | 4 |
| kctd5    | 1 | 1 | 1 | 0 | 0 | 0 | 1 | 4 |
| tmem106a | 1 | 1 | 1 | 0 | 1 | 0 | 0 | 4 |
| dhx9     | 1 | 0 | 1 | 0 | 0 | 1 | 1 | 4 |
| snapc3   | 1 | 1 | 0 | 0 | 1 | 0 | 1 | 4 |
| tm9sf3   | 1 | 1 | 1 | 0 | 0 | 0 | 1 | 4 |
| tkf      | 1 | 1 | 1 | 0 | 1 | 0 | 0 | 4 |
| clip4    | 1 | 1 | 0 | 0 | 1 | 1 | 0 | 4 |

|          |   |   |   |   |   |   |   |   |
|----------|---|---|---|---|---|---|---|---|
| pcmttd1  | 1 | 0 | 1 | 0 | 1 | 0 | 1 | 4 |
| cd9      | 1 | 0 | 1 | 0 | 1 | 1 | 0 | 4 |
| tap2     | 1 | 1 | 1 | 0 | 1 | 0 | 0 | 4 |
| brd3     | 1 | 1 | 1 | 0 | 1 | 0 | 0 | 4 |
| gdpd3    | 1 | 1 | 0 | 0 | 1 | 1 | 0 | 4 |
| aimp2    | 1 | 1 | 0 | 0 | 1 | 0 | 1 | 4 |
| iffo1    | 1 | 1 | 0 | 0 | 1 | 0 | 1 | 4 |
| taf9b    | 1 | 0 | 1 | 0 | 0 | 1 | 1 | 4 |
| zmpste24 | 1 | 1 | 1 | 0 | 0 | 0 | 1 | 4 |
| prkd1    | 1 | 1 | 0 | 0 | 1 | 0 | 1 | 4 |
| heatr1   | 1 | 0 | 1 | 0 | 0 | 1 | 1 | 4 |
| dhcr7    | 1 | 1 | 1 | 0 | 0 | 1 | 0 | 4 |
| sft2d2   | 1 | 1 | 0 | 0 | 1 | 1 | 0 | 4 |
| ckb      | 1 | 0 | 1 | 0 | 1 | 1 | 0 | 4 |
| nudcd1   | 1 | 0 | 1 | 0 | 1 | 0 | 1 | 4 |
| mecom    | 1 | 0 | 1 | 0 | 1 | 0 | 1 | 4 |
| ppif     | 1 | 0 | 1 | 0 | 1 | 0 | 1 | 4 |
| dyrk1a   | 1 | 1 | 1 | 0 | 0 | 0 | 1 | 4 |
| polr2h   | 1 | 1 | 1 | 0 | 0 | 0 | 1 | 4 |
| arl6ip5  | 1 | 0 | 0 | 0 | 1 | 1 | 1 | 4 |
| zmym1    | 1 | 0 | 1 | 0 | 1 | 0 | 1 | 4 |
| adm      | 1 | 0 | 1 | 1 | 0 | 0 | 1 | 4 |
| papola   | 1 | 1 | 1 | 0 | 0 | 0 | 1 | 4 |
| mlt3     | 1 | 1 | 0 | 0 | 1 | 0 | 1 | 4 |
| b4galt6  | 1 | 1 | 0 | 0 | 0 | 1 | 1 | 4 |
| sdhd     | 1 | 1 | 0 | 0 | 1 | 0 | 1 | 4 |
| pnpt1    | 1 | 0 | 1 | 0 | 0 | 1 | 1 | 4 |
| hey1     | 1 | 0 | 1 | 0 | 1 | 0 | 1 | 4 |
| mylk     | 1 | 1 | 0 | 0 | 1 | 0 | 1 | 4 |
| srsf10   | 1 | 1 | 1 | 0 | 0 | 0 | 1 | 4 |
| ezr      | 1 | 1 | 1 | 0 | 0 | 0 | 1 | 4 |
| pdc11    | 1 | 0 | 1 | 0 | 0 | 1 | 1 | 4 |
| emc6     | 1 | 1 | 0 | 0 | 1 | 0 | 1 | 4 |
| ltbp3    | 1 | 1 | 0 | 1 | 0 | 0 | 1 | 4 |
| csnk2a1  | 1 | 1 | 1 | 0 | 1 | 0 | 0 | 4 |
| pard3    | 1 | 1 | 0 | 0 | 1 | 1 | 0 | 4 |
| tax1bp1  | 1 | 1 | 0 | 0 | 1 | 1 | 0 | 4 |
| kpna3    | 1 | 1 | 0 | 0 | 1 | 0 | 1 | 4 |
| txn2     | 1 | 1 | 0 | 0 | 1 | 0 | 1 | 4 |
| tab2     | 1 | 0 | 1 | 0 | 1 | 1 | 0 | 4 |
| lypd6    | 1 | 0 | 0 | 1 | 1 | 0 | 1 | 4 |
| prps2    | 1 | 0 | 1 | 0 | 1 | 0 | 1 | 4 |
| elf2     | 1 | 0 | 1 | 0 | 1 | 0 | 1 | 4 |
| pde8a    | 1 | 1 | 0 | 0 | 1 | 0 | 1 | 4 |
| cdca5    | 1 | 1 | 0 | 0 | 1 | 0 | 1 | 4 |

|           |   |   |   |   |   |   |   |   |
|-----------|---|---|---|---|---|---|---|---|
| cttnbp2nl | 1 | 0 | 1 | 0 | 1 | 0 | 1 | 4 |
| far1      | 1 | 1 | 1 | 0 | 0 | 0 | 1 | 4 |
| tcof1     | 1 | 0 | 1 | 0 | 0 | 1 | 1 | 4 |
| ece2      | 1 | 0 | 1 | 0 | 1 | 0 | 1 | 4 |
| errfi1    | 1 | 1 | 0 | 0 | 0 | 1 | 1 | 4 |
| suox      | 1 | 0 | 1 | 0 | 0 | 1 | 1 | 4 |
| dera      | 1 | 1 | 0 | 0 | 1 | 0 | 1 | 4 |
| mylip     | 1 | 1 | 1 | 0 | 0 | 0 | 1 | 4 |
| dctpp1    | 1 | 0 | 1 | 0 | 1 | 0 | 1 | 4 |
| hspa5     | 1 | 1 | 1 | 0 | 0 | 1 | 0 | 4 |
| hexa      | 1 | 1 | 1 | 0 | 0 | 0 | 1 | 4 |
| gabarap   | 1 | 1 | 1 | 0 | 0 | 0 | 1 | 4 |
| rprd1a    | 1 | 1 | 1 | 0 | 1 | 0 | 0 | 4 |
| rnf145    | 1 | 1 | 0 | 0 | 1 | 0 | 1 | 4 |
| ift81     | 1 | 1 | 1 | 0 | 0 | 0 | 1 | 4 |
| sdcbp     | 1 | 1 | 1 | 0 | 0 | 0 | 1 | 4 |
| sugt1     | 1 | 1 | 1 | 1 | 0 | 0 | 0 | 4 |
| bcl6      | 1 | 1 | 1 | 0 | 1 | 0 | 0 | 4 |
| rbm17     | 1 | 1 | 0 | 1 | 0 | 0 | 1 | 4 |
| tmed5     | 1 | 1 | 1 | 0 | 0 | 0 | 1 | 4 |
| taf7      | 1 | 1 | 0 | 0 | 1 | 1 | 0 | 4 |
| pole2     | 1 | 1 | 0 | 0 | 0 | 1 | 1 | 4 |
| dusp6     | 1 | 0 | 0 | 1 | 1 | 0 | 1 | 4 |
| fkbp1b    | 1 | 1 | 1 | 0 | 0 | 0 | 1 | 4 |
| arl6ip1   | 1 | 1 | 1 | 0 | 0 | 0 | 1 | 4 |
| ak2       | 1 | 1 | 1 | 0 | 1 | 0 | 0 | 4 |
| fez1      | 1 | 1 | 1 | 0 | 1 | 0 | 0 | 4 |
| mybl2     | 1 | 1 | 0 | 0 | 0 | 1 | 1 | 4 |
| sel1l     | 1 | 1 | 1 | 0 | 0 | 1 | 0 | 4 |
| anapc5    | 1 | 0 | 1 | 0 | 1 | 0 | 1 | 4 |
| epb41l5   | 1 | 0 | 1 | 0 | 1 | 1 | 0 | 4 |
| bub1      | 1 | 1 | 1 | 0 | 0 | 0 | 1 | 4 |
| tmed3     | 1 | 1 | 1 | 0 | 0 | 0 | 1 | 4 |
| cybrd1    | 1 | 0 | 1 | 1 | 1 | 0 | 0 | 4 |
| nus1      | 1 | 1 | 1 | 0 | 0 | 0 | 1 | 4 |
| nrm       | 1 | 1 | 0 | 0 | 0 | 1 | 1 | 4 |
| hnrnp1l   | 1 | 1 | 0 | 0 | 1 | 0 | 1 | 4 |
| stat3     | 1 | 0 | 1 | 0 | 1 | 1 | 0 | 4 |
| samd9l    | 1 | 0 | 1 | 0 | 1 | 0 | 1 | 4 |
| cct2      | 1 | 1 | 1 | 0 | 1 | 0 | 0 | 4 |
| il1r1     | 1 | 1 | 0 | 0 | 1 | 0 | 1 | 4 |
| khdrbs3   | 1 | 1 | 0 | 0 | 1 | 0 | 1 | 4 |
| glul      | 1 | 1 | 0 | 0 | 1 | 0 | 1 | 4 |
| bcl2      | 1 | 0 | 0 | 0 | 1 | 1 | 1 | 4 |
| p2rx7     | 1 | 0 | 0 | 0 | 1 | 1 | 1 | 4 |

|          |   |   |   |   |   |   |   |   |
|----------|---|---|---|---|---|---|---|---|
| calml4   | 1 | 1 | 0 | 0 | 1 | 0 | 1 | 4 |
| map2k5   | 1 | 1 | 1 | 0 | 0 | 1 | 0 | 4 |
| slc44a1  | 1 | 1 | 1 | 0 | 1 | 0 | 0 | 4 |
| arhgap24 | 1 | 1 | 0 | 0 | 1 | 0 | 1 | 4 |
| atf7ip   | 1 | 1 | 1 | 0 | 1 | 0 | 0 | 4 |
| trps1    | 1 | 1 | 1 | 0 | 1 | 0 | 0 | 4 |
| phip     | 1 | 1 | 1 | 0 | 1 | 0 | 0 | 4 |
| rragc    | 1 | 1 | 0 | 0 | 1 | 1 | 0 | 4 |
| cyp39a1  | 1 | 1 | 0 | 0 | 0 | 1 | 1 | 4 |
| tmem144  | 1 | 1 | 0 | 0 | 1 | 0 | 1 | 4 |
| diaph3   | 1 | 1 | 0 | 0 | 0 | 1 | 1 | 4 |
| aurka    | 1 | 1 | 0 | 0 | 0 | 1 | 1 | 4 |
| morf4l2  | 1 | 1 | 0 | 0 | 1 | 0 | 1 | 4 |
| hspa4l   | 1 | 1 | 1 | 0 | 0 | 0 | 1 | 4 |
| epb41l4a | 1 | 0 | 1 | 0 | 1 | 0 | 1 | 4 |
| ndufa9   | 1 | 1 | 0 | 0 | 1 | 0 | 1 | 4 |
| junb     | 1 | 1 | 0 | 0 | 0 | 1 | 1 | 4 |
| sort1    | 1 | 1 | 0 | 0 | 1 | 0 | 1 | 4 |
| msmo1    | 1 | 1 | 0 | 0 | 1 | 0 | 1 | 4 |
| c1qbp    | 1 | 1 | 1 | 0 | 0 | 0 | 1 | 4 |
| nedd9    | 1 | 1 | 0 | 0 | 0 | 1 | 1 | 4 |
| fmo1     | 1 | 1 | 0 | 0 | 1 | 0 | 1 | 4 |
| clic5    | 1 | 0 | 1 | 0 | 1 | 1 | 0 | 4 |
| zeb1     | 1 | 1 | 0 | 0 | 1 | 0 | 1 | 4 |
| alk      | 1 | 1 | 0 | 0 | 1 | 0 | 1 | 4 |
| plpp3    | 1 | 1 | 1 | 0 | 0 | 0 | 1 | 4 |
| pigp     | 1 | 1 | 0 | 0 | 1 | 0 | 1 | 4 |
| aasdhppt | 1 | 0 | 1 | 0 | 1 | 0 | 1 | 4 |
| tspan7   | 1 | 1 | 0 | 0 | 1 | 0 | 1 | 4 |
| plekha7  | 1 | 1 | 1 | 0 | 1 | 0 | 0 | 4 |
| knop1    | 1 | 1 | 1 | 0 | 1 | 0 | 0 | 4 |
| flad1    | 1 | 1 | 1 | 0 | 1 | 0 | 0 | 4 |
| mrpl35   | 1 | 1 | 1 | 0 | 0 | 0 | 1 | 4 |
| snd1     | 1 | 1 | 0 | 0 | 1 | 0 | 1 | 4 |
| pgam1    | 1 | 1 | 0 | 0 | 1 | 0 | 1 | 4 |
| fam162a  | 1 | 1 | 1 | 0 | 0 | 0 | 1 | 4 |
| ppp1r15a | 1 | 1 | 0 | 0 | 0 | 1 | 1 | 4 |
| rpia     | 1 | 1 | 1 | 0 | 0 | 0 | 1 | 4 |
| amd1     | 1 | 0 | 1 | 0 | 1 | 0 | 1 | 4 |
| mcm4     | 1 | 1 | 0 | 0 | 1 | 0 | 1 | 4 |
| kif1b    | 1 | 1 | 1 | 0 | 1 | 0 | 0 | 4 |
| nrp1     | 1 | 1 | 1 | 0 | 0 | 1 | 0 | 4 |
| cnpy2    | 1 | 1 | 1 | 0 | 1 | 0 | 0 | 4 |
| wdr43    | 1 | 1 | 1 | 0 | 0 | 1 | 0 | 4 |
| pfkp     | 1 | 1 | 1 | 0 | 1 | 0 | 0 | 4 |

|            |   |   |   |   |   |   |   |   |
|------------|---|---|---|---|---|---|---|---|
| ywhaz      | 1 | 1 | 0 | 0 | 1 | 0 | 1 | 4 |
| wdr36      | 1 | 0 | 1 | 0 | 0 | 1 | 1 | 4 |
| klhl7      | 1 | 1 | 1 | 0 | 1 | 0 | 0 | 4 |
| uchl5      | 1 | 1 | 0 | 0 | 0 | 1 | 1 | 4 |
| opa1       | 1 | 1 | 0 | 0 | 1 | 0 | 1 | 4 |
| polr3k     | 1 | 0 | 1 | 0 | 1 | 0 | 1 | 4 |
| nqo2       | 1 | 1 | 0 | 0 | 1 | 0 | 1 | 4 |
| ino80c     | 1 | 1 | 1 | 0 | 0 | 0 | 1 | 4 |
| set        | 1 | 1 | 0 | 0 | 1 | 0 | 1 | 4 |
| mns1       | 1 | 0 | 0 | 0 | 1 | 1 | 1 | 4 |
| bid        | 1 | 1 | 1 | 0 | 0 | 0 | 1 | 4 |
| mtdh       | 1 | 1 | 1 | 0 | 0 | 1 | 0 | 4 |
| klf6       | 1 | 1 | 0 | 0 | 0 | 1 | 1 | 4 |
| prcp       | 1 | 1 | 0 | 0 | 1 | 1 | 0 | 4 |
| uchl1      | 1 | 1 | 0 | 0 | 0 | 1 | 1 | 4 |
| csnk1d     | 1 | 1 | 0 | 0 | 1 | 0 | 1 | 4 |
| oard1      | 1 | 1 | 0 | 0 | 0 | 1 | 1 | 4 |
| hmox1      | 1 | 1 | 0 | 1 | 0 | 0 | 1 | 4 |
| rrp9       | 1 | 0 | 1 | 0 | 0 | 1 | 1 | 4 |
| zfyve1     | 1 | 0 | 1 | 0 | 1 | 0 | 1 | 4 |
| mras       | 1 | 1 | 0 | 0 | 1 | 1 | 0 | 4 |
| aida       | 1 | 1 | 0 | 0 | 1 | 0 | 1 | 4 |
| zmynd19    | 1 | 0 | 1 | 0 | 1 | 0 | 1 | 4 |
| csgalnact2 | 1 | 1 | 0 | 0 | 1 | 1 | 0 | 4 |
| ucp2       | 1 | 0 | 1 | 0 | 1 | 1 | 0 | 4 |
| pallid     | 1 | 1 | 0 | 0 | 1 | 1 | 0 | 4 |
| isg20      | 1 | 1 | 1 | 1 | 0 | 0 | 0 | 4 |
| ybx3       | 1 | 1 | 1 | 0 | 0 | 0 | 1 | 4 |
| trim27     | 1 | 1 | 1 | 0 | 1 | 0 | 0 | 4 |
| picalm     | 1 | 1 | 1 | 0 | 1 | 0 | 0 | 4 |
| rps24      | 1 | 1 | 1 | 0 | 0 | 0 | 1 | 4 |
| col8a1     | 1 | 1 | 0 | 0 | 1 | 0 | 1 | 4 |
| nhp2       | 1 | 1 | 0 | 0 | 1 | 0 | 1 | 4 |
| ppp2r5b    | 1 | 0 | 0 | 0 | 1 | 1 | 1 | 4 |
| sfpq       | 1 | 1 | 0 | 0 | 0 | 1 | 1 | 4 |
| pqlc3      | 1 | 1 | 0 | 0 | 1 | 0 | 1 | 4 |
| slc52a2    | 1 | 1 | 1 | 0 | 1 | 0 | 0 | 4 |
| itgb1bp1   | 1 | 1 | 1 | 0 | 1 | 0 | 0 | 4 |
| ncapd2     | 1 | 0 | 0 | 0 | 1 | 1 | 1 | 4 |
| inafm2     | 1 | 1 | 1 | 0 | 1 | 0 | 0 | 4 |
| tmem168    | 1 | 1 | 1 | 0 | 0 | 1 | 0 | 4 |
| gpatch4    | 1 | 1 | 1 | 0 | 0 | 0 | 1 | 4 |
| cited2     | 1 | 1 | 1 | 0 | 0 | 1 | 0 | 4 |
| wdr5       | 1 | 1 | 1 | 0 | 0 | 0 | 1 | 4 |
| jun        | 1 | 1 | 1 | 0 | 1 | 0 | 0 | 4 |

|          |   |   |   |   |   |   |   |   |
|----------|---|---|---|---|---|---|---|---|
| aldh6a1  | 1 | 0 | 1 | 0 | 1 | 0 | 1 | 4 |
| pask     | 1 | 0 | 0 | 0 | 1 | 1 | 1 | 4 |
| wdr3     | 1 | 0 | 1 | 0 | 0 | 1 | 1 | 4 |
| fam13b   | 1 | 1 | 1 | 0 | 1 | 0 | 0 | 4 |
| spdl1    | 1 | 1 | 0 | 0 | 1 | 0 | 1 | 4 |
| serping1 | 1 | 0 | 0 | 0 | 1 | 1 | 1 | 4 |
| tmem106b | 1 | 1 | 0 | 1 | 1 | 0 | 0 | 4 |
| cox5b    | 1 | 1 | 0 | 0 | 1 | 0 | 1 | 4 |
| jmy      | 1 | 1 | 0 | 0 | 1 | 1 | 0 | 4 |
| psma5    | 1 | 1 | 1 | 0 | 0 | 0 | 1 | 4 |
| gtf3a    | 1 | 1 | 1 | 0 | 0 | 0 | 1 | 4 |
| carhsp1  | 1 | 1 | 0 | 0 | 0 | 1 | 1 | 4 |
| armcx3   | 1 | 1 | 1 | 0 | 1 | 0 | 0 | 4 |
| rpp40    | 1 | 0 | 1 | 0 | 0 | 1 | 1 | 4 |
| pbx1     | 1 | 0 | 1 | 0 | 1 | 1 | 0 | 4 |
| dtl      | 1 | 1 | 0 | 0 | 0 | 1 | 1 | 4 |
| elf1ax   | 1 | 1 | 1 | 0 | 0 | 0 | 1 | 4 |
| ahsa1    | 1 | 1 | 1 | 0 | 0 | 0 | 1 | 4 |
| tomm20   | 1 | 1 | 1 | 0 | 0 | 0 | 1 | 4 |
| psme3    | 1 | 1 | 1 | 0 | 0 | 0 | 1 | 4 |
| pex7     | 1 | 1 | 0 | 0 | 1 | 0 | 1 | 4 |
| fam213a  | 1 | 0 | 0 | 0 | 1 | 1 | 1 | 4 |
| hspe1    | 1 | 1 | 1 | 0 | 0 | 0 | 1 | 4 |
| rftn1    | 1 | 0 | 1 | 0 | 1 | 0 | 1 | 4 |
| zwint    | 0 | 1 | 0 | 0 | 1 | 1 | 1 | 4 |
| il2rg    | 0 | 1 | 0 | 0 | 1 | 1 | 1 | 4 |
| nars     | 0 | 1 | 0 | 0 | 1 | 1 | 1 | 4 |
| cebpb    | 0 | 1 | 1 | 1 | 0 | 0 | 1 | 4 |
| mcm2     | 0 | 1 | 0 | 0 | 1 | 1 | 1 | 4 |
| emb      | 0 | 1 | 0 | 1 | 1 | 0 | 1 | 4 |
| slc7a5   | 0 | 1 | 1 | 0 | 1 | 1 | 0 | 4 |
| timp2    | 0 | 1 | 1 | 0 | 1 | 0 | 1 | 4 |
| pttg1    | 0 | 1 | 0 | 0 | 1 | 1 | 1 | 4 |
| reep5    | 0 | 1 | 0 | 0 | 1 | 1 | 1 | 4 |
| mcm6     | 0 | 1 | 0 | 0 | 1 | 1 | 1 | 4 |
| trim37   | 0 | 1 | 0 | 0 | 1 | 1 | 1 | 4 |
| tmem97   | 0 | 1 | 1 | 0 | 0 | 1 | 1 | 4 |
| syne2    | 0 | 1 | 1 | 0 | 1 | 0 | 1 | 4 |
| pmm2     | 0 | 1 | 1 | 0 | 0 | 1 | 1 | 4 |
| ldha     | 0 | 1 | 1 | 0 | 0 | 1 | 1 | 4 |
| elovl1   | 0 | 1 | 0 | 0 | 1 | 1 | 1 | 4 |
| acat2    | 0 | 1 | 0 | 0 | 1 | 1 | 1 | 4 |
| hs6st2   | 0 | 1 | 0 | 0 | 1 | 1 | 1 | 4 |
| tpx2     | 0 | 1 | 0 | 0 | 1 | 1 | 1 | 4 |
| ccnb2    | 0 | 1 | 1 | 0 | 0 | 1 | 1 | 4 |

|          |   |   |   |   |   |   |   |   |
|----------|---|---|---|---|---|---|---|---|
| nap1l1   | 0 | 1 | 1 | 0 | 1 | 0 | 1 | 4 |
| utp6     | 0 | 1 | 1 | 0 | 0 | 1 | 1 | 4 |
| hsp90ab1 | 0 | 1 | 1 | 0 | 1 | 0 | 1 | 4 |
| fam129a  | 0 | 1 | 1 | 0 | 0 | 1 | 1 | 4 |
| noc3l    | 0 | 1 | 1 | 0 | 0 | 1 | 1 | 4 |
| nrep     | 0 | 1 | 0 | 1 | 1 | 1 | 0 | 4 |
| rflk     | 0 | 1 | 1 | 0 | 1 | 0 | 1 | 4 |
| pstpip2  | 0 | 1 | 0 | 0 | 1 | 1 | 1 | 4 |
| nme7     | 0 | 1 | 1 | 0 | 1 | 0 | 1 | 4 |
| trpt1    | 0 | 1 | 1 | 0 | 1 | 0 | 1 | 4 |
| anxa7    | 0 | 1 | 1 | 0 | 1 | 0 | 1 | 4 |
| top2a    | 0 | 1 | 1 | 0 | 0 | 1 | 1 | 4 |
| mybbp1a  | 0 | 1 | 1 | 0 | 1 | 0 | 1 | 4 |
| cdkn2c   | 0 | 1 | 1 | 0 | 1 | 1 | 0 | 4 |
| pcolce2  | 0 | 1 | 1 | 0 | 1 | 0 | 1 | 4 |
| zpr1     | 0 | 1 | 1 | 0 | 0 | 1 | 1 | 4 |
| cdc37l1  | 0 | 1 | 1 | 0 | 1 | 1 | 0 | 4 |
| maged2   | 0 | 1 | 1 | 0 | 0 | 1 | 1 | 4 |
| slc12a2  | 0 | 1 | 1 | 0 | 1 | 1 | 0 | 4 |
| cd55     | 0 | 1 | 1 | 0 | 1 | 1 | 0 | 4 |
| cdca7    | 0 | 1 | 0 | 0 | 1 | 1 | 1 | 4 |
| frat2    | 0 | 1 | 1 | 1 | 1 | 0 | 0 | 4 |
| cdc25a   | 0 | 1 | 1 | 0 | 1 | 0 | 1 | 4 |
| smpdl3b  | 0 | 1 | 0 | 0 | 1 | 1 | 1 | 4 |
| slc25a33 | 0 | 1 | 1 | 0 | 1 | 0 | 1 | 4 |
| nudt19   | 0 | 1 | 1 | 0 | 1 | 0 | 1 | 4 |
| parp1    | 0 | 1 | 0 | 0 | 1 | 1 | 1 | 4 |
| slc39a14 | 0 | 1 | 1 | 0 | 1 | 0 | 1 | 4 |
| ect2     | 0 | 1 | 0 | 0 | 1 | 1 | 1 | 4 |
| dhrr7    | 0 | 1 | 1 | 0 | 1 | 0 | 1 | 4 |
| sh3bp5   | 0 | 1 | 1 | 0 | 1 | 0 | 1 | 4 |
| kdelr2   | 0 | 1 | 1 | 0 | 1 | 0 | 1 | 4 |
| tip1     | 0 | 1 | 0 | 1 | 1 | 0 | 1 | 4 |
| slc1a5   | 0 | 1 | 1 | 0 | 1 | 0 | 1 | 4 |
| nufip1   | 0 | 1 | 1 | 0 | 0 | 1 | 1 | 4 |
| dnaja3   | 0 | 1 | 1 | 0 | 1 | 1 | 0 | 4 |
| maged1   | 0 | 1 | 0 | 1 | 0 | 1 | 1 | 4 |
| appl2    | 0 | 1 | 1 | 0 | 1 | 0 | 1 | 4 |
| polr3gl  | 0 | 1 | 1 | 0 | 1 | 0 | 1 | 4 |
| fam43a   | 0 | 1 | 1 | 0 | 0 | 1 | 1 | 4 |
| rgs2     | 0 | 1 | 1 | 0 | 0 | 1 | 1 | 4 |
| rabggtb  | 0 | 1 | 1 | 0 | 0 | 1 | 1 | 4 |
| odc1     | 0 | 1 | 1 | 0 | 1 | 0 | 1 | 4 |
| egr1     | 0 | 0 | 1 | 0 | 1 | 1 | 1 | 4 |
| cth      | 0 | 0 | 1 | 0 | 1 | 1 | 1 | 4 |



|          |   |   |   |   |   |   |   |   |
|----------|---|---|---|---|---|---|---|---|
| pus7     | 0 | 0 | 1 | 0 | 1 | 1 | 1 | 4 |
| slc25a32 | 0 | 0 | 1 | 0 | 1 | 1 | 1 | 4 |
| arg2     | 0 | 0 | 1 | 1 | 1 | 1 | 0 | 4 |
| sqrcl    | 0 | 0 | 0 | 1 | 1 | 1 | 1 | 4 |
| ppp1r3c  | 0 | 0 | 0 | 1 | 1 | 1 | 1 | 4 |
| exo1     | 0 | 0 | 0 | 1 | 1 | 1 | 1 | 4 |
| pcdhb13  | 1 | 0 | 0 | 0 | 0 | 1 | 1 | 3 |
| mast4    | 1 | 0 | 0 | 1 | 1 | 0 | 0 | 3 |
| gdf15    | 1 | 0 | 0 | 0 | 0 | 1 | 1 | 3 |
| mov10    | 1 | 0 | 1 | 0 | 0 | 1 | 0 | 3 |
| cdk6     | 1 | 0 | 0 | 0 | 1 | 0 | 1 | 3 |
| psmg4    | 1 | 1 | 1 | 0 | 0 | 0 | 0 | 3 |
| isyna1   | 1 | 1 | 0 | 0 | 0 | 0 | 1 | 3 |
| fam134b  | 1 | 1 | 0 | 0 | 1 | 0 | 0 | 3 |
| arhgef37 | 1 | 0 | 1 | 0 | 0 | 1 | 0 | 3 |
| slc37a1  | 1 | 0 | 0 | 0 | 1 | 1 | 0 | 3 |
| nfkbia   | 1 | 0 | 0 | 0 | 1 | 1 | 0 | 3 |
| cdk14    | 1 | 1 | 0 | 0 | 0 | 1 | 0 | 3 |
| cd40     | 1 | 1 | 0 | 0 | 1 | 0 | 0 | 3 |
| slc19a1  | 1 | 0 | 1 | 0 | 0 | 0 | 1 | 3 |
| meltf    | 1 | 0 | 1 | 0 | 0 | 1 | 0 | 3 |
| nup210   | 1 | 1 | 0 | 0 | 1 | 0 | 0 | 3 |
| tro      | 1 | 1 | 0 | 0 | 1 | 0 | 0 | 3 |
| ehd1     | 1 | 1 | 0 | 0 | 0 | 1 | 0 | 3 |
| arhgef12 | 1 | 0 | 1 | 0 | 1 | 0 | 0 | 3 |
| ap1g2    | 1 | 1 | 0 | 0 | 0 | 0 | 1 | 3 |
| calca    | 1 | 1 | 0 | 0 | 1 | 0 | 0 | 3 |
| kif22    | 1 | 0 | 0 | 0 | 1 | 0 | 1 | 3 |
| dtmb     | 1 | 1 | 0 | 0 | 1 | 0 | 0 | 3 |
| hist3h2a | 1 | 1 | 0 | 0 | 0 | 0 | 1 | 3 |
| ssu72    | 1 | 1 | 0 | 0 | 0 | 0 | 1 | 3 |
| nin      | 1 | 1 | 0 | 0 | 0 | 0 | 1 | 3 |
| slc15a4  | 1 | 1 | 1 | 0 | 0 | 0 | 0 | 3 |
| farp1    | 1 | 1 | 0 | 0 | 1 | 0 | 0 | 3 |
| rbbp6    | 1 | 1 | 0 | 0 | 0 | 0 | 1 | 3 |
| psmd4    | 1 | 1 | 0 | 0 | 0 | 0 | 1 | 3 |
| ptprc    | 1 | 0 | 1 | 0 | 1 | 0 | 0 | 3 |
| vamp1    | 1 | 0 | 0 | 0 | 1 | 1 | 0 | 3 |
| yme1l1   | 1 | 1 | 0 | 0 | 0 | 1 | 0 | 3 |
| fam19a5  | 1 | 1 | 0 | 0 | 0 | 0 | 1 | 3 |
| chst15   | 1 | 0 | 0 | 0 | 1 | 0 | 1 | 3 |
| cep104   | 1 | 1 | 0 | 0 | 0 | 1 | 0 | 3 |
| agfg1    | 1 | 1 | 0 | 0 | 1 | 0 | 0 | 3 |
| tlcd2    | 1 | 1 | 0 | 0 | 1 | 0 | 0 | 3 |
| atf5     | 1 | 1 | 0 | 0 | 0 | 0 | 1 | 3 |

|          |   |   |   |   |   |   |   |   |
|----------|---|---|---|---|---|---|---|---|
| parp3    | 1 | 0 | 0 | 0 | 1 | 0 | 1 | 3 |
| fer      | 1 | 1 | 0 | 0 | 1 | 0 | 0 | 3 |
| taf6l    | 1 | 1 | 0 | 0 | 0 | 0 | 1 | 3 |
| epb41l1  | 1 | 1 | 0 | 0 | 1 | 0 | 0 | 3 |
| avil     | 1 | 1 | 1 | 0 | 0 | 0 | 0 | 3 |
| grk6     | 1 | 0 | 0 | 0 | 1 | 0 | 1 | 3 |
| fam104a  | 1 | 1 | 0 | 0 | 0 | 0 | 1 | 3 |
| syt9     | 1 | 1 | 0 | 0 | 1 | 0 | 0 | 3 |
| arhgap44 | 1 | 0 | 0 | 0 | 1 | 0 | 1 | 3 |
| nt5c     | 1 | 1 | 0 | 0 | 1 | 0 | 0 | 3 |
| nr2f1    | 1 | 1 | 1 | 0 | 0 | 0 | 0 | 3 |
| arfrp1   | 1 | 1 | 0 | 0 | 0 | 0 | 1 | 3 |
| dnajc4   | 1 | 0 | 1 | 0 | 1 | 0 | 0 | 3 |
| auts2    | 1 | 1 | 0 | 0 | 1 | 0 | 0 | 3 |
| mical2   | 1 | 0 | 0 | 0 | 0 | 1 | 1 | 3 |
| os9      | 1 | 1 | 0 | 0 | 0 | 0 | 1 | 3 |
| pcp4     | 1 | 1 | 0 | 0 | 1 | 0 | 0 | 3 |
| atf2     | 1 | 1 | 0 | 0 | 0 | 0 | 1 | 3 |
| trio     | 1 | 1 | 0 | 0 | 1 | 0 | 0 | 3 |
| ptpn6    | 1 | 1 | 0 | 0 | 1 | 0 | 0 | 3 |
| jag1     | 1 | 0 | 1 | 0 | 0 | 1 | 0 | 3 |
| cntrob   | 1 | 1 | 0 | 0 | 0 | 0 | 1 | 3 |
| usp37    | 1 | 0 | 0 | 0 | 1 | 0 | 1 | 3 |
| stx2     | 1 | 0 | 0 | 0 | 1 | 1 | 0 | 3 |
| fam83h   | 1 | 0 | 0 | 1 | 1 | 0 | 0 | 3 |
| pdlim5   | 1 | 1 | 0 | 0 | 0 | 1 | 0 | 3 |
| irak1    | 1 | 1 | 1 | 0 | 0 | 0 | 0 | 3 |
| opa3     | 1 | 1 | 0 | 0 | 0 | 0 | 1 | 3 |
| st3gal6  | 1 | 0 | 0 | 0 | 1 | 1 | 0 | 3 |
| fbrsl1   | 1 | 0 | 0 | 0 | 1 | 0 | 1 | 3 |
| epha1    | 1 | 0 | 0 | 0 | 1 | 0 | 1 | 3 |
| usp49    | 1 | 0 | 0 | 0 | 1 | 1 | 0 | 3 |
| slc1a1   | 1 | 1 | 0 | 0 | 0 | 1 | 0 | 3 |
| spire2   | 1 | 1 | 0 | 0 | 0 | 0 | 1 | 3 |
| cadm4    | 1 | 0 | 0 | 0 | 0 | 1 | 1 | 3 |
| hs3st3b1 | 1 | 0 | 1 | 0 | 1 | 0 | 0 | 3 |
| nsun6    | 1 | 1 | 0 | 0 | 0 | 0 | 1 | 3 |
| sptlc2   | 1 | 1 | 0 | 0 | 1 | 0 | 0 | 3 |
| fam84a   | 1 | 1 | 0 | 0 | 0 | 1 | 0 | 3 |
| gtf2f1   | 1 | 1 | 0 | 0 | 0 | 0 | 1 | 3 |
| trafd1   | 1 | 0 | 1 | 0 | 0 | 0 | 1 | 3 |
| ap2a2    | 1 | 1 | 0 | 0 | 0 | 0 | 1 | 3 |
| rab40b   | 1 | 1 | 0 | 0 | 1 | 0 | 0 | 3 |
| aurkb    | 1 | 0 | 0 | 0 | 0 | 1 | 1 | 3 |
| tpm3     | 1 | 1 | 0 | 0 | 0 | 0 | 1 | 3 |

|          |   |   |   |   |   |   |   |   |
|----------|---|---|---|---|---|---|---|---|
| parvb    | 1 | 0 | 1 | 0 | 1 | 0 | 0 | 3 |
| pld1     | 1 | 1 | 1 | 0 | 0 | 0 | 0 | 3 |
| rfx3     | 1 | 0 | 1 | 0 | 1 | 0 | 0 | 3 |
| grik5    | 1 | 1 | 0 | 0 | 0 | 0 | 1 | 3 |
| lrig1    | 1 | 0 | 0 | 0 | 0 | 1 | 1 | 3 |
| pabpc1   | 1 | 1 | 0 | 0 | 0 | 0 | 1 | 3 |
| slc27a4  | 1 | 1 | 1 | 0 | 0 | 0 | 0 | 3 |
| marveld2 | 1 | 1 | 0 | 0 | 1 | 0 | 0 | 3 |
| mafk     | 1 | 1 | 1 | 0 | 0 | 0 | 0 | 3 |
| ankrd44  | 1 | 1 | 0 | 0 | 1 | 0 | 0 | 3 |
| aldh7a1  | 1 | 0 | 0 | 0 | 0 | 1 | 1 | 3 |
| pex16    | 1 | 1 | 0 | 0 | 1 | 0 | 0 | 3 |
| faf1     | 1 | 1 | 0 | 0 | 0 | 1 | 0 | 3 |
| mib1     | 1 | 1 | 0 | 0 | 0 | 0 | 1 | 3 |
| wnk1     | 1 | 1 | 0 | 0 | 0 | 0 | 1 | 3 |
| aebp1    | 1 | 0 | 0 | 0 | 1 | 0 | 1 | 3 |
| ids      | 1 | 1 | 1 | 0 | 0 | 0 | 0 | 3 |
| hspa4    | 1 | 1 | 0 | 0 | 0 | 0 | 1 | 3 |
| pappa    | 1 | 0 | 0 | 1 | 1 | 0 | 0 | 3 |
| sdsi     | 1 | 0 | 1 | 0 | 1 | 0 | 0 | 3 |
| scara5   | 1 | 1 | 0 | 0 | 1 | 0 | 0 | 3 |
| rbm19    | 1 | 1 | 0 | 0 | 0 | 0 | 1 | 3 |
| psen2    | 1 | 0 | 0 | 0 | 1 | 0 | 1 | 3 |
| igfbp5   | 1 | 0 | 0 | 0 | 0 | 1 | 1 | 3 |
| tfb2m    | 1 | 0 | 1 | 0 | 1 | 0 | 0 | 3 |
| pom121   | 1 | 1 | 0 | 0 | 0 | 0 | 1 | 3 |
| fubp1    | 1 | 1 | 0 | 0 | 0 | 0 | 1 | 3 |
| mvk      | 1 | 1 | 0 | 0 | 0 | 1 | 0 | 3 |
| krt19    | 1 | 0 | 0 | 0 | 1 | 0 | 1 | 3 |
| arx      | 1 | 1 | 0 | 0 | 0 | 0 | 1 | 3 |
| dr1      | 1 | 1 | 0 | 0 | 0 | 0 | 1 | 3 |
| stk24    | 1 | 1 | 0 | 0 | 0 | 1 | 0 | 3 |
| mpc1     | 1 | 1 | 0 | 0 | 1 | 0 | 0 | 3 |
| mbp      | 1 | 1 | 0 | 0 | 1 | 0 | 0 | 3 |
| nabp1    | 1 | 0 | 0 | 0 | 1 | 0 | 1 | 3 |
| pcm1     | 1 | 1 | 0 | 0 | 0 | 1 | 0 | 3 |
| slc7a1   | 1 | 0 | 1 | 0 | 1 | 0 | 0 | 3 |
| tnrc6c   | 1 | 1 | 1 | 0 | 0 | 0 | 0 | 3 |
| atp7a    | 1 | 1 | 0 | 0 | 0 | 1 | 0 | 3 |
| nppb     | 1 | 1 | 0 | 0 | 0 | 0 | 1 | 3 |
| fzr1     | 1 | 1 | 0 | 0 | 0 | 0 | 1 | 3 |
| nme5     | 1 | 0 | 0 | 0 | 1 | 0 | 1 | 3 |
| dennd5b  | 1 | 0 | 1 | 0 | 1 | 0 | 0 | 3 |
| por      | 1 | 1 | 0 | 0 | 1 | 0 | 0 | 3 |
| cald1    | 1 | 1 | 0 | 0 | 0 | 0 | 1 | 3 |

|         |   |   |   |   |   |   |   |   |
|---------|---|---|---|---|---|---|---|---|
| pyroxd2 | 1 | 0 | 1 | 0 | 0 | 1 | 0 | 3 |
| prkd2   | 1 | 1 | 1 | 0 | 0 | 0 | 0 | 3 |
| ncf4    | 1 | 0 | 0 | 0 | 1 | 0 | 1 | 3 |
| nadk    | 1 | 1 | 0 | 0 | 0 | 0 | 1 | 3 |
| ehd3    | 1 | 1 | 0 | 0 | 0 | 0 | 1 | 3 |
| ano1    | 1 | 0 | 0 | 0 | 1 | 1 | 0 | 3 |
| abtb1   | 1 | 1 | 0 | 0 | 0 | 0 | 1 | 3 |
| cdk18   | 1 | 0 | 0 | 0 | 1 | 0 | 1 | 3 |
| cbfb    | 1 | 1 | 0 | 0 | 0 | 0 | 1 | 3 |
| hgsnat  | 1 | 1 | 1 | 0 | 0 | 0 | 0 | 3 |
| fam131a | 1 | 1 | 0 | 0 | 0 | 0 | 1 | 3 |
| ipo4    | 1 | 0 | 0 | 0 | 1 | 1 | 0 | 3 |
| msra    | 1 | 1 | 0 | 0 | 1 | 0 | 0 | 3 |
| wdr46   | 1 | 0 | 0 | 0 | 0 | 1 | 1 | 3 |
| dlg1    | 1 | 1 | 0 | 0 | 1 | 0 | 0 | 3 |
| dnajc9  | 1 | 0 | 1 | 0 | 0 | 0 | 1 | 3 |
| parva   | 1 | 1 | 0 | 0 | 1 | 0 | 0 | 3 |
| bmp2k   | 1 | 1 | 0 | 0 | 1 | 0 | 0 | 3 |
| gfer    | 1 | 1 | 0 | 0 | 0 | 0 | 1 | 3 |
| eml6    | 1 | 1 | 0 | 0 | 0 | 0 | 1 | 3 |
| nos3    | 1 | 1 | 0 | 0 | 1 | 0 | 0 | 3 |
| adh7    | 1 | 1 | 0 | 0 | 0 | 0 | 1 | 3 |
| pik3c2a | 1 | 1 | 0 | 0 | 1 | 0 | 0 | 3 |
| smc1a   | 1 | 1 | 0 | 0 | 0 | 0 | 1 | 3 |
| cchcr1  | 1 | 0 | 1 | 0 | 0 | 0 | 1 | 3 |
| tcf3    | 1 | 0 | 1 | 0 | 0 | 0 | 1 | 3 |
| pdgfc   | 1 | 0 | 0 | 0 | 1 | 1 | 0 | 3 |
| inpp5a  | 1 | 1 | 0 | 0 | 1 | 0 | 0 | 3 |
| pvr     | 1 | 1 | 0 | 0 | 0 | 0 | 1 | 3 |
| p2rx6   | 1 | 0 | 0 | 0 | 1 | 0 | 1 | 3 |
| dnajc21 | 1 | 1 | 0 | 0 | 1 | 0 | 0 | 3 |
| trip11  | 1 | 1 | 0 | 0 | 1 | 0 | 0 | 3 |
| itgb4   | 1 | 1 | 0 | 0 | 1 | 0 | 0 | 3 |
| pck2    | 1 | 1 | 0 | 0 | 0 | 1 | 0 | 3 |
| meg3    | 1 | 1 | 0 | 0 | 1 | 0 | 0 | 3 |
| cenpi   | 1 | 0 | 0 | 0 | 1 | 1 | 0 | 3 |
| cpsf3l  | 1 | 1 | 0 | 0 | 0 | 0 | 1 | 3 |
| tmem156 | 1 | 0 | 1 | 0 | 1 | 0 | 0 | 3 |
| usp36   | 1 | 0 | 1 | 0 | 0 | 1 | 0 | 3 |
| synj2   | 1 | 0 | 1 | 1 | 0 | 0 | 0 | 3 |
| igsf3   | 1 | 0 | 0 | 0 | 1 | 0 | 1 | 3 |
| il21r   | 1 | 0 | 1 | 0 | 1 | 0 | 0 | 3 |
| c3orf58 | 1 | 0 | 1 | 0 | 0 | 1 | 0 | 3 |
| prkcb   | 1 | 1 | 1 | 0 | 0 | 0 | 0 | 3 |
| mmd2    | 1 | 1 | 0 | 0 | 1 | 0 | 0 | 3 |

|          |   |   |   |   |   |   |   |   |
|----------|---|---|---|---|---|---|---|---|
| ptpn11   | 1 | 0 | 0 | 0 | 1 | 0 | 1 | 3 |
| mtf1     | 1 | 0 | 1 | 0 | 0 | 0 | 1 | 3 |
| trpv4    | 1 | 0 | 0 | 0 | 1 | 1 | 0 | 3 |
| cenpv    | 1 | 1 | 1 | 0 | 0 | 0 | 0 | 3 |
| traip    | 1 | 0 | 0 | 0 | 1 | 0 | 1 | 3 |
| dusp9    | 1 | 1 | 0 | 0 | 0 | 0 | 1 | 3 |
| b3galt2  | 1 | 0 | 1 | 0 | 1 | 0 | 0 | 3 |
| il27ra   | 1 | 0 | 0 | 0 | 1 | 1 | 0 | 3 |
| pdxk     | 1 | 0 | 0 | 1 | 0 | 0 | 1 | 3 |
| slc25a53 | 1 | 1 | 0 | 0 | 1 | 0 | 0 | 3 |
| cyhr1    | 1 | 1 | 0 | 0 | 0 | 0 | 1 | 3 |
| inhbe    | 1 | 0 | 1 | 0 | 0 | 1 | 0 | 3 |
| sec61a1  | 1 | 0 | 0 | 0 | 1 | 0 | 1 | 3 |
| cln6     | 1 | 0 | 1 | 0 | 0 | 1 | 0 | 3 |
| adi1     | 1 | 1 | 1 | 0 | 0 | 0 | 0 | 3 |
| gnptab   | 1 | 1 | 0 | 0 | 1 | 0 | 0 | 3 |
| samm50   | 1 | 0 | 0 | 0 | 1 | 0 | 1 | 3 |
| mmaa     | 1 | 1 | 0 | 0 | 1 | 0 | 0 | 3 |
| mettl9   | 1 | 1 | 1 | 0 | 0 | 0 | 0 | 3 |
| tnfrsf1b | 1 | 0 | 1 | 0 | 1 | 0 | 0 | 3 |
| foxs1    | 1 | 0 | 0 | 0 | 1 | 0 | 1 | 3 |
| gtf2a1   | 1 | 1 | 1 | 0 | 0 | 0 | 0 | 3 |
| acox1    | 1 | 1 | 0 | 0 | 1 | 0 | 0 | 3 |
| cdyl     | 1 | 1 | 0 | 0 | 0 | 1 | 0 | 3 |
| tlcd1    | 1 | 0 | 0 | 0 | 1 | 0 | 1 | 3 |
| lhx9     | 1 | 0 | 1 | 0 | 0 | 0 | 1 | 3 |
| cep131   | 1 | 1 | 0 | 0 | 1 | 0 | 0 | 3 |
| cntnap2  | 1 | 1 | 0 | 0 | 1 | 0 | 0 | 3 |
| jmjd1c   | 1 | 1 | 1 | 0 | 0 | 0 | 0 | 3 |
| trim8    | 1 | 1 | 0 | 0 | 0 | 0 | 1 | 3 |
| rtkn     | 1 | 0 | 0 | 0 | 1 | 0 | 1 | 3 |
| myef2    | 1 | 1 | 0 | 0 | 0 | 0 | 1 | 3 |
| gtf2i    | 1 | 1 | 0 | 0 | 1 | 0 | 0 | 3 |
| srek1ip1 | 1 | 1 | 1 | 0 | 0 | 0 | 0 | 3 |
| slc1a2   | 1 | 1 | 0 | 0 | 0 | 1 | 0 | 3 |
| celf2    | 1 | 0 | 1 | 0 | 1 | 0 | 0 | 3 |
| rad51d   | 1 | 1 | 0 | 0 | 1 | 0 | 0 | 3 |
| chgb     | 1 | 1 | 0 | 1 | 0 | 0 | 0 | 3 |
| epb41l4b | 1 | 0 | 0 | 0 | 1 | 1 | 0 | 3 |
| padi2    | 1 | 0 | 0 | 0 | 1 | 1 | 0 | 3 |
| gm2a     | 1 | 1 | 0 | 0 | 0 | 1 | 0 | 3 |
| fbxw9    | 1 | 1 | 0 | 0 | 0 | 0 | 1 | 3 |
| adtrp    | 1 | 1 | 0 | 0 | 1 | 0 | 0 | 3 |
| sptbn1   | 1 | 1 | 0 | 0 | 0 | 0 | 1 | 3 |
| kank2    | 1 | 0 | 0 | 0 | 1 | 1 | 0 | 3 |

|          |   |   |   |   |   |   |   |   |
|----------|---|---|---|---|---|---|---|---|
| rassf3   | 1 | 1 | 0 | 0 | 0 | 0 | 1 | 3 |
| muc4     | 1 | 0 | 0 | 1 | 1 | 0 | 0 | 3 |
| ntmt1    | 1 | 1 | 1 | 0 | 0 | 0 | 0 | 3 |
| cep290   | 1 | 0 | 0 | 0 | 0 | 1 | 1 | 3 |
| erbb3    | 1 | 1 | 0 | 0 | 1 | 0 | 0 | 3 |
| plekha8  | 1 | 0 | 1 | 1 | 0 | 0 | 0 | 3 |
| itgb2    | 1 | 0 | 0 | 0 | 1 | 1 | 0 | 3 |
| nags     | 1 | 0 | 1 | 1 | 0 | 0 | 0 | 3 |
| csnk1a1  | 1 | 1 | 1 | 0 | 0 | 0 | 0 | 3 |
| prpsap1  | 1 | 1 | 1 | 0 | 0 | 0 | 0 | 3 |
| ss18     | 1 | 0 | 1 | 0 | 1 | 0 | 0 | 3 |
| kdm5b    | 1 | 1 | 0 | 0 | 1 | 0 | 0 | 3 |
| il3ra    | 1 | 1 | 0 | 0 | 0 | 0 | 1 | 3 |
| kif5c    | 1 | 1 | 0 | 0 | 1 | 0 | 0 | 3 |
| pid1     | 1 | 0 | 0 | 0 | 1 | 0 | 1 | 3 |
| hdlbp    | 1 | 1 | 0 | 0 | 1 | 0 | 0 | 3 |
| exog     | 1 | 0 | 1 | 0 | 1 | 0 | 0 | 3 |
| whsc1    | 1 | 0 | 1 | 0 | 1 | 0 | 0 | 3 |
| myo7a    | 1 | 1 | 0 | 0 | 1 | 0 | 0 | 3 |
| azin1    | 1 | 1 | 0 | 0 | 0 | 0 | 1 | 3 |
| mphosph9 | 1 | 1 | 1 | 0 | 0 | 0 | 0 | 3 |
| rcn3     | 1 | 1 | 0 | 0 | 0 | 0 | 1 | 3 |
| nup50    | 1 | 1 | 0 | 0 | 0 | 0 | 1 | 3 |
| cers4    | 1 | 1 | 0 | 0 | 1 | 0 | 0 | 3 |
| dhx30    | 1 | 1 | 0 | 1 | 0 | 0 | 0 | 3 |
| ncaph2   | 1 | 0 | 0 | 0 | 1 | 0 | 1 | 3 |
| ckap2l   | 1 | 0 | 0 | 0 | 0 | 1 | 1 | 3 |
| aprt     | 1 | 1 | 0 | 0 | 0 | 0 | 1 | 3 |
| mta1     | 1 | 1 | 1 | 0 | 0 | 0 | 0 | 3 |
| irf6     | 1 | 1 | 0 | 0 | 1 | 0 | 0 | 3 |
| socs3    | 1 | 1 | 0 | 0 | 0 | 0 | 1 | 3 |
| nfx1     | 1 | 1 | 0 | 0 | 0 | 1 | 0 | 3 |
| dnaja4   | 1 | 1 | 0 | 0 | 1 | 0 | 0 | 3 |
| fzd2     | 1 | 1 | 0 | 0 | 0 | 1 | 0 | 3 |
| itgb7    | 1 | 0 | 0 | 0 | 1 | 0 | 1 | 3 |
| vrk1     | 1 | 1 | 0 | 0 | 0 | 0 | 1 | 3 |
| rnf125   | 1 | 0 | 1 | 0 | 0 | 1 | 0 | 3 |
| pcgf3    | 1 | 0 | 0 | 0 | 1 | 0 | 1 | 3 |
| slc29a2  | 1 | 0 | 0 | 0 | 0 | 1 | 1 | 3 |
| senp6    | 1 | 1 | 0 | 0 | 0 | 1 | 0 | 3 |
| pwp2     | 1 | 0 | 1 | 0 | 0 | 0 | 1 | 3 |
| akap12   | 1 | 1 | 0 | 0 | 0 | 0 | 1 | 3 |
| krt6b    | 1 | 1 | 0 | 0 | 0 | 1 | 0 | 3 |
| tgif1    | 1 | 1 | 0 | 0 | 1 | 0 | 0 | 3 |
| pcdhb6   | 1 | 0 | 1 | 1 | 0 | 0 | 0 | 3 |

|         |   |   |   |   |   |   |   |   |
|---------|---|---|---|---|---|---|---|---|
| pcyt2   | 1 | 1 | 0 | 0 | 1 | 0 | 0 | 3 |
| lims2   | 1 | 1 | 0 | 0 | 1 | 0 | 0 | 3 |
| acsbg1  | 1 | 1 | 0 | 0 | 0 | 0 | 1 | 3 |
| exoc7   | 1 | 1 | 1 | 0 | 0 | 0 | 0 | 3 |
| scd     | 1 | 0 | 1 | 0 | 0 | 1 | 0 | 3 |
| plxnc1  | 1 | 1 | 1 | 0 | 0 | 0 | 0 | 3 |
| msi2    | 1 | 1 | 0 | 0 | 0 | 0 | 1 | 3 |
| nhsl1   | 1 | 0 | 0 | 1 | 1 | 0 | 0 | 3 |
| rfwd3   | 1 | 0 | 0 | 0 | 1 | 0 | 1 | 3 |
| nfia    | 1 | 0 | 1 | 0 | 1 | 0 | 0 | 3 |
| cep162  | 1 | 0 | 1 | 0 | 1 | 0 | 0 | 3 |
| aftph   | 1 | 1 | 0 | 0 | 0 | 1 | 0 | 3 |
| tnfaip8 | 1 | 1 | 1 | 0 | 0 | 0 | 0 | 3 |
| anp32e  | 1 | 1 | 0 | 0 | 0 | 0 | 1 | 3 |
| ranbp1  | 1 | 0 | 1 | 0 | 0 | 0 | 1 | 3 |
