# Supplementary material for: Intersection of the Orphan G Protein-Coupled Receptor, GPR19, with the Aging Process
Source: MDPI journal article supplement (doi:10.3390/ijms232113598), 2022-11-06
Supplement: s1 [file s1]

**Table S2.** Gene Expression Omnibus (GEO) GPR19 associated datasets demonstrating downregulation. The specific GEO datasets (GSE) are indicated and the presence of the associated Gene Symbol for a transcript measured is shown in the different columns.

| Gene Symbol | GSE14428 | GSE16048 | GSE37894 | GSE47363 | GSE28598 | GSE14773 | GSE49185 | GSE5668 | GSE23031 | Common Sets |
|-------------|----------|----------|----------|----------|----------|----------|----------|---------|----------|-------------|
| gpr19       | 1        | 1        | 1        | 1        | 1        | 1        | 1        | 1       | 1        | 9           |
| aurkb       | 1        | 0        | 1        | 1        | 1        | 1        | 1        | 1       | 1        | 8           |
| ctsb        | 1        | 1        | 1        | 1        | 1        | 1        | 0        | 1       | 1        | 8           |
| fscn1       | 1        | 0        | 1        | 1        | 1        | 1        | 1        | 1       | 1        | 8           |
| gart        | 1        | 0        | 1        | 1        | 1        | 1        | 1        | 1       | 1        | 8           |
| gsg2        | 1        | 0        | 1        | 1        | 1        | 1        | 1        | 1       | 1        | 8           |
| plpp3       | 1        | 0        | 1        | 1        | 1        | 1        | 1        | 1       | 1        | 8           |
| tmpo        | 1        | 0        | 1        | 1        | 1        | 1        | 1        | 1       | 1        | 8           |
| smim19      | 1        | 0        | 1        | 1        | 1        | 1        | 1        | 1       | 1        | 8           |
| fam102a     | 1        | 0        | 1        | 1        | 1        | 1        | 1        | 1       | 1        | 8           |
| lamp2       | 1        | 0        | 1        | 1        | 1        | 1        | 1        | 1       | 1        | 8           |
| itgb3bp     | 1        | 0        | 1        | 1        | 1        | 1        | 1        | 1       | 1        | 8           |
| mkks        | 1        | 0        | 1        | 1        | 1        | 1        | 0        | 1       | 1        | 7           |
| atf4        | 1        | 0        | 1        | 0        | 1        | 1        | 1        | 1       | 1        | 7           |
| pprc1       | 1        | 0        | 1        | 0        | 1        | 1        | 1        | 1       | 1        | 7           |
| fdf1        | 1        | 0        | 0        | 1        | 1        | 1        | 1        | 1       | 1        | 7           |
| pbk         | 1        | 0        | 1        | 0        | 1        | 1        | 1        | 1       | 1        | 7           |
| pxmp2       | 1        | 0        | 1        | 0        | 1        | 1        | 1        | 1       | 1        | 7           |
| ifnar1      | 1        | 0        | 0        | 1        | 1        | 1        | 1        | 1       | 1        | 7           |
| ddit4       | 1        | 0        | 1        | 1        | 1        | 1        | 1        | 0       | 1        | 7           |
| cab39l      | 1        | 0        | 1        | 0        | 1        | 1        | 1        | 1       | 1        | 7           |
| ogfod3      | 1        | 0        | 1        | 1        | 1        | 1        | 0        | 1       | 1        | 7           |
| gphn        | 1        | 0        | 1        | 1        | 1        | 1        | 0        | 1       | 1        | 7           |
| tmem185b    | 1        | 0        | 1        | 0        | 1        | 1        | 1        | 1       | 1        | 7           |
| mthfd2      | 1        | 0        | 1        | 0        | 1        | 1        | 1        | 1       | 1        | 7           |
| poglut1     | 1        | 0        | 1        | 0        | 1        | 1        | 1        | 1       | 1        | 7           |
| smyd3       | 1        | 0        | 0        | 1        | 1        | 1        | 1        | 1       | 1        | 7           |
| msmo1       | 1        | 0        | 1        | 1        | 1        | 1        | 1        | 0       | 1        | 7           |
| pmpca       | 1        | 0        | 0        | 1        | 1        | 1        | 1        | 1       | 1        | 7           |
| rabl6       | 1        | 0        | 1        | 0        | 1        | 1        | 1        | 1       | 1        | 7           |
| rpa1        | 1        | 0        | 1        | 1        | 1        | 1        | 1        | 1       | 0        | 7           |
| zxdc        | 1        | 0        | 1        | 0        | 1        | 1        | 1        | 1       | 1        | 7           |
| vrk1        | 1        | 0        | 1        | 0        | 1        | 1        | 1        | 1       | 1        | 7           |
| prkacb      | 1        | 0        | 1        | 1        | 1        | 1        | 1        | 0       | 1        | 7           |
| glg1        | 1        | 0        | 1        | 0        | 1        | 1        | 1        | 1       | 1        | 7           |
| mief1       | 1        | 0        | 1        | 1        | 1        | 1        | 0        | 1       | 1        | 7           |
| gnpda2      | 1        | 0        | 1        | 0        | 1        | 1        | 1        | 1       | 1        | 7           |
| palld       | 1        | 1        | 1        | 1        | 1        | 1        | 0        | 1       | 0        | 7           |
| gins3       | 1        | 0        | 0        | 1        | 1        | 1        | 1        | 1       | 1        | 7           |
| pdss2       | 1        | 0        | 0        | 1        | 1        | 1        | 1        | 1       | 1        | 7           |

|          |   |   |   |   |   |   |   |   |   |   |
|----------|---|---|---|---|---|---|---|---|---|---|
| cdk2ap2  | 1 | 0 | 1 | 0 | 1 | 1 | 1 | 1 | 1 | 7 |
| lrp8     | 1 | 0 | 1 | 1 | 1 | 1 | 1 | 0 | 1 | 7 |
| cyb561a3 | 1 | 0 | 0 | 1 | 1 | 1 | 1 | 1 | 1 | 7 |
| nacc2    | 1 | 1 | 1 | 1 | 1 | 0 | 0 | 1 | 1 | 7 |
| cggbp1   | 1 | 0 | 1 | 1 | 1 | 1 | 0 | 1 | 1 | 7 |
| pelp1    | 1 | 0 | 1 | 0 | 1 | 1 | 1 | 1 | 1 | 7 |
| pdzd8    | 1 | 1 | 1 | 1 | 1 | 1 | 0 | 1 | 0 | 7 |
| tbcd     | 1 | 0 | 0 | 1 | 1 | 1 | 1 | 1 | 1 | 7 |
| surf4    | 1 | 0 | 0 | 1 | 1 | 1 | 1 | 1 | 1 | 7 |
| coq2     | 1 | 0 | 1 | 0 | 1 | 1 | 1 | 1 | 1 | 7 |
| itsn1    | 1 | 0 | 1 | 1 | 1 | 1 | 0 | 1 | 1 | 7 |
| ctdsp2   | 1 | 0 | 1 | 0 | 1 | 1 | 1 | 1 | 1 | 7 |
| psat1    | 1 | 0 | 1 | 1 | 1 | 1 | 1 | 0 | 1 | 7 |
| dynlrb1  | 1 | 0 | 1 | 1 | 1 | 0 | 1 | 1 | 1 | 7 |
| acaa2    | 1 | 0 | 1 | 0 | 1 | 1 | 1 | 1 | 1 | 7 |
| msi2     | 1 | 0 | 1 | 1 | 1 | 1 | 1 | 0 | 1 | 7 |
| zcchc7   | 1 | 0 | 1 | 0 | 1 | 1 | 1 | 1 | 1 | 7 |
| aplp2    | 1 | 0 | 1 | 1 | 1 | 0 | 1 | 1 | 1 | 7 |
| snx5     | 1 | 0 | 0 | 1 | 1 | 1 | 1 | 1 | 1 | 7 |
| irak2    | 1 | 0 | 1 | 1 | 1 | 1 | 1 | 0 | 1 | 7 |
| plpp5    | 1 | 0 | 1 | 0 | 1 | 1 | 1 | 1 | 1 | 7 |
| mfng     | 1 | 0 | 1 | 1 | 1 | 1 | 0 | 1 | 1 | 7 |
| faap100  | 1 | 0 | 1 | 1 | 1 | 0 | 1 | 1 | 1 | 7 |
| enpp4    | 1 | 0 | 1 | 1 | 1 | 1 | 1 | 0 | 1 | 7 |
| rabgap1  | 1 | 0 | 1 | 1 | 1 | 1 | 1 | 1 | 0 | 7 |
| gsk3b    | 1 | 0 | 1 | 0 | 1 | 1 | 1 | 1 | 1 | 7 |
| mrps33   | 1 | 0 | 1 | 1 | 1 | 1 | 1 | 1 | 0 | 7 |
| pard6a   | 1 | 0 | 1 | 1 | 1 | 1 | 0 | 1 | 1 | 7 |
| p2rx4    | 1 | 0 | 1 | 1 | 1 | 0 | 1 | 1 | 1 | 7 |
| mapkap1  | 1 | 0 | 1 | 1 | 1 | 0 | 1 | 1 | 1 | 7 |
| mgll     | 1 | 0 | 1 | 1 | 1 | 1 | 1 | 0 | 1 | 7 |
| lgmn     | 0 | 1 | 1 | 1 | 1 | 0 | 1 | 1 | 1 | 7 |
| ahnak    | 0 | 1 | 1 | 1 | 1 | 1 | 1 | 0 | 1 | 7 |
| slc31a1  | 0 | 1 | 1 | 1 | 1 | 1 | 1 | 0 | 1 | 7 |
| il1rap   | 0 | 1 | 1 | 1 | 1 | 1 | 0 | 1 | 1 | 7 |
| ivd      | 0 | 1 | 1 | 0 | 1 | 1 | 1 | 1 | 1 | 7 |
| smad3    | 0 | 0 | 1 | 1 | 1 | 1 | 1 | 1 | 1 | 7 |
| hbp1     | 0 | 0 | 1 | 1 | 1 | 1 | 1 | 1 | 1 | 7 |
| mapkapk3 | 0 | 0 | 1 | 1 | 1 | 1 | 1 | 1 | 1 | 7 |
| bmpr2    | 0 | 0 | 1 | 1 | 1 | 1 | 1 | 1 | 1 | 7 |
| zmym3    | 0 | 0 | 1 | 1 | 1 | 1 | 1 | 1 | 1 | 7 |
| carhsp1  | 0 | 0 | 1 | 1 | 1 | 1 | 1 | 1 | 1 | 7 |
| vps41    | 0 | 0 | 1 | 1 | 1 | 1 | 1 | 1 | 1 | 7 |
| prmt1    | 0 | 0 | 1 | 1 | 1 | 1 | 1 | 1 | 1 | 7 |
| mcm5     | 0 | 0 | 1 | 1 | 1 | 1 | 1 | 1 | 1 | 7 |

|          |   |   |   |   |   |   |   |   |   |   |
|----------|---|---|---|---|---|---|---|---|---|---|
| ebp      | 0 | 0 | 1 | 1 | 1 | 1 | 1 | 1 | 1 | 7 |
| calu     | 0 | 0 | 1 | 1 | 1 | 1 | 1 | 1 | 1 | 7 |
| elk4     | 0 | 0 | 1 | 1 | 1 | 1 | 1 | 1 | 1 | 7 |
| aldh2    | 0 | 0 | 1 | 1 | 1 | 1 | 1 | 1 | 1 | 7 |
| sbno1    | 0 | 0 | 1 | 1 | 1 | 1 | 1 | 1 | 1 | 7 |
| ypel5    | 0 | 0 | 1 | 1 | 1 | 1 | 1 | 1 | 1 | 7 |
| cdc25a   | 0 | 0 | 1 | 1 | 1 | 1 | 1 | 1 | 1 | 7 |
| mprip    | 0 | 0 | 1 | 1 | 1 | 1 | 1 | 1 | 1 | 7 |
| ercc6l2  | 0 | 0 | 1 | 1 | 1 | 1 | 1 | 1 | 1 | 7 |
| gins2    | 0 | 0 | 1 | 1 | 1 | 1 | 1 | 1 | 1 | 7 |
| smc4     | 0 | 0 | 1 | 1 | 1 | 1 | 1 | 1 | 1 | 7 |
| nasp     | 0 | 0 | 1 | 1 | 1 | 1 | 1 | 1 | 1 | 7 |
| dnajc10  | 0 | 0 | 1 | 1 | 1 | 1 | 1 | 1 | 1 | 7 |
| elf2s2   | 0 | 0 | 1 | 1 | 1 | 1 | 1 | 1 | 1 | 7 |
| spc25    | 0 | 0 | 1 | 1 | 1 | 1 | 1 | 1 | 1 | 7 |
| aldh18a1 | 0 | 0 | 1 | 1 | 1 | 1 | 1 | 1 | 1 | 7 |
| nfat5    | 0 | 0 | 1 | 1 | 1 | 1 | 1 | 1 | 1 | 7 |
| bcl6     | 0 | 0 | 1 | 1 | 1 | 1 | 1 | 1 | 1 | 7 |
| lrpap1   | 0 | 0 | 1 | 1 | 1 | 1 | 1 | 1 | 1 | 7 |
| ino80c   | 0 | 0 | 1 | 1 | 1 | 1 | 1 | 1 | 1 | 7 |
| pdha1    | 0 | 0 | 1 | 1 | 1 | 1 | 1 | 1 | 1 | 7 |
| mmab     | 0 | 0 | 1 | 1 | 1 | 1 | 1 | 1 | 1 | 7 |
| tcf4     | 0 | 0 | 1 | 1 | 1 | 1 | 1 | 1 | 1 | 7 |
| polh     | 0 | 0 | 1 | 1 | 1 | 1 | 1 | 1 | 1 | 7 |
| ermp1    | 0 | 0 | 1 | 1 | 1 | 1 | 1 | 1 | 1 | 7 |
| nfia     | 0 | 0 | 1 | 1 | 1 | 1 | 1 | 1 | 1 | 7 |
| serpine2 | 0 | 0 | 1 | 1 | 1 | 1 | 1 | 1 | 1 | 7 |
| lmbr1    | 0 | 0 | 1 | 1 | 1 | 1 | 1 | 1 | 1 | 7 |
| dusp12   | 0 | 0 | 1 | 1 | 1 | 1 | 1 | 1 | 1 | 7 |
| sars     | 0 | 0 | 1 | 1 | 1 | 1 | 1 | 1 | 1 | 7 |
| h2afy    | 0 | 0 | 1 | 1 | 1 | 1 | 1 | 1 | 1 | 7 |
| slc41a3  | 0 | 0 | 1 | 1 | 1 | 1 | 1 | 1 | 1 | 7 |
| raf1     | 0 | 0 | 1 | 1 | 1 | 1 | 1 | 1 | 1 | 7 |
| myo19    | 0 | 0 | 1 | 1 | 1 | 1 | 1 | 1 | 1 | 7 |
| sh3gl1   | 0 | 0 | 1 | 1 | 1 | 1 | 1 | 1 | 1 | 7 |
| pip4k2b  | 0 | 0 | 1 | 1 | 1 | 1 | 1 | 1 | 1 | 7 |
| mcm2     | 0 | 0 | 1 | 1 | 1 | 1 | 1 | 1 | 1 | 7 |
| tpm4     | 0 | 0 | 1 | 1 | 1 | 1 | 1 | 1 | 1 | 7 |
| sh3glb1  | 0 | 0 | 1 | 1 | 1 | 1 | 1 | 1 | 1 | 7 |
| msrb1    | 0 | 0 | 1 | 1 | 1 | 1 | 1 | 1 | 1 | 7 |
| ets2     | 0 | 0 | 1 | 1 | 1 | 1 | 1 | 1 | 1 | 7 |
| fxr1     | 0 | 0 | 1 | 1 | 1 | 1 | 1 | 1 | 1 | 7 |
| sdcbp    | 0 | 0 | 1 | 1 | 1 | 1 | 1 | 1 | 1 | 7 |
| pkmyt1   | 0 | 0 | 1 | 1 | 1 | 1 | 1 | 1 | 1 | 7 |
| gna13    | 0 | 0 | 1 | 1 | 1 | 1 | 1 | 1 | 1 | 7 |

|          |   |   |   |   |   |   |   |   |   |   |
|----------|---|---|---|---|---|---|---|---|---|---|
| ivns1abp | 0 | 0 | 1 | 1 | 1 | 1 | 1 | 1 | 1 | 7 |
| zdhhc24  | 0 | 0 | 1 | 1 | 1 | 1 | 1 | 1 | 1 | 7 |
| sbf2     | 0 | 0 | 1 | 1 | 1 | 1 | 1 | 1 | 1 | 7 |
| bcl2l1   | 0 | 0 | 1 | 1 | 1 | 1 | 1 | 1 | 1 | 7 |
| plekha2  | 0 | 0 | 1 | 1 | 1 | 1 | 1 | 1 | 1 | 7 |
| map1lc3b | 0 | 0 | 1 | 1 | 1 | 1 | 1 | 1 | 1 | 7 |
| tom1l2   | 0 | 0 | 1 | 1 | 1 | 1 | 1 | 1 | 1 | 7 |
| tmcc1    | 0 | 0 | 1 | 1 | 1 | 1 | 1 | 1 | 1 | 7 |
| acer3    | 0 | 0 | 1 | 1 | 1 | 1 | 1 | 1 | 1 | 7 |
| ybx2     | 1 | 0 | 1 | 0 | 1 | 1 | 0 | 1 | 1 | 6 |
| snx10    | 1 | 0 | 1 | 1 | 1 | 1 | 0 | 0 | 1 | 6 |
| dpysl3   | 1 | 0 | 0 | 1 | 1 | 1 | 0 | 1 | 1 | 6 |
| dut      | 1 | 0 | 0 | 1 | 1 | 1 | 1 | 0 | 1 | 6 |
| sh3rf1   | 1 | 0 | 1 | 0 | 1 | 1 | 1 | 0 | 1 | 6 |
| snrpb    | 1 | 0 | 1 | 1 | 1 | 1 | 0 | 1 | 0 | 6 |
| rin2     | 1 | 0 | 1 | 1 | 1 | 0 | 0 | 1 | 1 | 6 |
| nup88    | 1 | 0 | 1 | 0 | 1 | 1 | 1 | 0 | 1 | 6 |
| gstk1    | 1 | 0 | 1 | 0 | 1 | 0 | 1 | 1 | 1 | 6 |
| rapgef1  | 1 | 0 | 1 | 1 | 1 | 0 | 0 | 1 | 1 | 6 |
| cbx6     | 1 | 0 | 1 | 1 | 1 | 1 | 0 | 0 | 1 | 6 |
| rfrng    | 1 | 0 | 0 | 1 | 1 | 1 | 1 | 1 | 0 | 6 |
| ppp2r2b  | 1 | 1 | 1 | 1 | 1 | 0 | 0 | 1 | 0 | 6 |
| asah1    | 1 | 0 | 1 | 0 | 1 | 1 | 0 | 1 | 1 | 6 |
| abr      | 1 | 0 | 1 | 1 | 1 | 1 | 1 | 0 | 0 | 6 |
| ppfibp2  | 1 | 0 | 1 | 1 | 0 | 1 | 0 | 1 | 1 | 6 |
| cds2     | 1 | 0 | 1 | 0 | 1 | 1 | 0 | 1 | 1 | 6 |
| tctex1d2 | 1 | 0 | 0 | 1 | 1 | 1 | 0 | 1 | 1 | 6 |
| ncor1    | 1 | 0 | 0 | 0 | 1 | 1 | 1 | 1 | 1 | 6 |
| sppl2a   | 1 | 0 | 0 | 0 | 1 | 1 | 1 | 1 | 1 | 6 |
| dusp16   | 1 | 0 | 0 | 0 | 1 | 1 | 1 | 1 | 1 | 6 |
| nmt2     | 1 | 0 | 0 | 1 | 1 | 1 | 0 | 1 | 1 | 6 |
| sec22a   | 1 | 0 | 1 | 0 | 1 | 1 | 0 | 1 | 1 | 6 |
| pde6d    | 1 | 0 | 0 | 0 | 1 | 1 | 1 | 1 | 1 | 6 |
| hist1h1c | 1 | 0 | 1 | 0 | 1 | 1 | 0 | 1 | 1 | 6 |
| vps26b   | 1 | 0 | 0 | 1 | 1 | 1 | 0 | 1 | 1 | 6 |
| ntm      | 1 | 0 | 1 | 1 | 1 | 1 | 1 | 0 | 0 | 6 |
| zfp90    | 1 | 0 | 1 | 1 | 1 | 1 | 0 | 1 | 0 | 6 |
| dlst     | 1 | 0 | 1 | 1 | 1 | 1 | 0 | 1 | 0 | 6 |
| cited2   | 1 | 0 | 1 | 1 | 1 | 0 | 1 | 1 | 0 | 6 |
| vps37a   | 1 | 0 | 0 | 0 | 1 | 1 | 1 | 1 | 1 | 6 |
| trappc1  | 1 | 0 | 0 | 1 | 1 | 0 | 1 | 1 | 1 | 6 |
| nek1     | 1 | 0 | 1 | 0 | 1 | 1 | 0 | 1 | 1 | 6 |
| ift43    | 1 | 0 | 0 | 1 | 1 | 1 | 1 | 1 | 0 | 6 |
| pank2    | 1 | 0 | 0 | 0 | 1 | 1 | 1 | 1 | 1 | 6 |
| lars2    | 1 | 0 | 0 | 0 | 1 | 1 | 1 | 1 | 1 | 6 |

|         |   |   |   |   |   |   |   |   |   |   |
|---------|---|---|---|---|---|---|---|---|---|---|
| etaa1   | 1 | 0 | 0 | 0 | 1 | 1 | 1 | 1 | 1 | 6 |
| noa1    | 1 | 0 | 1 | 0 | 1 | 1 | 1 | 1 | 0 | 6 |
| tmx4    | 1 | 0 | 1 | 0 | 1 | 1 | 0 | 1 | 1 | 6 |
| wls     | 1 | 0 | 1 | 1 | 1 | 1 | 0 | 0 | 1 | 6 |
| pfas    | 1 | 0 | 0 | 1 | 1 | 1 | 1 | 0 | 1 | 6 |
| ppp2r1b | 1 | 0 | 1 | 1 | 1 | 1 | 0 | 0 | 1 | 6 |
| nek6    | 1 | 0 | 0 | 1 | 1 | 1 | 1 | 0 | 1 | 6 |
| parm1   | 1 | 0 | 1 | 0 | 1 | 1 | 1 | 0 | 1 | 6 |
| h2afz   | 1 | 0 | 0 | 1 | 1 | 1 | 0 | 1 | 1 | 6 |
| mrps7   | 1 | 0 | 1 | 1 | 1 | 0 | 0 | 1 | 1 | 6 |
| tgfb1   | 1 | 0 | 1 | 1 | 1 | 1 | 0 | 0 | 1 | 6 |
| apbb2   | 1 | 0 | 0 | 1 | 1 | 1 | 1 | 1 | 0 | 6 |
| dtna    | 1 | 0 | 1 | 1 | 1 | 0 | 0 | 1 | 1 | 6 |
| dhrrs1  | 1 | 0 | 1 | 0 | 1 | 1 | 0 | 1 | 1 | 6 |
| armac7  | 1 | 0 | 0 | 1 | 1 | 1 | 0 | 1 | 1 | 6 |
| ptpa    | 1 | 0 | 1 | 1 | 1 | 1 | 0 | 1 | 0 | 6 |
| mastl   | 1 | 0 | 0 | 1 | 1 | 1 | 1 | 1 | 0 | 6 |
| asns    | 1 | 0 | 0 | 0 | 1 | 1 | 1 | 1 | 1 | 6 |
| slc30a3 | 1 | 0 | 1 | 1 | 1 | 0 | 0 | 1 | 1 | 6 |
| sspn    | 1 | 0 | 1 | 0 | 1 | 1 | 0 | 1 | 1 | 6 |
| prc1    | 1 | 0 | 0 | 1 | 1 | 1 | 0 | 1 | 1 | 6 |
| ptpn12  | 1 | 0 | 0 | 1 | 1 | 1 | 1 | 1 | 0 | 6 |
| pkd2    | 1 | 0 | 1 | 1 | 1 | 1 | 0 | 0 | 1 | 6 |
| pcm1    | 1 | 0 | 0 | 1 | 1 | 1 | 0 | 1 | 1 | 6 |
| cadm1   | 1 | 1 | 1 | 1 | 0 | 0 | 0 | 1 | 1 | 6 |
| prepl   | 1 | 0 | 0 | 0 | 1 | 1 | 1 | 1 | 1 | 6 |
| pitpna  | 1 | 0 | 1 | 0 | 1 | 0 | 1 | 1 | 1 | 6 |
| dctd    | 1 | 0 | 0 | 1 | 1 | 1 | 0 | 1 | 1 | 6 |
| gtse1   | 1 | 0 | 1 | 1 | 1 | 1 | 0 | 0 | 1 | 6 |
| naglu   | 1 | 0 | 0 | 1 | 1 | 0 | 1 | 1 | 1 | 6 |
| ang     | 1 | 0 | 1 | 1 | 1 | 1 | 0 | 0 | 1 | 6 |
| csnk1d  | 1 | 0 | 1 | 1 | 1 | 1 | 0 | 1 | 0 | 6 |
| ubac1   | 1 | 0 | 1 | 1 | 1 | 1 | 0 | 1 | 0 | 6 |
| nxn     | 1 | 0 | 1 | 1 | 1 | 1 | 0 | 1 | 0 | 6 |
| alkbh5  | 1 | 0 | 0 | 1 | 1 | 0 | 1 | 1 | 1 | 6 |
| cnot11  | 1 | 0 | 0 | 1 | 1 | 0 | 1 | 1 | 1 | 6 |
| lmo4    | 1 | 0 | 1 | 1 | 1 | 1 | 0 | 0 | 1 | 6 |
| dixdc1  | 1 | 0 | 1 | 0 | 1 | 1 | 1 | 0 | 1 | 6 |
| dennd1a | 1 | 0 | 1 | 1 | 1 | 1 | 0 | 0 | 1 | 6 |
| upf3a   | 1 | 0 | 0 | 1 | 1 | 0 | 1 | 1 | 1 | 6 |
| napg    | 1 | 0 | 1 | 1 | 1 | 1 | 0 | 1 | 0 | 6 |
| vps18   | 1 | 0 | 1 | 1 | 1 | 1 | 0 | 0 | 1 | 6 |
| mmp2    | 1 | 0 | 1 | 0 | 1 | 1 | 0 | 1 | 1 | 6 |
| agpat2  | 1 | 0 | 1 | 1 | 0 | 1 | 0 | 1 | 1 | 6 |
| slc7a1  | 1 | 0 | 0 | 0 | 1 | 1 | 1 | 1 | 1 | 6 |

|          |   |   |   |   |   |   |   |   |   |   |
|----------|---|---|---|---|---|---|---|---|---|---|
| f2r      | 1 | 0 | 1 | 1 | 1 | 1 | 0 | 1 | 0 | 6 |
| camkmt   | 1 | 0 | 0 | 0 | 1 | 1 | 1 | 1 | 1 | 6 |
| anapc11  | 1 | 0 | 0 | 1 | 1 | 1 | 0 | 1 | 1 | 6 |
| hsdl2    | 1 | 0 | 0 | 1 | 1 | 1 | 1 | 1 | 0 | 6 |
| asrgl1   | 1 | 0 | 1 | 0 | 1 | 1 | 0 | 1 | 1 | 6 |
| phc1     | 1 | 0 | 1 | 1 | 1 | 1 | 0 | 1 | 0 | 6 |
| kif1b    | 1 | 0 | 1 | 0 | 1 | 1 | 0 | 1 | 1 | 6 |
| bhlhe40  | 1 | 0 | 1 | 0 | 1 | 1 | 0 | 1 | 1 | 6 |
| emc9     | 1 | 0 | 1 | 0 | 1 | 1 | 1 | 0 | 1 | 6 |
| sun1     | 1 | 0 | 0 | 1 | 1 | 1 | 0 | 1 | 1 | 6 |
| nr2c1    | 1 | 0 | 1 | 0 | 1 | 1 | 0 | 1 | 1 | 6 |
| kazn     | 1 | 0 | 1 | 1 | 1 | 0 | 1 | 1 | 0 | 6 |
| g3bp1    | 1 | 0 | 1 | 1 | 1 | 0 | 1 | 0 | 1 | 6 |
| dido1    | 1 | 0 | 1 | 0 | 1 | 1 | 0 | 1 | 1 | 6 |
| spcs3    | 1 | 0 | 0 | 1 | 1 | 1 | 0 | 1 | 1 | 6 |
| nup37    | 1 | 0 | 0 | 1 | 1 | 1 | 1 | 1 | 0 | 6 |
| gspt2    | 1 | 0 | 1 | 1 | 1 | 0 | 1 | 1 | 0 | 6 |
| ralbp1   | 1 | 0 | 1 | 1 | 1 | 0 | 0 | 1 | 1 | 6 |
| ctnnbip1 | 1 | 0 | 1 | 1 | 1 | 1 | 0 | 1 | 0 | 6 |
| casp6    | 1 | 0 | 1 | 1 | 1 | 0 | 1 | 1 | 0 | 6 |
| antxr1   | 1 | 1 | 0 | 1 | 1 | 0 | 1 | 0 | 1 | 6 |
| mrpl48   | 1 | 0 | 0 | 1 | 1 | 1 | 1 | 1 | 0 | 6 |
| fosl2    | 1 | 0 | 1 | 0 | 1 | 1 | 1 | 1 | 0 | 6 |
| nectin2  | 1 | 0 | 1 | 0 | 1 | 1 | 0 | 1 | 1 | 6 |
| depdc1b  | 1 | 0 | 0 | 1 | 1 | 1 | 0 | 1 | 1 | 6 |
| hipk2    | 1 | 0 | 1 | 1 | 1 | 1 | 0 | 1 | 0 | 6 |
| dstn     | 1 | 0 | 1 | 0 | 1 | 1 | 1 | 1 | 0 | 6 |
| fos      | 1 | 0 | 1 | 1 | 1 | 0 | 0 | 1 | 1 | 6 |
| inpp5e   | 1 | 0 | 1 | 1 | 1 | 1 | 0 | 1 | 0 | 6 |
| fastkd2  | 1 | 0 | 0 | 0 | 1 | 1 | 1 | 1 | 1 | 6 |
| atp5o    | 1 | 0 | 0 | 0 | 1 | 1 | 1 | 1 | 1 | 6 |
| smco4    | 1 | 0 | 1 | 1 | 1 | 1 | 0 | 1 | 0 | 6 |
| nin      | 1 | 0 | 1 | 1 | 1 | 0 | 0 | 1 | 1 | 6 |
| arhgef40 | 1 | 0 | 0 | 1 | 1 | 1 | 1 | 0 | 1 | 6 |
| mpnd     | 1 | 0 | 1 | 0 | 1 | 1 | 1 | 1 | 0 | 6 |
| dnajb6   | 1 | 0 | 1 | 0 | 1 | 1 | 0 | 1 | 1 | 6 |
| elp4     | 1 | 0 | 0 | 0 | 1 | 1 | 1 | 1 | 1 | 6 |
| bnip2    | 1 | 0 | 0 | 1 | 1 | 1 | 0 | 1 | 1 | 6 |
| sugp2    | 1 | 0 | 0 | 1 | 1 | 1 | 0 | 1 | 1 | 6 |
| cltb     | 1 | 0 | 1 | 1 | 1 | 0 | 0 | 1 | 1 | 6 |
| crif3    | 1 | 0 | 1 | 0 | 1 | 1 | 1 | 1 | 0 | 6 |
| top1mt   | 1 | 0 | 0 | 1 | 1 | 1 | 1 | 0 | 1 | 6 |
| paics    | 1 | 0 | 0 | 0 | 1 | 1 | 1 | 1 | 1 | 6 |
| cipc     | 1 | 0 | 1 | 1 | 1 | 0 | 1 | 1 | 0 | 6 |
| hadh     | 1 | 0 | 0 | 0 | 1 | 1 | 1 | 1 | 1 | 6 |

|          |   |   |   |   |   |   |   |   |   |   |
|----------|---|---|---|---|---|---|---|---|---|---|
| slx4ip   | 1 | 0 | 1 | 0 | 1 | 1 | 0 | 1 | 1 | 6 |
| arhgef39 | 1 | 0 | 1 | 1 | 0 | 1 | 0 | 1 | 1 | 6 |
| tmem62   | 1 | 0 | 1 | 1 | 1 | 0 | 1 | 1 | 0 | 6 |
| panx1    | 1 | 1 | 0 | 0 | 0 | 1 | 1 | 1 | 1 | 6 |
| pdlm7    | 1 | 0 | 1 | 1 | 1 | 1 | 0 | 0 | 1 | 6 |
| mis18a   | 1 | 0 | 0 | 1 | 1 | 1 | 0 | 1 | 1 | 6 |
| cstf3    | 1 | 0 | 1 | 1 | 1 | 1 | 0 | 1 | 0 | 6 |
| aldh7a1  | 1 | 0 | 0 | 1 | 1 | 1 | 0 | 1 | 1 | 6 |
| chchd7   | 1 | 0 | 0 | 0 | 1 | 1 | 1 | 1 | 1 | 6 |
| gmnn     | 1 | 0 | 0 | 1 | 1 | 1 | 1 | 0 | 1 | 6 |
| ppp2r2a  | 1 | 0 | 0 | 0 | 1 | 1 | 1 | 1 | 1 | 6 |
| myo1c    | 1 | 0 | 1 | 0 | 1 | 1 | 0 | 1 | 1 | 6 |
| slc7a2   | 1 | 0 | 0 | 0 | 1 | 1 | 1 | 1 | 1 | 6 |
| abcg1    | 1 | 0 | 0 | 1 | 1 | 1 | 1 | 1 | 0 | 6 |
| tor2a    | 1 | 0 | 0 | 1 | 1 | 0 | 1 | 1 | 1 | 6 |
| rbms2    | 1 | 0 | 1 | 0 | 1 | 1 | 0 | 1 | 1 | 6 |
| sec24d   | 1 | 0 | 0 | 0 | 1 | 1 | 1 | 1 | 1 | 6 |
| phpt1    | 1 | 0 | 1 | 1 | 1 | 0 | 0 | 1 | 1 | 6 |
| rock1    | 1 | 0 | 0 | 1 | 1 | 0 | 1 | 1 | 1 | 6 |
| cep131   | 1 | 0 | 1 | 0 | 1 | 1 | 0 | 1 | 1 | 6 |
| tatdn2   | 1 | 0 | 0 | 1 | 1 | 1 | 1 | 1 | 0 | 6 |
| srr      | 1 | 0 | 1 | 0 | 1 | 1 | 0 | 1 | 1 | 6 |
| ptbp1    | 1 | 0 | 0 | 1 | 1 | 1 | 0 | 1 | 1 | 6 |
| stx12    | 1 | 0 | 1 | 0 | 1 | 1 | 1 | 0 | 1 | 6 |
| vamp2    | 1 | 0 | 1 | 1 | 1 | 1 | 0 | 0 | 1 | 6 |
| abi2     | 1 | 0 | 1 | 0 | 1 | 1 | 0 | 1 | 1 | 6 |
| camsap1  | 1 | 0 | 0 | 1 | 1 | 1 | 0 | 1 | 1 | 6 |
| trim32   | 1 | 0 | 1 | 1 | 1 | 0 | 1 | 1 | 0 | 6 |
| aga      | 1 | 0 | 0 | 1 | 1 | 1 | 1 | 0 | 1 | 6 |
| exoc7    | 1 | 0 | 0 | 1 | 1 | 1 | 0 | 1 | 1 | 6 |
| rrm2     | 1 | 0 | 1 | 1 | 0 | 1 | 1 | 0 | 1 | 6 |
| rnf187   | 1 | 0 | 1 | 0 | 1 | 0 | 1 | 1 | 1 | 6 |
| myh9     | 1 | 0 | 1 | 1 | 1 | 1 | 0 | 1 | 0 | 6 |
| socs2    | 0 | 1 | 1 | 0 | 1 | 0 | 1 | 1 | 1 | 6 |
| slc2a13  | 0 | 1 | 1 | 0 | 1 | 1 | 0 | 1 | 1 | 6 |
| tnip1    | 0 | 1 | 1 | 0 | 1 | 1 | 0 | 1 | 1 | 6 |
| slc39a11 | 0 | 1 | 1 | 1 | 1 | 0 | 0 | 1 | 1 | 6 |
| tnfaip8  | 0 | 1 | 0 | 0 | 1 | 1 | 1 | 1 | 1 | 6 |
| hspb8    | 0 | 1 | 1 | 1 | 1 | 1 | 0 | 0 | 1 | 6 |
| amigo2   | 0 | 1 | 1 | 0 | 1 | 1 | 1 | 0 | 1 | 6 |
| minpp1   | 0 | 1 | 1 | 0 | 1 | 1 | 1 | 1 | 0 | 6 |
| rap2b    | 0 | 1 | 1 | 0 | 1 | 1 | 1 | 1 | 0 | 6 |
| sdcb4    | 0 | 1 | 1 | 1 | 1 | 1 | 0 | 0 | 1 | 6 |
| soat1    | 0 | 1 | 1 | 0 | 1 | 1 | 0 | 1 | 1 | 6 |
| smarcb1  | 0 | 1 | 1 | 0 | 1 | 1 | 1 | 1 | 0 | 6 |

|          |   |   |   |   |   |   |   |   |   |   |
|----------|---|---|---|---|---|---|---|---|---|---|
| atf6     | 0 | 1 | 0 | 1 | 1 | 1 | 0 | 1 | 1 | 6 |
| mcf2     | 0 | 1 | 1 | 1 | 1 | 0 | 0 | 1 | 1 | 6 |
| igf1r    | 0 | 0 | 1 | 0 | 1 | 1 | 1 | 1 | 1 | 6 |
| tns3     | 0 | 0 | 1 | 1 | 1 | 1 | 1 | 0 | 1 | 6 |
| ctdspl   | 0 | 0 | 1 | 1 | 1 | 1 | 0 | 1 | 1 | 6 |
| dlgap4   | 0 | 0 | 1 | 0 | 1 | 1 | 1 | 1 | 1 | 6 |
| furin    | 0 | 0 | 1 | 1 | 1 | 1 | 1 | 0 | 1 | 6 |
| prmt2    | 0 | 0 | 1 | 1 | 1 | 1 | 0 | 1 | 1 | 6 |
| sort1    | 0 | 0 | 1 | 1 | 1 | 1 | 0 | 1 | 1 | 6 |
| abcd3    | 0 | 0 | 1 | 1 | 1 | 1 | 1 | 1 | 0 | 6 |
| gpt2     | 0 | 0 | 1 | 0 | 1 | 1 | 1 | 1 | 1 | 6 |
| dcakd    | 0 | 0 | 1 | 1 | 1 | 1 | 1 | 1 | 0 | 6 |
| gnai2    | 0 | 0 | 1 | 1 | 1 | 0 | 1 | 1 | 1 | 6 |
| llgl1    | 0 | 0 | 1 | 1 | 0 | 1 | 1 | 1 | 1 | 6 |
| gsta4    | 0 | 0 | 1 | 0 | 1 | 1 | 1 | 1 | 1 | 6 |
| gadd45a  | 0 | 0 | 1 | 1 | 1 | 1 | 1 | 0 | 1 | 6 |
| kdm7a    | 0 | 0 | 1 | 0 | 1 | 1 | 1 | 1 | 1 | 6 |
| map1b    | 0 | 0 | 1 | 1 | 1 | 1 | 0 | 1 | 1 | 6 |
| arhgap1  | 0 | 0 | 1 | 1 | 1 | 0 | 1 | 1 | 1 | 6 |
| pgm2     | 0 | 0 | 1 | 1 | 1 | 1 | 1 | 1 | 0 | 6 |
| wnk1     | 0 | 0 | 1 | 0 | 1 | 1 | 1 | 1 | 1 | 6 |
| tcf25    | 0 | 0 | 1 | 0 | 1 | 1 | 1 | 1 | 1 | 6 |
| kif18b   | 0 | 0 | 1 | 0 | 1 | 1 | 1 | 1 | 1 | 6 |
| mcmdbp   | 0 | 0 | 1 | 1 | 1 | 1 | 1 | 1 | 0 | 6 |
| fam210b  | 0 | 0 | 1 | 1 | 1 | 1 | 0 | 1 | 1 | 6 |
| ptcd2    | 0 | 0 | 1 | 0 | 1 | 1 | 1 | 1 | 1 | 6 |
| bcat2    | 0 | 0 | 1 | 1 | 1 | 1 | 1 | 0 | 1 | 6 |
| gnb5     | 0 | 0 | 1 | 1 | 1 | 1 | 0 | 1 | 1 | 6 |
| als2     | 0 | 0 | 1 | 0 | 1 | 1 | 1 | 1 | 1 | 6 |
| vdac1    | 0 | 0 | 1 | 1 | 1 | 1 | 1 | 1 | 0 | 6 |
| gdi1     | 0 | 0 | 1 | 1 | 1 | 1 | 0 | 1 | 1 | 6 |
| mfap3    | 0 | 0 | 1 | 1 | 1 | 1 | 1 | 1 | 0 | 6 |
| snd1     | 0 | 0 | 1 | 0 | 1 | 1 | 1 | 1 | 1 | 6 |
| nrp1     | 0 | 0 | 1 | 1 | 1 | 1 | 0 | 1 | 1 | 6 |
| hp1bp3   | 0 | 0 | 1 | 1 | 1 | 1 | 1 | 0 | 1 | 6 |
| otud7b   | 0 | 0 | 1 | 0 | 1 | 1 | 1 | 1 | 1 | 6 |
| ppp2ca   | 0 | 0 | 1 | 1 | 1 | 1 | 0 | 1 | 1 | 6 |
| card10   | 0 | 0 | 1 | 1 | 1 | 1 | 0 | 1 | 1 | 6 |
| tnfrsf21 | 0 | 0 | 1 | 1 | 1 | 1 | 0 | 1 | 1 | 6 |
| atraid   | 0 | 0 | 1 | 1 | 1 | 0 | 1 | 1 | 1 | 6 |
| tnrc6a   | 0 | 0 | 1 | 1 | 1 | 1 | 0 | 1 | 1 | 6 |
| pign     | 0 | 0 | 1 | 1 | 1 | 1 | 1 | 1 | 0 | 6 |
| tdrd3    | 0 | 0 | 1 | 0 | 1 | 1 | 1 | 1 | 1 | 6 |
| sar1a    | 0 | 0 | 1 | 1 | 1 | 1 | 0 | 1 | 1 | 6 |
| sh3glb2  | 0 | 0 | 1 | 0 | 1 | 1 | 1 | 1 | 1 | 6 |



|         |   |   |   |   |   |   |   |   |   |   |
|---------|---|---|---|---|---|---|---|---|---|---|
| cdk5    | 0 | 0 | 1 | 0 | 1 | 1 | 1 | 1 | 1 | 6 |
| yip6    | 0 | 0 | 1 | 0 | 1 | 1 | 1 | 1 | 1 | 6 |
| sap30l  | 0 | 0 | 1 | 1 | 1 | 1 | 1 | 0 | 1 | 6 |
| fchsd2  | 0 | 0 | 1 | 1 | 1 | 0 | 1 | 1 | 1 | 6 |
| vcl     | 0 | 0 | 1 | 1 | 1 | 1 | 0 | 1 | 1 | 6 |
| mdm4    | 0 | 0 | 1 | 0 | 1 | 1 | 1 | 1 | 1 | 6 |
| ext1    | 0 | 0 | 1 | 1 | 1 | 1 | 1 | 1 | 0 | 6 |
| glo1    | 0 | 0 | 1 | 1 | 1 | 1 | 1 | 1 | 0 | 6 |
| aldh4a1 | 0 | 0 | 1 | 1 | 1 | 1 | 1 | 0 | 1 | 6 |
| efl1    | 0 | 0 | 1 | 1 | 1 | 1 | 0 | 1 | 1 | 6 |
| mapk1   | 0 | 0 | 1 | 1 | 1 | 1 | 0 | 1 | 1 | 6 |
| mb21d2  | 0 | 0 | 1 | 1 | 1 | 1 | 1 | 1 | 0 | 6 |
| pgpep1  | 0 | 0 | 1 | 1 | 1 | 1 | 0 | 1 | 1 | 6 |
| hps4    | 0 | 0 | 1 | 0 | 1 | 1 | 1 | 1 | 1 | 6 |
| ubap1   | 0 | 0 | 1 | 1 | 1 | 1 | 1 | 1 | 0 | 6 |
| cnot4   | 0 | 0 | 1 | 0 | 1 | 1 | 1 | 1 | 1 | 6 |
| urod    | 0 | 0 | 1 | 0 | 1 | 1 | 1 | 1 | 1 | 6 |
| ccnt2   | 0 | 0 | 1 | 1 | 1 | 1 | 0 | 1 | 1 | 6 |
| mtus1   | 0 | 0 | 1 | 1 | 1 | 1 | 0 | 1 | 1 | 6 |
| katnal1 | 0 | 0 | 1 | 1 | 1 | 1 | 0 | 1 | 1 | 6 |
| plat    | 0 | 0 | 1 | 1 | 1 | 1 | 1 | 1 | 0 | 6 |
| pex1    | 0 | 0 | 1 | 1 | 1 | 1 | 1 | 1 | 0 | 6 |
| ocr1    | 0 | 0 | 1 | 1 | 1 | 0 | 1 | 1 | 1 | 6 |
| evi5    | 0 | 0 | 1 | 0 | 1 | 1 | 1 | 1 | 1 | 6 |
| adk     | 0 | 0 | 1 | 1 | 1 | 1 | 0 | 1 | 1 | 6 |
| kdsr    | 0 | 0 | 1 | 1 | 1 | 1 | 0 | 1 | 1 | 6 |
| cenpn   | 0 | 0 | 1 | 1 | 1 | 1 | 0 | 1 | 1 | 6 |
| cryz    | 0 | 0 | 1 | 1 | 1 | 1 | 1 | 1 | 0 | 6 |
| ostm1   | 0 | 0 | 1 | 1 | 1 | 1 | 0 | 1 | 1 | 6 |
| atg101  | 0 | 0 | 1 | 0 | 1 | 1 | 1 | 1 | 1 | 6 |
| smurf1  | 0 | 0 | 1 | 0 | 1 | 1 | 1 | 1 | 1 | 6 |
| endod1  | 0 | 0 | 1 | 1 | 1 | 0 | 1 | 1 | 1 | 6 |
| kmt5a   | 0 | 0 | 1 | 1 | 1 | 0 | 1 | 1 | 1 | 6 |
| oxct1   | 0 | 0 | 1 | 1 | 1 | 0 | 1 | 1 | 1 | 6 |
| mmd     | 0 | 0 | 1 | 1 | 1 | 1 | 0 | 1 | 1 | 6 |
| bckdhb  | 0 | 0 | 1 | 1 | 1 | 1 | 1 | 0 | 1 | 6 |
| foxn3   | 0 | 0 | 1 | 0 | 1 | 1 | 1 | 1 | 1 | 6 |
| rc1     | 0 | 0 | 1 | 1 | 1 | 1 | 0 | 1 | 1 | 6 |
| rdm1    | 0 | 0 | 1 | 0 | 1 | 1 | 1 | 1 | 1 | 6 |
| cyb5b   | 0 | 0 | 1 | 1 | 1 | 1 | 0 | 1 | 1 | 6 |
| eci1    | 0 | 0 | 1 | 0 | 1 | 1 | 1 | 1 | 1 | 6 |
| tmed10  | 0 | 0 | 1 | 1 | 1 | 1 | 0 | 1 | 1 | 6 |
| lpp     | 0 | 0 | 1 | 1 | 1 | 1 | 1 | 1 | 0 | 6 |
| sept6   | 0 | 0 | 1 | 1 | 1 | 1 | 1 | 0 | 1 | 6 |
| tsc22d3 | 0 | 0 | 1 | 1 | 1 | 1 | 1 | 0 | 1 | 6 |

|          |   |   |   |   |   |   |   |   |   |   |
|----------|---|---|---|---|---|---|---|---|---|---|
| foxm1    | 0 | 0 | 1 | 0 | 1 | 1 | 1 | 1 | 1 | 6 |
| rassf1   | 0 | 0 | 1 | 1 | 1 | 1 | 0 | 1 | 1 | 6 |
| bbs4     | 0 | 0 | 1 | 1 | 1 | 1 | 0 | 1 | 1 | 6 |
| cenpk    | 0 | 0 | 1 | 0 | 1 | 1 | 1 | 1 | 1 | 6 |
| smad2    | 0 | 0 | 1 | 0 | 1 | 1 | 1 | 1 | 1 | 6 |
| nipbl    | 0 | 0 | 1 | 1 | 1 | 1 | 0 | 1 | 1 | 6 |
| tmem214  | 0 | 0 | 1 | 1 | 1 | 0 | 1 | 1 | 1 | 6 |
| bcap29   | 0 | 0 | 1 | 1 | 1 | 1 | 0 | 1 | 1 | 6 |
| tada2a   | 0 | 0 | 1 | 0 | 1 | 1 | 1 | 1 | 1 | 6 |
| tuft1    | 0 | 0 | 1 | 1 | 1 | 0 | 1 | 1 | 1 | 6 |
| hnrnpdl  | 0 | 0 | 1 | 1 | 1 | 1 | 0 | 1 | 1 | 6 |
| mrs2     | 0 | 0 | 1 | 1 | 1 | 1 | 0 | 1 | 1 | 6 |
| noc2l    | 0 | 0 | 1 | 1 | 1 | 1 | 0 | 1 | 1 | 6 |
| gaa      | 0 | 0 | 1 | 1 | 1 | 0 | 1 | 1 | 1 | 6 |
| hibadh   | 0 | 0 | 1 | 1 | 1 | 1 | 1 | 1 | 0 | 6 |
| rbm8a    | 0 | 0 | 1 | 0 | 1 | 1 | 1 | 1 | 1 | 6 |
| nsmaf    | 0 | 0 | 1 | 0 | 1 | 1 | 1 | 1 | 1 | 6 |
| scmh1    | 0 | 0 | 1 | 0 | 1 | 1 | 1 | 1 | 1 | 6 |
| ccdc18   | 0 | 0 | 1 | 0 | 1 | 1 | 1 | 1 | 1 | 6 |
| cst3     | 0 | 0 | 1 | 1 | 1 | 1 | 0 | 1 | 1 | 6 |
| zwint    | 0 | 0 | 1 | 0 | 1 | 1 | 1 | 1 | 1 | 6 |
| fibp     | 0 | 0 | 1 | 1 | 1 | 1 | 1 | 0 | 1 | 6 |
| fer      | 0 | 0 | 1 | 1 | 1 | 1 | 1 | 1 | 0 | 6 |
| aurka    | 0 | 0 | 1 | 1 | 1 | 1 | 0 | 1 | 1 | 6 |
| dhodh    | 0 | 0 | 1 | 0 | 1 | 1 | 1 | 1 | 1 | 6 |
| tmed9    | 0 | 0 | 1 | 1 | 1 | 1 | 1 | 0 | 1 | 6 |
| mta3     | 0 | 0 | 1 | 1 | 1 | 1 | 1 | 1 | 0 | 6 |
| ccng1    | 0 | 0 | 1 | 1 | 1 | 1 | 1 | 1 | 0 | 6 |
| rrm1     | 0 | 0 | 1 | 1 | 1 | 1 | 1 | 0 | 1 | 6 |
| ppp3r1   | 0 | 0 | 1 | 1 | 1 | 1 | 1 | 0 | 1 | 6 |
| dnmt3b   | 0 | 0 | 1 | 1 | 1 | 1 | 0 | 1 | 1 | 6 |
| srrd     | 0 | 0 | 1 | 0 | 1 | 1 | 1 | 1 | 1 | 6 |
| mxra8    | 0 | 0 | 1 | 1 | 1 | 0 | 1 | 1 | 1 | 6 |
| prim2    | 0 | 0 | 1 | 1 | 1 | 1 | 1 | 1 | 0 | 6 |
| rrp1b    | 0 | 0 | 1 | 1 | 1 | 0 | 1 | 1 | 1 | 6 |
| aaas     | 0 | 0 | 1 | 0 | 1 | 1 | 1 | 1 | 1 | 6 |
| tshz1    | 0 | 0 | 1 | 0 | 1 | 1 | 1 | 1 | 1 | 6 |
| l2hgdh   | 0 | 0 | 1 | 1 | 1 | 1 | 1 | 0 | 1 | 6 |
| pcca     | 0 | 0 | 1 | 1 | 1 | 1 | 1 | 1 | 0 | 6 |
| ide      | 0 | 0 | 1 | 0 | 1 | 1 | 1 | 1 | 1 | 6 |
| lig3     | 0 | 0 | 1 | 0 | 1 | 1 | 1 | 1 | 1 | 6 |
| fyn      | 0 | 0 | 1 | 0 | 1 | 1 | 1 | 1 | 1 | 6 |
| nfatc2ip | 0 | 0 | 1 | 1 | 1 | 1 | 0 | 1 | 1 | 6 |
| rbfa     | 0 | 0 | 1 | 0 | 1 | 1 | 1 | 1 | 1 | 6 |
| dbt      | 0 | 0 | 1 | 1 | 1 | 1 | 1 | 0 | 1 | 6 |

|          |   |   |   |   |   |   |   |   |   |   |
|----------|---|---|---|---|---|---|---|---|---|---|
| ndst1    | 0 | 0 | 1 | 1 | 1 | 1 | 0 | 1 | 1 | 6 |
| rnf32    | 0 | 0 | 1 | 0 | 1 | 1 | 1 | 1 | 1 | 6 |
| hddc2    | 0 | 0 | 1 | 1 | 1 | 1 | 0 | 1 | 1 | 6 |
| cdc16    | 0 | 0 | 1 | 1 | 1 | 0 | 1 | 1 | 1 | 6 |
| psen1    | 0 | 0 | 1 | 0 | 1 | 1 | 1 | 1 | 1 | 6 |
| hacd3    | 0 | 0 | 1 | 1 | 1 | 1 | 0 | 1 | 1 | 6 |
| kat5     | 0 | 0 | 1 | 0 | 1 | 1 | 1 | 1 | 1 | 6 |
| acbd3    | 0 | 0 | 1 | 1 | 1 | 0 | 1 | 1 | 1 | 6 |
| igf2bp3  | 0 | 0 | 1 | 1 | 1 | 1 | 0 | 1 | 1 | 6 |
| esyt2    | 0 | 0 | 1 | 1 | 1 | 1 | 0 | 1 | 1 | 6 |
| vps13a   | 0 | 0 | 1 | 1 | 1 | 1 | 0 | 1 | 1 | 6 |
| kcmf1    | 0 | 0 | 1 | 0 | 1 | 1 | 1 | 1 | 1 | 6 |
| srxn1    | 0 | 0 | 1 | 1 | 1 | 1 | 1 | 0 | 1 | 6 |
| sar1b    | 0 | 0 | 1 | 0 | 1 | 1 | 1 | 1 | 1 | 6 |
| ndrg3    | 0 | 0 | 1 | 1 | 1 | 1 | 0 | 1 | 1 | 6 |
| rbbp9    | 0 | 0 | 1 | 1 | 1 | 1 | 1 | 0 | 1 | 6 |
| wdr37    | 0 | 0 | 1 | 1 | 1 | 1 | 0 | 1 | 1 | 6 |
| mrpl23   | 0 | 0 | 1 | 1 | 1 | 1 | 0 | 1 | 1 | 6 |
| myh10    | 0 | 0 | 1 | 0 | 1 | 1 | 1 | 1 | 1 | 6 |
| usp36    | 0 | 0 | 1 | 0 | 1 | 1 | 1 | 1 | 1 | 6 |
| isca1    | 0 | 0 | 1 | 1 | 1 | 1 | 1 | 1 | 0 | 6 |
| sertad2  | 0 | 0 | 1 | 1 | 1 | 1 | 0 | 1 | 1 | 6 |
| nfe2l1   | 0 | 0 | 1 | 0 | 1 | 1 | 1 | 1 | 1 | 6 |
| mcm7     | 0 | 0 | 1 | 0 | 1 | 1 | 1 | 1 | 1 | 6 |
| ckap2l   | 0 | 0 | 1 | 1 | 1 | 1 | 0 | 1 | 1 | 6 |
| mphosph9 | 0 | 0 | 1 | 0 | 1 | 1 | 1 | 1 | 1 | 6 |
| bcl2l13  | 0 | 0 | 1 | 1 | 1 | 0 | 1 | 1 | 1 | 6 |
| tmed3    | 0 | 0 | 1 | 0 | 1 | 1 | 1 | 1 | 1 | 6 |
| klc1     | 0 | 0 | 1 | 1 | 1 | 1 | 0 | 1 | 1 | 6 |
| rabgap1l | 0 | 0 | 1 | 0 | 1 | 1 | 1 | 1 | 1 | 6 |
| tbc1d2   | 0 | 0 | 1 | 1 | 1 | 1 | 1 | 0 | 1 | 6 |
| ate1     | 0 | 0 | 1 | 1 | 1 | 1 | 1 | 1 | 0 | 6 |
| fitm2    | 0 | 0 | 1 | 1 | 1 | 0 | 1 | 1 | 1 | 6 |
| akirin1  | 0 | 0 | 1 | 1 | 1 | 1 | 0 | 1 | 1 | 6 |
| ccnd1    | 0 | 0 | 1 | 1 | 1 | 1 | 0 | 1 | 1 | 6 |
| cyth2    | 0 | 0 | 1 | 0 | 1 | 1 | 1 | 1 | 1 | 6 |
| pdpr     | 0 | 0 | 1 | 1 | 1 | 1 | 1 | 1 | 0 | 6 |
| rala     | 0 | 0 | 1 | 0 | 1 | 1 | 1 | 1 | 1 | 6 |
| zc3h10   | 0 | 0 | 1 | 1 | 1 | 0 | 1 | 1 | 1 | 6 |
| oma1     | 0 | 0 | 1 | 0 | 1 | 1 | 1 | 1 | 1 | 6 |
| hmgcr    | 0 | 0 | 1 | 1 | 1 | 1 | 1 | 1 | 0 | 6 |
| tsen2    | 0 | 0 | 1 | 1 | 1 | 0 | 1 | 1 | 1 | 6 |
| ptbp2    | 0 | 0 | 1 | 1 | 1 | 1 | 1 | 0 | 1 | 6 |
| hsbp1    | 0 | 0 | 1 | 1 | 1 | 1 | 1 | 1 | 0 | 6 |
| slc10a7  | 0 | 0 | 1 | 1 | 1 | 1 | 0 | 1 | 1 | 6 |

|         |   |   |   |   |   |   |   |   |   |   |
|---------|---|---|---|---|---|---|---|---|---|---|
| rad51c  | 0 | 0 | 1 | 1 | 1 | 1 | 0 | 1 | 1 | 6 |
| slc44a1 | 0 | 0 | 1 | 1 | 1 | 1 | 0 | 1 | 1 | 6 |
| jade2   | 0 | 0 | 1 | 1 | 1 | 1 | 0 | 1 | 1 | 6 |
| lancl1  | 0 | 0 | 1 | 1 | 1 | 1 | 1 | 1 | 0 | 6 |
| atl3    | 0 | 0 | 1 | 0 | 1 | 1 | 1 | 1 | 1 | 6 |
| chrna5  | 0 | 0 | 1 | 1 | 1 | 1 | 1 | 0 | 1 | 6 |
| ncaph2  | 0 | 0 | 1 | 0 | 1 | 1 | 1 | 1 | 1 | 6 |
| tle1    | 0 | 0 | 1 | 1 | 1 | 1 | 0 | 1 | 1 | 6 |
| ift22   | 0 | 0 | 1 | 0 | 1 | 1 | 1 | 1 | 1 | 6 |
| ppm1l   | 0 | 0 | 1 | 0 | 1 | 1 | 1 | 1 | 1 | 6 |
| tnfaip1 | 0 | 0 | 1 | 1 | 1 | 1 | 0 | 1 | 1 | 6 |
| blm     | 0 | 0 | 1 | 0 | 1 | 1 | 1 | 1 | 1 | 6 |
| ldha    | 0 | 0 | 1 | 0 | 1 | 1 | 1 | 1 | 1 | 6 |
| troap   | 0 | 0 | 1 | 0 | 1 | 1 | 1 | 1 | 1 | 6 |
| gdpd1   | 0 | 0 | 1 | 0 | 1 | 1 | 1 | 1 | 1 | 6 |
| ntpcr   | 0 | 0 | 1 | 1 | 1 | 1 | 0 | 1 | 1 | 6 |
| pole    | 0 | 0 | 1 | 0 | 1 | 1 | 1 | 1 | 1 | 6 |
| yme1l1  | 0 | 0 | 1 | 1 | 1 | 0 | 1 | 1 | 1 | 6 |
| fbxo28  | 0 | 0 | 1 | 0 | 1 | 1 | 1 | 1 | 1 | 6 |
| idnk    | 0 | 0 | 1 | 0 | 1 | 1 | 1 | 1 | 1 | 6 |
| ttl4    | 0 | 0 | 1 | 1 | 1 | 1 | 1 | 1 | 0 | 6 |
| cdv3    | 0 | 0 | 1 | 1 | 1 | 1 | 0 | 1 | 1 | 6 |
| kctd1   | 0 | 0 | 1 | 0 | 1 | 1 | 1 | 1 | 1 | 6 |
| mcl1    | 0 | 0 | 1 | 0 | 1 | 1 | 1 | 1 | 1 | 6 |
| fnip1   | 0 | 0 | 1 | 1 | 1 | 1 | 0 | 1 | 1 | 6 |
| lyplal1 | 0 | 0 | 1 | 0 | 1 | 1 | 1 | 1 | 1 | 6 |
| ddx11   | 0 | 0 | 1 | 1 | 1 | 1 | 0 | 1 | 1 | 6 |
| ppp2r5d | 0 | 0 | 1 | 1 | 1 | 1 | 1 | 1 | 0 | 6 |
| tm7sf3  | 0 | 0 | 1 | 1 | 1 | 1 | 1 | 0 | 1 | 6 |
| srsf10  | 0 | 0 | 1 | 0 | 1 | 1 | 1 | 1 | 1 | 6 |
| diexf   | 0 | 0 | 1 | 0 | 1 | 1 | 1 | 1 | 1 | 6 |
| ylpm1   | 0 | 0 | 1 | 0 | 1 | 1 | 1 | 1 | 1 | 6 |
| pold1   | 0 | 0 | 1 | 0 | 1 | 1 | 1 | 1 | 1 | 6 |
| lpin1   | 0 | 0 | 1 | 1 | 1 | 1 | 0 | 1 | 1 | 6 |
| smarcc2 | 0 | 0 | 1 | 0 | 1 | 1 | 1 | 1 | 1 | 6 |
| naa25   | 0 | 0 | 1 | 0 | 1 | 1 | 1 | 1 | 1 | 6 |
| oxnad1  | 0 | 0 | 1 | 1 | 1 | 0 | 1 | 1 | 1 | 6 |
| usp42   | 0 | 0 | 1 | 1 | 1 | 1 | 0 | 1 | 1 | 6 |
| arrb2   | 0 | 0 | 1 | 0 | 1 | 1 | 1 | 1 | 1 | 6 |
| thg1l   | 0 | 0 | 1 | 0 | 1 | 1 | 1 | 1 | 1 | 6 |
| cenpm   | 0 | 0 | 1 | 0 | 1 | 1 | 1 | 1 | 1 | 6 |
| srsf6   | 0 | 0 | 1 | 1 | 1 | 0 | 1 | 1 | 1 | 6 |
| cdca5   | 0 | 0 | 1 | 1 | 1 | 1 | 1 | 0 | 1 | 6 |
| uchl5   | 0 | 0 | 1 | 0 | 1 | 1 | 1 | 1 | 1 | 6 |
| susd6   | 0 | 0 | 1 | 1 | 1 | 1 | 1 | 0 | 1 | 6 |

|          |   |   |   |   |   |   |   |   |   |   |
|----------|---|---|---|---|---|---|---|---|---|---|
| melk     | 0 | 0 | 1 | 1 | 0 | 1 | 1 | 1 | 1 | 6 |
| crebrf   | 0 | 0 | 1 | 1 | 1 | 0 | 1 | 1 | 1 | 6 |
| hagh     | 0 | 0 | 1 | 1 | 1 | 0 | 1 | 1 | 1 | 6 |
| nectin3  | 0 | 0 | 1 | 1 | 1 | 1 | 0 | 1 | 1 | 6 |
| mcm4     | 0 | 0 | 1 | 1 | 1 | 1 | 1 | 0 | 1 | 6 |
| rbm33    | 0 | 0 | 1 | 0 | 1 | 1 | 1 | 1 | 1 | 6 |
| zfand2a  | 0 | 0 | 1 | 1 | 1 | 1 | 1 | 1 | 0 | 6 |
| cebpb    | 0 | 0 | 1 | 1 | 1 | 0 | 1 | 1 | 1 | 6 |
| ift27    | 0 | 0 | 1 | 0 | 1 | 1 | 1 | 1 | 1 | 6 |
| e2f2     | 0 | 0 | 1 | 1 | 1 | 1 | 0 | 1 | 1 | 6 |
| dzip3    | 0 | 0 | 1 | 0 | 1 | 1 | 1 | 1 | 1 | 6 |
| ubqln1   | 0 | 0 | 1 | 1 | 1 | 1 | 0 | 1 | 1 | 6 |
| acs1     | 0 | 0 | 1 | 0 | 1 | 1 | 1 | 1 | 1 | 6 |
| sdhc     | 0 | 0 | 1 | 1 | 1 | 1 | 1 | 1 | 0 | 6 |
| leprotl1 | 0 | 0 | 1 | 1 | 1 | 1 | 0 | 1 | 1 | 6 |
| hipk3    | 0 | 0 | 1 | 1 | 1 | 1 | 1 | 0 | 1 | 6 |
| cdpf1    | 0 | 0 | 1 | 0 | 1 | 1 | 1 | 1 | 1 | 6 |
| lgalsl   | 0 | 0 | 1 | 0 | 1 | 1 | 1 | 1 | 1 | 6 |
| cenpw    | 0 | 0 | 1 | 0 | 1 | 1 | 1 | 1 | 1 | 6 |
| icmt     | 0 | 0 | 1 | 1 | 1 | 1 | 0 | 1 | 1 | 6 |
| psmc3ip  | 0 | 0 | 1 | 1 | 1 | 1 | 0 | 1 | 1 | 6 |
| hnrnpul1 | 0 | 0 | 1 | 1 | 1 | 1 | 0 | 1 | 1 | 6 |
| ilf3     | 0 | 0 | 1 | 0 | 1 | 1 | 1 | 1 | 1 | 6 |
| cdc25c   | 0 | 0 | 1 | 1 | 1 | 1 | 0 | 1 | 1 | 6 |
| thnsl1   | 0 | 0 | 1 | 1 | 1 | 1 | 1 | 0 | 1 | 6 |
| sec22c   | 0 | 0 | 1 | 1 | 0 | 1 | 1 | 1 | 1 | 6 |
| acyp1    | 0 | 0 | 1 | 1 | 1 | 1 | 0 | 1 | 1 | 6 |
| dpp7     | 0 | 0 | 1 | 1 | 1 | 1 | 0 | 1 | 1 | 6 |
| reep5    | 0 | 0 | 1 | 1 | 1 | 1 | 0 | 1 | 1 | 6 |
| bcdin3d  | 0 | 0 | 1 | 1 | 1 | 1 | 1 | 0 | 1 | 6 |
| rida     | 0 | 0 | 1 | 1 | 1 | 1 | 1 | 1 | 0 | 6 |
| blmh     | 0 | 0 | 1 | 0 | 1 | 1 | 1 | 1 | 1 | 6 |
| brca1    | 0 | 0 | 1 | 0 | 1 | 1 | 1 | 1 | 1 | 6 |
| bax      | 0 | 0 | 1 | 1 | 1 | 1 | 0 | 1 | 1 | 6 |
| itgb1bp1 | 0 | 0 | 1 | 1 | 1 | 1 | 1 | 0 | 1 | 6 |
| idh1     | 0 | 0 | 1 | 1 | 1 | 1 | 1 | 0 | 1 | 6 |
| eif1ad   | 0 | 0 | 1 | 0 | 1 | 1 | 1 | 1 | 1 | 6 |
| cul4b    | 0 | 0 | 1 | 1 | 1 | 1 | 1 | 0 | 1 | 6 |
| asxl1    | 0 | 0 | 1 | 1 | 1 | 1 | 0 | 1 | 1 | 6 |
| cdc37l1  | 0 | 0 | 1 | 0 | 1 | 1 | 1 | 1 | 1 | 6 |
| spop     | 0 | 0 | 1 | 0 | 1 | 1 | 1 | 1 | 1 | 6 |
| whsc1    | 0 | 0 | 1 | 0 | 1 | 1 | 1 | 1 | 1 | 6 |
| cetn3    | 0 | 0 | 1 | 0 | 1 | 1 | 1 | 1 | 1 | 6 |
| b4gat1   | 0 | 0 | 1 | 1 | 1 | 1 | 0 | 1 | 1 | 6 |
| acbd6    | 0 | 0 | 1 | 1 | 1 | 1 | 0 | 1 | 1 | 6 |

|          |   |   |   |   |   |   |   |   |   |   |
|----------|---|---|---|---|---|---|---|---|---|---|
| eefsec   | 0 | 0 | 1 | 0 | 1 | 1 | 1 | 1 | 1 | 6 |
| golp3l   | 0 | 0 | 1 | 1 | 1 | 1 | 1 | 1 | 0 | 6 |
| stx17    | 0 | 0 | 1 | 0 | 1 | 1 | 1 | 1 | 1 | 6 |
| mrpl28   | 0 | 0 | 1 | 1 | 1 | 1 | 0 | 1 | 1 | 6 |
| efcab14  | 0 | 0 | 1 | 0 | 1 | 1 | 1 | 1 | 1 | 6 |
| sesn3    | 0 | 0 | 1 | 1 | 1 | 1 | 0 | 1 | 1 | 6 |
| ppp1r15a | 0 | 0 | 1 | 0 | 1 | 1 | 1 | 1 | 1 | 6 |
| ergic1   | 0 | 0 | 1 | 1 | 1 | 1 | 1 | 0 | 1 | 6 |
| ndel1    | 0 | 0 | 1 | 0 | 1 | 1 | 1 | 1 | 1 | 6 |
| mast2    | 0 | 0 | 1 | 1 | 1 | 0 | 1 | 1 | 1 | 6 |
| srm      | 0 | 0 | 1 | 1 | 1 | 0 | 1 | 1 | 1 | 6 |
| thop1    | 0 | 0 | 1 | 0 | 1 | 1 | 1 | 1 | 1 | 6 |
| rfc2     | 0 | 0 | 1 | 1 | 1 | 1 | 1 | 1 | 0 | 6 |
| commd7   | 0 | 0 | 1 | 1 | 1 | 1 | 0 | 1 | 1 | 6 |
| rapgef2  | 0 | 0 | 1 | 0 | 1 | 1 | 1 | 1 | 1 | 6 |
| tubg1    | 0 | 0 | 1 | 1 | 1 | 1 | 1 | 0 | 1 | 6 |
| dennd5b  | 0 | 0 | 1 | 1 | 1 | 1 | 1 | 0 | 1 | 6 |
| lss      | 0 | 0 | 1 | 1 | 1 | 1 | 0 | 1 | 1 | 6 |
| mtot1    | 0 | 0 | 1 | 1 | 1 | 0 | 1 | 1 | 1 | 6 |
| anapc16  | 0 | 0 | 1 | 0 | 1 | 1 | 1 | 1 | 1 | 6 |
| rnaseh2a | 0 | 0 | 1 | 1 | 1 | 1 | 1 | 1 | 0 | 6 |
| ccdc86   | 0 | 0 | 1 | 1 | 1 | 1 | 0 | 1 | 1 | 6 |
| xpr1     | 0 | 0 | 1 | 1 | 1 | 1 | 1 | 0 | 1 | 6 |
| camsap2  | 0 | 0 | 1 | 0 | 1 | 1 | 1 | 1 | 1 | 6 |
| tfip11   | 0 | 0 | 1 | 1 | 1 | 1 | 0 | 1 | 1 | 6 |
| e2f6     | 0 | 0 | 1 | 1 | 1 | 1 | 0 | 1 | 1 | 6 |
| kif23    | 0 | 0 | 1 | 0 | 1 | 1 | 1 | 1 | 1 | 6 |
| cep57    | 0 | 0 | 1 | 0 | 1 | 1 | 1 | 1 | 1 | 6 |
| kctd3    | 0 | 0 | 1 | 1 | 1 | 1 | 1 | 0 | 1 | 6 |
| eprs     | 0 | 0 | 1 | 0 | 1 | 1 | 1 | 1 | 1 | 6 |
| nek4     | 0 | 0 | 1 | 0 | 1 | 1 | 1 | 1 | 1 | 6 |
| nucks1   | 0 | 0 | 1 | 1 | 1 | 1 | 0 | 1 | 1 | 6 |
| rs124d1  | 0 | 0 | 1 | 0 | 1 | 1 | 1 | 1 | 1 | 6 |
| ercc2    | 0 | 0 | 1 | 1 | 1 | 1 | 1 | 0 | 1 | 6 |
| adam17   | 0 | 0 | 1 | 1 | 1 | 1 | 1 | 1 | 0 | 6 |
| cpt2     | 0 | 0 | 1 | 0 | 1 | 1 | 1 | 1 | 1 | 6 |
| cdca7    | 0 | 0 | 1 | 1 | 1 | 1 | 1 | 0 | 1 | 6 |
| pcgf5    | 0 | 0 | 1 | 1 | 1 | 1 | 0 | 1 | 1 | 6 |
| rab2a    | 0 | 0 | 1 | 1 | 1 | 1 | 1 | 0 | 1 | 6 |
| tmem63b  | 0 | 0 | 1 | 1 | 1 | 0 | 1 | 1 | 1 | 6 |
| pold3    | 0 | 0 | 1 | 0 | 1 | 1 | 1 | 1 | 1 | 6 |
| psip1    | 0 | 0 | 1 | 0 | 1 | 1 | 1 | 1 | 1 | 6 |
| xpo4     | 0 | 0 | 1 | 1 | 1 | 0 | 1 | 1 | 1 | 6 |
| uqcc1    | 0 | 0 | 1 | 1 | 1 | 0 | 1 | 1 | 1 | 6 |
| kif20b   | 0 | 0 | 1 | 0 | 1 | 1 | 1 | 1 | 1 | 6 |

|          |   |   |   |   |   |   |   |   |   |   |
|----------|---|---|---|---|---|---|---|---|---|---|
| tcfl5    | 0 | 0 | 1 | 1 | 1 | 1 | 0 | 1 | 1 | 6 |
| rptor    | 0 | 0 | 1 | 0 | 1 | 1 | 1 | 1 | 1 | 6 |
| mkrn1    | 0 | 0 | 1 | 0 | 1 | 1 | 1 | 1 | 1 | 6 |
| arfgap1  | 0 | 0 | 1 | 1 | 1 | 1 | 0 | 1 | 1 | 6 |
| e2f5     | 0 | 0 | 1 | 0 | 1 | 1 | 1 | 1 | 1 | 6 |
| cep89    | 0 | 0 | 1 | 1 | 1 | 1 | 0 | 1 | 1 | 6 |
| thoc5    | 0 | 0 | 1 | 1 | 1 | 1 | 0 | 1 | 1 | 6 |
| aprt     | 0 | 0 | 1 | 1 | 1 | 0 | 1 | 1 | 1 | 6 |
| phf20    | 0 | 0 | 1 | 1 | 1 | 1 | 0 | 1 | 1 | 6 |
| fsd1     | 0 | 0 | 1 | 1 | 1 | 0 | 1 | 1 | 1 | 6 |
| nudt5    | 0 | 0 | 1 | 1 | 1 | 1 | 0 | 1 | 1 | 6 |
| rab21    | 0 | 0 | 1 | 1 | 1 | 0 | 1 | 1 | 1 | 6 |
| p3h1     | 0 | 0 | 1 | 1 | 1 | 1 | 1 | 1 | 0 | 6 |
| clip4    | 0 | 0 | 1 | 1 | 1 | 1 | 0 | 1 | 1 | 6 |
| rnf141   | 0 | 0 | 1 | 0 | 1 | 1 | 1 | 1 | 1 | 6 |
| dicer1   | 0 | 0 | 1 | 1 | 1 | 1 | 0 | 1 | 1 | 6 |
| xpot     | 0 | 0 | 1 | 0 | 1 | 1 | 1 | 1 | 1 | 6 |
| atp6v1c1 | 0 | 0 | 1 | 1 | 1 | 1 | 0 | 1 | 1 | 6 |
| tmem116  | 0 | 0 | 1 | 1 | 1 | 0 | 1 | 1 | 1 | 6 |
| nudt7    | 0 | 0 | 1 | 0 | 1 | 1 | 1 | 1 | 1 | 6 |
| usp21    | 0 | 0 | 1 | 1 | 1 | 1 | 0 | 1 | 1 | 6 |
| ube3b    | 0 | 0 | 1 | 0 | 1 | 1 | 1 | 1 | 1 | 6 |
| csnk2a2  | 0 | 0 | 1 | 1 | 1 | 1 | 1 | 1 | 0 | 6 |
| nusap1   | 0 | 0 | 1 | 1 | 1 | 1 | 0 | 1 | 1 | 6 |
| pawr     | 0 | 0 | 1 | 0 | 1 | 1 | 1 | 1 | 1 | 6 |
| atf7ip   | 0 | 0 | 1 | 0 | 1 | 1 | 1 | 1 | 1 | 6 |
| uba5     | 0 | 0 | 1 | 1 | 1 | 1 | 0 | 1 | 1 | 6 |
| ankle2   | 0 | 0 | 1 | 1 | 1 | 1 | 0 | 1 | 1 | 6 |
| ensa     | 0 | 0 | 1 | 1 | 1 | 1 | 0 | 1 | 1 | 6 |
| slc15a4  | 0 | 0 | 1 | 1 | 1 | 0 | 1 | 1 | 1 | 6 |
| alg9     | 0 | 0 | 1 | 1 | 1 | 1 | 0 | 1 | 1 | 6 |
| ifngr1   | 0 | 0 | 1 | 1 | 1 | 1 | 1 | 0 | 1 | 6 |
| ppif     | 0 | 0 | 1 | 1 | 1 | 1 | 0 | 1 | 1 | 6 |
| sass6    | 0 | 0 | 1 | 0 | 1 | 1 | 1 | 1 | 1 | 6 |
| bclaf1   | 0 | 0 | 1 | 1 | 1 | 1 | 0 | 1 | 1 | 6 |
| fem1c    | 0 | 0 | 1 | 1 | 1 | 1 | 1 | 1 | 0 | 6 |
| prkaca   | 0 | 0 | 1 | 0 | 1 | 1 | 1 | 1 | 1 | 6 |
| nit1     | 0 | 0 | 1 | 0 | 1 | 1 | 1 | 1 | 1 | 6 |
| cnnm2    | 0 | 0 | 1 | 0 | 1 | 1 | 1 | 1 | 1 | 6 |
| cwf19l1  | 0 | 0 | 1 | 1 | 1 | 0 | 1 | 1 | 1 | 6 |
| nap1l1   | 0 | 0 | 1 | 1 | 1 | 1 | 0 | 1 | 1 | 6 |
| edem2    | 0 | 0 | 1 | 1 | 1 | 1 | 1 | 1 | 0 | 6 |
| necap2   | 0 | 0 | 1 | 1 | 1 | 1 | 0 | 1 | 1 | 6 |
| mettl1   | 0 | 0 | 1 | 0 | 1 | 1 | 1 | 1 | 1 | 6 |
| chmp1b   | 0 | 0 | 1 | 1 | 1 | 1 | 1 | 0 | 1 | 6 |

|         |   |   |   |   |   |   |   |   |   |   |
|---------|---|---|---|---|---|---|---|---|---|---|
| ndufaf5 | 0 | 0 | 1 | 1 | 1 | 0 | 1 | 1 | 1 | 6 |
| spag9   | 0 | 0 | 1 | 1 | 1 | 1 | 1 | 0 | 1 | 6 |
| scarb1  | 0 | 0 | 1 | 0 | 1 | 1 | 1 | 1 | 1 | 6 |
| cnih1   | 0 | 0 | 1 | 1 | 1 | 1 | 0 | 1 | 1 | 6 |
| cdc42   | 0 | 0 | 1 | 1 | 1 | 1 | 0 | 1 | 1 | 6 |
| l3mbtl2 | 0 | 0 | 1 | 1 | 1 | 0 | 1 | 1 | 1 | 6 |
| slc19a1 | 0 | 0 | 1 | 0 | 1 | 1 | 1 | 1 | 1 | 6 |
| dcaf7   | 0 | 0 | 1 | 1 | 1 | 1 | 0 | 1 | 1 | 6 |
| jun     | 0 | 0 | 1 | 1 | 1 | 1 | 1 | 0 | 1 | 6 |
| atf5    | 0 | 0 | 1 | 1 | 1 | 1 | 1 | 0 | 1 | 6 |
| faf1    | 0 | 0 | 1 | 1 | 1 | 1 | 0 | 1 | 1 | 6 |
| ube2h   | 0 | 0 | 1 | 1 | 1 | 1 | 1 | 0 | 1 | 6 |
| derl1   | 0 | 0 | 0 | 1 | 1 | 1 | 1 | 1 | 1 | 6 |
| pgk1    | 0 | 0 | 0 | 1 | 1 | 1 | 1 | 1 | 1 | 6 |
| ube3c   | 0 | 0 | 0 | 1 | 1 | 1 | 1 | 1 | 1 | 6 |
| polr3h  | 0 | 0 | 0 | 1 | 1 | 1 | 1 | 1 | 1 | 6 |
| xrcc5   | 0 | 0 | 0 | 1 | 1 | 1 | 1 | 1 | 1 | 6 |
| rit1    | 0 | 0 | 0 | 1 | 1 | 1 | 1 | 1 | 1 | 6 |
| mcm6    | 0 | 0 | 0 | 1 | 1 | 1 | 1 | 1 | 1 | 6 |
| rnf26   | 0 | 0 | 0 | 1 | 1 | 1 | 1 | 1 | 1 | 6 |
| imp4    | 0 | 0 | 0 | 1 | 1 | 1 | 1 | 1 | 1 | 6 |
| eef1a1  | 0 | 0 | 0 | 1 | 1 | 1 | 1 | 1 | 1 | 6 |
| tomm20  | 0 | 0 | 0 | 1 | 1 | 1 | 1 | 1 | 1 | 6 |
| mtmr6   | 0 | 0 | 0 | 1 | 1 | 1 | 1 | 1 | 1 | 6 |
| pgp     | 0 | 0 | 0 | 1 | 1 | 1 | 1 | 1 | 1 | 6 |
| rb1     | 0 | 0 | 0 | 1 | 1 | 1 | 1 | 1 | 1 | 6 |
| cdca4   | 0 | 0 | 0 | 1 | 1 | 1 | 1 | 1 | 1 | 6 |
| mib2    | 0 | 0 | 0 | 1 | 1 | 1 | 1 | 1 | 1 | 6 |
| h2afx   | 0 | 0 | 0 | 1 | 1 | 1 | 1 | 1 | 1 | 6 |
| fanci   | 0 | 0 | 0 | 1 | 1 | 1 | 1 | 1 | 1 | 6 |
| bre     | 0 | 0 | 0 | 1 | 1 | 1 | 1 | 1 | 1 | 6 |
| mcm10   | 0 | 0 | 0 | 1 | 1 | 1 | 1 | 1 | 1 | 6 |
| snap23  | 0 | 0 | 0 | 1 | 1 | 1 | 1 | 1 | 1 | 6 |
| stx2    | 0 | 0 | 0 | 1 | 1 | 1 | 1 | 1 | 1 | 6 |
| kif11   | 0 | 0 | 0 | 1 | 1 | 1 | 1 | 1 | 1 | 6 |
| exo1    | 0 | 0 | 0 | 1 | 1 | 1 | 1 | 1 | 1 | 6 |
| fen1    | 0 | 0 | 0 | 1 | 1 | 1 | 1 | 1 | 1 | 6 |
| gss     | 0 | 0 | 0 | 1 | 1 | 1 | 1 | 1 | 1 | 6 |
| fbxo9   | 0 | 0 | 0 | 1 | 1 | 1 | 1 | 1 | 1 | 6 |
| gdap2   | 0 | 0 | 0 | 1 | 1 | 1 | 1 | 1 | 1 | 6 |
| ankib1  | 0 | 0 | 0 | 1 | 1 | 1 | 1 | 1 | 1 | 6 |
| rnmt    | 0 | 0 | 0 | 1 | 1 | 1 | 1 | 1 | 1 | 6 |
| wac     | 0 | 0 | 0 | 1 | 1 | 1 | 1 | 1 | 1 | 6 |
| cbll1   | 0 | 0 | 0 | 1 | 1 | 1 | 1 | 1 | 1 | 6 |
| hspa5   | 0 | 0 | 0 | 1 | 1 | 1 | 1 | 1 | 1 | 6 |



|          |   |   |   |   |   |   |   |   |   |   |
|----------|---|---|---|---|---|---|---|---|---|---|
| cdc42bpa | 0 | 0 | 0 | 1 | 1 | 1 | 1 | 1 | 1 | 6 |
| rpl37a   | 0 | 0 | 0 | 1 | 1 | 1 | 1 | 1 | 1 | 6 |
| coq10b   | 0 | 0 | 0 | 1 | 1 | 1 | 1 | 1 | 1 | 6 |
| rhno1    | 0 | 0 | 0 | 1 | 1 | 1 | 1 | 1 | 1 | 6 |
| rmnd5a   | 0 | 0 | 0 | 1 | 1 | 1 | 1 | 1 | 1 | 6 |
| mturn    | 0 | 0 | 0 | 1 | 1 | 1 | 1 | 1 | 1 | 6 |
| mcm3     | 0 | 0 | 0 | 1 | 1 | 1 | 1 | 1 | 1 | 6 |
| sec63    | 0 | 0 | 0 | 1 | 1 | 1 | 1 | 1 | 1 | 6 |
| dlgap5   | 0 | 0 | 0 | 1 | 1 | 1 | 1 | 1 | 1 | 6 |
| golgb1   | 0 | 0 | 0 | 1 | 1 | 1 | 1 | 1 | 1 | 6 |
| EIF4B    | 0 | 0 | 0 | 1 | 1 | 1 | 1 | 1 | 1 | 6 |
| zbtb44   | 0 | 0 | 0 | 1 | 1 | 1 | 1 | 1 | 1 | 6 |
| slc7a11  | 0 | 0 | 0 | 1 | 1 | 1 | 1 | 1 | 1 | 6 |
| lactb2   | 0 | 0 | 0 | 1 | 1 | 1 | 1 | 1 | 1 | 6 |
| mrpl35   | 0 | 0 | 0 | 1 | 1 | 1 | 1 | 1 | 1 | 6 |
| kif22    | 0 | 0 | 0 | 1 | 1 | 1 | 1 | 1 | 1 | 6 |
| zak      | 0 | 0 | 0 | 1 | 1 | 1 | 1 | 1 | 1 | 6 |
| ccnf     | 0 | 0 | 0 | 1 | 1 | 1 | 1 | 1 | 1 | 6 |
| eef1d    | 0 | 0 | 0 | 1 | 1 | 1 | 1 | 1 | 1 | 6 |
| pard3    | 0 | 0 | 0 | 1 | 1 | 1 | 1 | 1 | 1 | 6 |
| il6st    | 0 | 0 | 0 | 1 | 1 | 1 | 1 | 1 | 1 | 6 |
| chchd3   | 0 | 0 | 0 | 1 | 1 | 1 | 1 | 1 | 1 | 6 |
| pphln1   | 0 | 0 | 0 | 1 | 1 | 1 | 1 | 1 | 1 | 6 |
| recql4   | 0 | 0 | 0 | 1 | 1 | 1 | 1 | 1 | 1 | 6 |
| mtdh     | 0 | 0 | 0 | 1 | 1 | 1 | 1 | 1 | 1 | 6 |
| cand1    | 0 | 0 | 0 | 1 | 1 | 1 | 1 | 1 | 1 | 6 |
| fam46c   | 0 | 0 | 0 | 1 | 1 | 1 | 1 | 1 | 1 | 6 |
| stmn1    | 0 | 0 | 0 | 1 | 1 | 1 | 1 | 1 | 1 | 6 |
| gramd4   | 0 | 0 | 0 | 1 | 1 | 1 | 1 | 1 | 1 | 6 |
| slc12a2  | 0 | 0 | 0 | 1 | 1 | 1 | 1 | 1 | 1 | 6 |
| jund     | 0 | 0 | 0 | 1 | 1 | 1 | 1 | 1 | 1 | 6 |
| rad54l   | 0 | 0 | 0 | 1 | 1 | 1 | 1 | 1 | 1 | 6 |
| fanca    | 0 | 0 | 0 | 1 | 1 | 1 | 1 | 1 | 1 | 6 |
| rrp12    | 0 | 0 | 0 | 1 | 1 | 1 | 1 | 1 | 1 | 6 |
| prim1    | 0 | 0 | 0 | 1 | 1 | 1 | 1 | 1 | 1 | 6 |
| ints2    | 0 | 0 | 0 | 1 | 1 | 1 | 1 | 1 | 1 | 6 |
| p4ha1    | 0 | 0 | 0 | 1 | 1 | 1 | 1 | 1 | 1 | 6 |
| btbd7    | 0 | 0 | 0 | 1 | 1 | 1 | 1 | 1 | 1 | 6 |
| ythdf2   | 0 | 0 | 0 | 1 | 1 | 1 | 1 | 1 | 1 | 6 |
| bmp2k    | 0 | 0 | 0 | 1 | 1 | 1 | 1 | 1 | 1 | 6 |
| fam160b1 | 0 | 0 | 0 | 1 | 1 | 1 | 1 | 1 | 1 | 6 |
| agbl5    | 0 | 0 | 0 | 1 | 1 | 1 | 1 | 1 | 1 | 6 |
| atad2    | 0 | 0 | 0 | 1 | 1 | 1 | 1 | 1 | 1 | 6 |
| lcmt2    | 0 | 0 | 0 | 1 | 1 | 1 | 1 | 1 | 1 | 6 |
| ccni     | 0 | 0 | 0 | 1 | 1 | 1 | 1 | 1 | 1 | 6 |

|         |   |   |   |   |   |   |   |   |   |   |
|---------|---|---|---|---|---|---|---|---|---|---|
| gpatch2 | 0 | 0 | 0 | 1 | 1 | 1 | 1 | 1 | 1 | 6 |
| haus8   | 0 | 0 | 0 | 1 | 1 | 1 | 1 | 1 | 1 | 6 |
| tpgs2   | 0 | 0 | 0 | 1 | 1 | 1 | 1 | 1 | 1 | 6 |
| dtymk   | 0 | 0 | 0 | 1 | 1 | 1 | 1 | 1 | 1 | 6 |
| higd1a  | 0 | 0 | 0 | 1 | 1 | 1 | 1 | 1 | 1 | 6 |
| fem1b   | 0 | 0 | 0 | 1 | 1 | 1 | 1 | 1 | 1 | 6 |
| gclm    | 0 | 0 | 0 | 1 | 1 | 1 | 1 | 1 | 1 | 6 |
| ncor2   | 0 | 0 | 0 | 1 | 1 | 1 | 1 | 1 | 1 | 6 |
| cebpg   | 0 | 0 | 0 | 1 | 1 | 1 | 1 | 1 | 1 | 6 |
| ska2    | 0 | 0 | 0 | 1 | 1 | 1 | 1 | 1 | 1 | 6 |
| gclc    | 0 | 0 | 0 | 1 | 1 | 1 | 1 | 1 | 1 | 6 |
| chaf1b  | 0 | 0 | 0 | 1 | 1 | 1 | 1 | 1 | 1 | 6 |
| rbm18   | 0 | 0 | 0 | 1 | 1 | 1 | 1 | 1 | 1 | 6 |
| jmy     | 0 | 0 | 0 | 1 | 1 | 1 | 1 | 1 | 1 | 6 |
| tug1    | 0 | 0 | 0 | 1 | 1 | 1 | 1 | 1 | 1 | 6 |
| hnrnpu  | 0 | 0 | 0 | 1 | 1 | 1 | 1 | 1 | 1 | 6 |
| cenpe   | 0 | 0 | 0 | 1 | 1 | 1 | 1 | 1 | 1 | 6 |
| hnrnp1l | 0 | 0 | 0 | 1 | 1 | 1 | 1 | 1 | 1 | 6 |
| cdc6    | 0 | 0 | 0 | 1 | 1 | 1 | 1 | 1 | 1 | 6 |
| cse1l   | 0 | 0 | 0 | 1 | 1 | 1 | 1 | 1 | 1 | 6 |
| slco2a1 | 1 | 0 | 1 | 1 | 1 | 0 | 0 | 0 | 1 | 5 |
| cnot7   | 1 | 0 | 0 | 1 | 1 | 0 | 0 | 1 | 1 | 5 |
| sun2    | 1 | 0 | 1 | 1 | 1 | 0 | 0 | 0 | 1 | 5 |
| zfp82   | 1 | 0 | 1 | 0 | 1 | 1 | 0 | 1 | 0 | 5 |
| tyro3   | 1 | 0 | 1 | 1 | 1 | 0 | 0 | 0 | 1 | 5 |
| hrasls  | 1 | 0 | 1 | 1 | 1 | 1 | 0 | 0 | 0 | 5 |
| tusc3   | 1 | 0 | 0 | 1 | 1 | 1 | 0 | 1 | 0 | 5 |
| ints10  | 1 | 0 | 1 | 0 | 1 | 0 | 1 | 1 | 0 | 5 |
| kpna1   | 1 | 0 | 0 | 1 | 1 | 1 | 0 | 0 | 1 | 5 |
| frmd5   | 1 | 0 | 1 | 1 | 1 | 1 | 0 | 0 | 0 | 5 |
| fkbp4   | 1 | 0 | 0 | 0 | 1 | 1 | 0 | 1 | 1 | 5 |
| rgs17   | 1 | 0 | 0 | 1 | 1 | 1 | 0 | 1 | 0 | 5 |
| rragd   | 1 | 0 | 1 | 0 | 1 | 0 | 1 | 0 | 1 | 5 |
| smim14  | 1 | 0 | 0 | 1 | 1 | 0 | 0 | 1 | 1 | 5 |
| slc2a8  | 1 | 0 | 1 | 1 | 1 | 0 | 0 | 0 | 1 | 5 |
| tmem8a  | 1 | 0 | 0 | 1 | 0 | 1 | 1 | 0 | 1 | 5 |
| crk     | 1 | 0 | 1 | 0 | 1 | 1 | 0 | 1 | 0 | 5 |
| ak4     | 1 | 1 | 0 | 1 | 1 | 0 | 0 | 1 | 0 | 5 |
| h2afj   | 1 | 0 | 0 | 0 | 1 | 1 | 0 | 1 | 1 | 5 |
| dfna5   | 1 | 0 | 0 | 1 | 1 | 0 | 0 | 1 | 1 | 5 |
| snrpb2  | 1 | 0 | 0 | 1 | 1 | 0 | 0 | 1 | 1 | 5 |
| bcl7c   | 1 | 0 | 0 | 1 | 1 | 0 | 0 | 1 | 1 | 5 |
| lias    | 1 | 0 | 0 | 0 | 1 | 1 | 1 | 0 | 1 | 5 |
| rab40b  | 1 | 0 | 0 | 1 | 1 | 1 | 0 | 0 | 1 | 5 |
| rora    | 1 | 0 | 0 | 1 | 1 | 1 | 0 | 1 | 0 | 5 |

|          |   |   |   |   |   |   |   |   |   |   |
|----------|---|---|---|---|---|---|---|---|---|---|
| nmrk1    | 1 | 0 | 0 | 1 | 1 | 1 | 0 | 0 | 1 | 5 |
| nek3     | 1 | 0 | 0 | 0 | 1 | 1 | 1 | 1 | 0 | 5 |
| cd109    | 1 | 0 | 0 | 0 | 1 | 1 | 1 | 0 | 1 | 5 |
| mepce    | 1 | 0 | 1 | 0 | 1 | 1 | 0 | 1 | 0 | 5 |
| polb     | 1 | 0 | 1 | 0 | 1 | 0 | 0 | 1 | 1 | 5 |
| c3       | 1 | 1 | 0 | 0 | 1 | 1 | 0 | 0 | 1 | 5 |
| snapc4   | 1 | 0 | 0 | 1 | 0 | 0 | 1 | 1 | 1 | 5 |
| cryz1    | 1 | 0 | 0 | 0 | 1 | 1 | 1 | 1 | 0 | 5 |
| pel12    | 1 | 0 | 1 | 0 | 1 | 1 | 1 | 0 | 0 | 5 |
| wdr45b   | 1 | 0 | 1 | 1 | 1 | 1 | 0 | 0 | 0 | 5 |
| cbs      | 1 | 1 | 0 | 1 | 1 | 0 | 0 | 0 | 1 | 5 |
| sec61a2  | 1 | 0 | 0 | 1 | 1 | 0 | 0 | 1 | 1 | 5 |
| arrdc1   | 1 | 0 | 0 | 0 | 1 | 0 | 1 | 1 | 1 | 5 |
| ddias    | 1 | 0 | 0 | 0 | 1 | 1 | 1 | 1 | 0 | 5 |
| mbnl3    | 1 | 0 | 0 | 0 | 1 | 1 | 0 | 1 | 1 | 5 |
| cog1     | 1 | 0 | 1 | 0 | 1 | 0 | 0 | 1 | 1 | 5 |
| tbk1     | 1 | 0 | 1 | 1 | 1 | 1 | 0 | 0 | 0 | 5 |
| b4galnt1 | 1 | 0 | 1 | 1 | 1 | 0 | 0 | 0 | 1 | 5 |
| ddrgk1   | 1 | 0 | 1 | 1 | 1 | 0 | 0 | 1 | 0 | 5 |
| plcx1    | 1 | 0 | 0 | 1 | 1 | 1 | 0 | 0 | 1 | 5 |
| ccna2    | 1 | 0 | 0 | 0 | 0 | 1 | 1 | 1 | 1 | 5 |
| adck2    | 1 | 0 | 0 | 0 | 1 | 1 | 0 | 1 | 1 | 5 |
| sept9    | 1 | 0 | 1 | 0 | 1 | 1 | 0 | 0 | 1 | 5 |
| agpat5   | 1 | 0 | 0 | 0 | 1 | 0 | 1 | 1 | 1 | 5 |
| fkbp1a   | 1 | 0 | 0 | 1 | 1 | 0 | 1 | 1 | 0 | 5 |
| get4     | 1 | 0 | 1 | 0 | 1 | 0 | 0 | 1 | 1 | 5 |
| mrps26   | 1 | 0 | 0 | 0 | 1 | 0 | 1 | 1 | 1 | 5 |
| gsto2    | 1 | 0 | 1 | 1 | 0 | 1 | 0 | 1 | 0 | 5 |
| figl1    | 1 | 0 | 0 | 1 | 1 | 1 | 0 | 0 | 1 | 5 |
| dock10   | 1 | 0 | 0 | 1 | 1 | 0 | 1 | 1 | 0 | 5 |
| tmem107  | 1 | 0 | 0 | 0 | 1 | 1 | 1 | 0 | 1 | 5 |
| shroom3  | 1 | 0 | 0 | 1 | 1 | 1 | 0 | 1 | 0 | 5 |
| chrb1    | 1 | 0 | 1 | 1 | 1 | 0 | 0 | 0 | 1 | 5 |
| e2f8     | 1 | 0 | 0 | 0 | 1 | 1 | 1 | 0 | 1 | 5 |
| dlc1     | 1 | 0 | 0 | 1 | 1 | 0 | 1 | 0 | 1 | 5 |
| cpsf4    | 1 | 0 | 0 | 1 | 0 | 1 | 0 | 1 | 1 | 5 |
| ccdc62   | 1 | 0 | 1 | 1 | 0 | 0 | 1 | 1 | 0 | 5 |
| snrpd1   | 1 | 0 | 1 | 1 | 0 | 1 | 0 | 0 | 1 | 5 |
| ncoa1    | 1 | 0 | 0 | 1 | 1 | 0 | 0 | 1 | 1 | 5 |
| lrrc1    | 1 | 0 | 1 | 0 | 0 | 1 | 0 | 1 | 1 | 5 |
| fam49a   | 1 | 0 | 0 | 0 | 1 | 1 | 1 | 1 | 0 | 5 |
| ggps1    | 1 | 0 | 0 | 0 | 1 | 1 | 1 | 1 | 0 | 5 |
| gab2     | 1 | 0 | 0 | 1 | 1 | 0 | 1 | 1 | 0 | 5 |
| drg2     | 1 | 0 | 1 | 0 | 1 | 0 | 0 | 1 | 1 | 5 |
| tmem256  | 1 | 0 | 1 | 0 | 1 | 0 | 1 | 1 | 0 | 5 |

|          |   |   |   |   |   |   |   |   |   |   |
|----------|---|---|---|---|---|---|---|---|---|---|
| cops3    | 1 | 0 | 0 | 1 | 1 | 0 | 0 | 1 | 1 | 5 |
| cant1    | 1 | 0 | 1 | 1 | 1 | 0 | 1 | 0 | 0 | 5 |
| ccdc92   | 1 | 0 | 0 | 1 | 1 | 1 | 1 | 0 | 0 | 5 |
| bmp1     | 1 | 0 | 1 | 1 | 1 | 0 | 0 | 0 | 1 | 5 |
| tubb2b   | 1 | 0 | 0 | 1 | 1 | 1 | 0 | 1 | 0 | 5 |
| ephb4    | 1 | 0 | 1 | 0 | 1 | 1 | 0 | 0 | 1 | 5 |
| slc30a9  | 1 | 0 | 0 | 1 | 1 | 1 | 0 | 0 | 1 | 5 |
| trim8    | 1 | 0 | 1 | 1 | 1 | 0 | 0 | 0 | 1 | 5 |
| cds1     | 1 | 0 | 1 | 1 | 0 | 0 | 1 | 1 | 0 | 5 |
| nup62cl  | 1 | 0 | 0 | 1 | 0 | 1 | 1 | 0 | 1 | 5 |
| ube2k    | 1 | 0 | 0 | 0 | 1 | 1 | 0 | 1 | 1 | 5 |
| nrip3    | 1 | 0 | 1 | 1 | 1 | 0 | 0 | 0 | 1 | 5 |
| slc20a2  | 1 | 0 | 0 | 0 | 1 | 1 | 0 | 1 | 1 | 5 |
| abl1     | 1 | 0 | 1 | 0 | 1 | 0 | 1 | 1 | 0 | 5 |
| lama1    | 1 | 0 | 1 | 0 | 1 | 1 | 0 | 1 | 0 | 5 |
| f2rl2    | 1 | 0 | 0 | 1 | 1 | 0 | 1 | 0 | 1 | 5 |
| ndrg1    | 1 | 0 | 1 | 0 | 1 | 1 | 0 | 0 | 1 | 5 |
| dus1l    | 1 | 0 | 0 | 0 | 1 | 0 | 1 | 1 | 1 | 5 |
| tpp1     | 1 | 0 | 1 | 0 | 1 | 0 | 0 | 1 | 1 | 5 |
| arfgap3  | 1 | 0 | 1 | 0 | 1 | 1 | 1 | 0 | 0 | 5 |
| pros1    | 1 | 1 | 1 | 1 | 1 | 0 | 0 | 0 | 0 | 5 |
| serinc3  | 1 | 0 | 1 | 0 | 1 | 0 | 0 | 1 | 1 | 5 |
| add3     | 1 | 0 | 1 | 1 | 1 | 1 | 0 | 0 | 0 | 5 |
| itm2c    | 1 | 0 | 0 | 0 | 1 | 1 | 0 | 1 | 1 | 5 |
| epn2     | 1 | 0 | 0 | 1 | 1 | 0 | 1 | 1 | 0 | 5 |
| slc25a11 | 1 | 0 | 1 | 0 | 1 | 0 | 1 | 1 | 0 | 5 |
| c1qbp    | 1 | 0 | 1 | 0 | 1 | 0 | 0 | 1 | 1 | 5 |
| rabepk   | 1 | 0 | 0 | 1 | 1 | 0 | 0 | 1 | 1 | 5 |
| pdia5    | 1 | 0 | 1 | 1 | 0 | 0 | 1 | 1 | 0 | 5 |
| actr10   | 1 | 0 | 1 | 0 | 1 | 0 | 0 | 1 | 1 | 5 |
| donson   | 1 | 0 | 1 | 0 | 1 | 1 | 1 | 0 | 0 | 5 |
| il10rb   | 1 | 0 | 1 | 0 | 1 | 0 | 0 | 1 | 1 | 5 |
| ube2l6   | 1 | 0 | 0 | 0 | 1 | 1 | 1 | 0 | 1 | 5 |
| taok2    | 1 | 0 | 1 | 0 | 1 | 1 | 0 | 1 | 0 | 5 |
| nfxl1    | 1 | 0 | 0 | 0 | 1 | 0 | 1 | 1 | 1 | 5 |
| atp6v1a  | 1 | 0 | 1 | 1 | 1 | 0 | 0 | 1 | 0 | 5 |
| timmm10  | 1 | 0 | 0 | 0 | 1 | 0 | 1 | 1 | 1 | 5 |
| camk1    | 1 | 0 | 1 | 1 | 1 | 0 | 0 | 0 | 1 | 5 |
| EIF4A1   | 1 | 0 | 1 | 1 | 1 | 0 | 0 | 1 | 0 | 5 |
| mylk     | 1 | 0 | 1 | 1 | 0 | 1 | 0 | 0 | 1 | 5 |
| colgalt1 | 1 | 0 | 1 | 1 | 1 | 0 | 0 | 0 | 1 | 5 |
| rtn4ip1  | 1 | 0 | 0 | 0 | 1 | 1 | 1 | 0 | 1 | 5 |
| rcc1     | 1 | 0 | 0 | 0 | 1 | 1 | 0 | 1 | 1 | 5 |
| idh3b    | 1 | 0 | 0 | 1 | 1 | 1 | 0 | 1 | 0 | 5 |
| ralgds   | 1 | 0 | 1 | 1 | 1 | 0 | 0 | 1 | 0 | 5 |

|          |   |   |   |   |   |   |   |   |   |   |
|----------|---|---|---|---|---|---|---|---|---|---|
| smpdl3b  | 1 | 0 | 1 | 1 | 0 | 1 | 0 | 0 | 1 | 5 |
| tesk2    | 1 | 0 | 0 | 0 | 1 | 0 | 1 | 1 | 1 | 5 |
| mettl22  | 1 | 0 | 1 | 0 | 1 | 0 | 0 | 1 | 1 | 5 |
| tk2      | 1 | 0 | 0 | 0 | 1 | 1 | 0 | 1 | 1 | 5 |
| prkch    | 1 | 0 | 0 | 1 | 1 | 1 | 0 | 0 | 1 | 5 |
| prosc    | 1 | 0 | 1 | 1 | 1 | 0 | 0 | 1 | 0 | 5 |
| notch1   | 1 | 0 | 1 | 1 | 1 | 0 | 0 | 0 | 1 | 5 |
| itgae    | 1 | 0 | 1 | 0 | 1 | 1 | 0 | 1 | 0 | 5 |
| tubb4b   | 1 | 0 | 0 | 1 | 1 | 0 | 1 | 1 | 0 | 5 |
| plcb1    | 1 | 0 | 0 | 0 | 1 | 1 | 0 | 1 | 1 | 5 |
| fpgs     | 1 | 0 | 0 | 0 | 1 | 0 | 1 | 1 | 1 | 5 |
| spag5    | 1 | 0 | 0 | 0 | 1 | 1 | 0 | 1 | 1 | 5 |
| lancl2   | 1 | 0 | 0 | 1 | 1 | 0 | 0 | 1 | 1 | 5 |
| hspa9    | 1 | 0 | 1 | 0 | 1 | 0 | 1 | 0 | 1 | 5 |
| pcyox1   | 1 | 0 | 1 | 0 | 1 | 0 | 0 | 1 | 1 | 5 |
| slc25a15 | 1 | 0 | 0 | 1 | 1 | 0 | 1 | 0 | 1 | 5 |
| ccnc     | 1 | 0 | 1 | 0 | 1 | 0 | 0 | 1 | 1 | 5 |
| kdelr2   | 1 | 0 | 0 | 1 | 1 | 1 | 1 | 0 | 0 | 5 |
| ccdc59   | 1 | 0 | 1 | 0 | 1 | 0 | 1 | 0 | 1 | 5 |
| slc25a37 | 1 | 0 | 0 | 0 | 1 | 1 | 1 | 0 | 1 | 5 |
| sat2     | 1 | 0 | 1 | 0 | 1 | 1 | 0 | 0 | 1 | 5 |
| sdha     | 1 | 0 | 0 | 1 | 1 | 0 | 0 | 1 | 1 | 5 |
| adipor1  | 1 | 0 | 1 | 1 | 1 | 0 | 0 | 1 | 0 | 5 |
| ehmt2    | 1 | 0 | 0 | 0 | 1 | 1 | 1 | 0 | 1 | 5 |
| dcaf4    | 1 | 0 | 1 | 1 | 1 | 0 | 0 | 1 | 0 | 5 |
| rhbdd2   | 1 | 0 | 0 | 0 | 1 | 1 | 0 | 1 | 1 | 5 |
| elif4e3  | 1 | 0 | 0 | 0 | 1 | 1 | 1 | 0 | 1 | 5 |
| nfatc3   | 1 | 0 | 1 | 0 | 1 | 1 | 0 | 0 | 1 | 5 |
| acox1    | 1 | 0 | 0 | 1 | 1 | 1 | 0 | 0 | 1 | 5 |
| ppm1d    | 1 | 0 | 0 | 1 | 1 | 1 | 1 | 0 | 0 | 5 |
| psmf1    | 1 | 0 | 0 | 0 | 1 | 1 | 0 | 1 | 1 | 5 |
| polr2b   | 1 | 0 | 0 | 1 | 1 | 0 | 1 | 1 | 0 | 5 |
| zmynd19  | 1 | 0 | 0 | 0 | 1 | 0 | 1 | 1 | 1 | 5 |
| slc38a10 | 1 | 0 | 0 | 0 | 1 | 1 | 1 | 0 | 1 | 5 |
| fam175b  | 1 | 0 | 1 | 0 | 1 | 1 | 0 | 0 | 1 | 5 |
| ptges2   | 1 | 0 | 0 | 0 | 1 | 1 | 1 | 1 | 0 | 5 |
| adprm    | 1 | 0 | 0 | 0 | 1 | 0 | 1 | 1 | 1 | 5 |
| sdhaf2   | 1 | 0 | 0 | 0 | 1 | 1 | 1 | 1 | 0 | 5 |
| mak16    | 1 | 0 | 0 | 0 | 1 | 1 | 0 | 1 | 1 | 5 |
| sh3bgrl2 | 1 | 0 | 0 | 0 | 1 | 1 | 0 | 1 | 1 | 5 |
| lsm14b   | 1 | 0 | 1 | 0 | 1 | 0 | 1 | 0 | 1 | 5 |
| zmynd8   | 1 | 0 | 1 | 0 | 1 | 0 | 1 | 1 | 0 | 5 |
| arpp19   | 1 | 0 | 1 | 1 | 1 | 0 | 0 | 1 | 0 | 5 |
| ddr1     | 1 | 0 | 1 | 1 | 1 | 0 | 0 | 1 | 0 | 5 |
| cript    | 1 | 0 | 0 | 0 | 1 | 0 | 1 | 1 | 1 | 5 |

|           |   |   |   |   |   |   |   |   |   |   |
|-----------|---|---|---|---|---|---|---|---|---|---|
| gstm4     | 1 | 0 | 1 | 1 | 0 | 1 | 0 | 0 | 1 | 5 |
| pld1      | 1 | 0 | 0 | 0 | 1 | 1 | 0 | 1 | 1 | 5 |
| fam171a1  | 1 | 0 | 1 | 1 | 1 | 0 | 0 | 1 | 0 | 5 |
| nsfl1c    | 1 | 0 | 0 | 1 | 1 | 0 | 0 | 1 | 1 | 5 |
| apmap     | 1 | 0 | 1 | 1 | 1 | 0 | 0 | 0 | 1 | 5 |
| mrpl12    | 1 | 0 | 0 | 0 | 1 | 0 | 1 | 1 | 1 | 5 |
| ppp1r3c   | 1 | 0 | 1 | 1 | 1 | 0 | 0 | 0 | 1 | 5 |
| coq8a     | 1 | 0 | 0 | 1 | 1 | 0 | 1 | 0 | 1 | 5 |
| thyn1     | 1 | 0 | 0 | 0 | 1 | 1 | 0 | 1 | 1 | 5 |
| fam198b   | 1 | 0 | 1 | 1 | 1 | 1 | 0 | 0 | 0 | 5 |
| tnfrsf1a  | 1 | 0 | 1 | 0 | 0 | 1 | 1 | 0 | 1 | 5 |
| ndufv2    | 1 | 0 | 0 | 0 | 1 | 0 | 1 | 1 | 1 | 5 |
| lef1      | 1 | 0 | 1 | 1 | 1 | 0 | 0 | 1 | 0 | 5 |
| def8      | 1 | 0 | 0 | 1 | 1 | 0 | 0 | 1 | 1 | 5 |
| ctsc      | 1 | 0 | 0 | 1 | 1 | 1 | 0 | 0 | 1 | 5 |
| rpp25l    | 1 | 0 | 1 | 0 | 1 | 0 | 0 | 1 | 1 | 5 |
| linc00339 | 1 | 0 | 0 | 1 | 0 | 1 | 1 | 0 | 1 | 5 |
| nup50     | 1 | 0 | 0 | 0 | 1 | 1 | 0 | 1 | 1 | 5 |
| thoc1     | 1 | 0 | 1 | 0 | 1 | 0 | 0 | 1 | 1 | 5 |
| ifrd1     | 1 | 0 | 0 | 1 | 1 | 0 | 1 | 0 | 1 | 5 |
| man1b1    | 1 | 0 | 1 | 0 | 1 | 0 | 1 | 0 | 1 | 5 |
| cyb5d1    | 1 | 0 | 0 | 0 | 1 | 0 | 1 | 1 | 1 | 5 |
| nars2     | 1 | 0 | 0 | 0 | 1 | 1 | 1 | 0 | 1 | 5 |
| glmp      | 1 | 0 | 1 | 0 | 1 | 0 | 0 | 1 | 1 | 5 |
| errfi1    | 1 | 0 | 1 | 1 | 1 | 1 | 0 | 0 | 0 | 5 |
| umps      | 1 | 0 | 0 | 0 | 1 | 0 | 1 | 1 | 1 | 5 |
| xbp1      | 1 | 0 | 1 | 0 | 1 | 0 | 1 | 0 | 1 | 5 |
| ei24      | 1 | 0 | 1 | 1 | 1 | 0 | 0 | 1 | 0 | 5 |
| eif2ak4   | 1 | 0 | 0 | 0 | 1 | 1 | 0 | 1 | 1 | 5 |
| dpm2      | 1 | 0 | 0 | 1 | 1 | 0 | 0 | 1 | 1 | 5 |
| cntnap1   | 1 | 0 | 0 | 1 | 1 | 1 | 0 | 0 | 1 | 5 |
| fbln1     | 1 | 0 | 1 | 0 | 1 | 1 | 0 | 0 | 1 | 5 |
| cdip1     | 1 | 0 | 1 | 0 | 1 | 0 | 0 | 1 | 1 | 5 |
| cd2bp2    | 1 | 0 | 0 | 0 | 1 | 1 | 0 | 1 | 1 | 5 |
| ddx31     | 1 | 0 | 0 | 1 | 1 | 0 | 0 | 1 | 1 | 5 |
| pcna      | 1 | 0 | 0 | 1 | 1 | 1 | 0 | 0 | 1 | 5 |
| msrb2     | 1 | 0 | 0 | 0 | 1 | 1 | 1 | 0 | 1 | 5 |
| uckl1     | 1 | 0 | 0 | 0 | 1 | 1 | 0 | 1 | 1 | 5 |
| map1a     | 1 | 0 | 0 | 1 | 1 | 1 | 0 | 0 | 1 | 5 |
| ncstn     | 1 | 0 | 0 | 1 | 1 | 1 | 1 | 0 | 0 | 5 |
| cbx2      | 1 | 0 | 0 | 1 | 1 | 1 | 0 | 0 | 1 | 5 |
| agps      | 1 | 0 | 1 | 0 | 1 | 1 | 0 | 0 | 1 | 5 |
| phf23     | 1 | 0 | 0 | 0 | 1 | 1 | 0 | 1 | 1 | 5 |
| rcn3      | 1 | 0 | 1 | 1 | 1 | 0 | 0 | 0 | 1 | 5 |
| ppp3cc    | 1 | 0 | 1 | 0 | 1 | 0 | 0 | 1 | 1 | 5 |

|         |   |   |   |   |   |   |   |   |   |   |
|---------|---|---|---|---|---|---|---|---|---|---|
| prdm1   | 1 | 0 | 0 | 1 | 1 | 1 | 0 | 1 | 0 | 5 |
| rgs10   | 1 | 0 | 1 | 0 | 1 | 0 | 1 | 1 | 0 | 5 |
| pex16   | 1 | 0 | 1 | 1 | 1 | 0 | 0 | 1 | 0 | 5 |
| hirip3  | 1 | 0 | 0 | 0 | 1 | 1 | 1 | 0 | 1 | 5 |
| gmfb    | 1 | 0 | 0 | 1 | 1 | 1 | 0 | 1 | 0 | 5 |
| elp5    | 1 | 0 | 1 | 0 | 1 | 0 | 0 | 1 | 1 | 5 |
| slc5a6  | 1 | 0 | 1 | 1 | 0 | 0 | 1 | 0 | 1 | 5 |
| atg4a   | 1 | 0 | 0 | 1 | 1 | 0 | 1 | 1 | 0 | 5 |
| ube2e3  | 1 | 0 | 1 | 0 | 1 | 0 | 0 | 1 | 1 | 5 |
| fasn    | 1 | 0 | 0 | 0 | 1 | 1 | 1 | 0 | 1 | 5 |
| slc22a5 | 1 | 0 | 0 | 1 | 1 | 1 | 0 | 0 | 1 | 5 |
| lamp1   | 1 | 0 | 0 | 0 | 1 | 0 | 1 | 1 | 1 | 5 |
| bub3    | 1 | 0 | 0 | 0 | 1 | 1 | 0 | 1 | 1 | 5 |
| socs4   | 1 | 0 | 0 | 1 | 1 | 1 | 0 | 1 | 0 | 5 |
| bhlhb9  | 1 | 0 | 1 | 0 | 1 | 1 | 0 | 0 | 1 | 5 |
