# Supplementary material for: Intersection of the Orphan G Protein-Coupled Receptor, GPR19, with the Aging Process
Source: MDPI journal article supplement (doi:10.3390/ijms232113598), 2022-11-06
Supplement: s1 [file s1]

**Table S3.** Gene Ontology Term Enrichment Analysis. Using the Molecular Signatures Database (MSigDB) a Gene Ontology enrichment analysis was performed with GeneTrail v3.2 (<https://genetrail.bioinf.uni-sb.de/>). For each specifically enriched GO term (at least two independent proteins per term at a p value of >0.05) the total number of input hits (from the uploaded dataset), the expected number of hits as well as the adjusted p value of enrichment (plus the negative log10 version of this) is shown.

| GO Term                                                   | Number of hits | Expected score | Adjusted p-value | Negative Log p-value |
|-----------------------------------------------------------|----------------|----------------|------------------|----------------------|
| GO AGING                                                  | 50             | 3.52737        | 1.05127E-35      | 34.97828573          |
| GO REGULATION OF CELL DEATH                               | 79             | 18.6561        | 7.36466E-25      | 24.1328473           |
| GO RESPONSE TO OXYGEN CONTAINING COMPOUND                 | 76             | 18.0262        | 1.05775E-23      | 22.97561697          |
| GO RESPONSE TO OXIDATIVE STRESS                           | 43             | 4.90167        | 7.10949E-23      | 22.14816155          |
| GO RESPONSE TO ABIOTIC STIMULUS                           | 65             | 13.7888        | 3.60039E-22      | 21.44365045          |
| GO CELLULAR RESPONSE TO DNA DAMAGE STIMULUS               | 55             | 9.55138        | 4.87102E-22      | 21.31238009          |
| GO POSITIVE REGULATION OF PROTEIN METABOLIC PROCESS       | 73             | 18.1179        | 1.0093E-21       | 20.99597973          |
| GO CELLULAR RESPONSE TO OXYGEN CONTAINING COMPOUND        | 61             | 12.4832        | 1.78602E-21      | 20.74811368          |
| GO APOPTOTIC PROCESS                                      | 78             | 21.6796        | 9.7341E-21       | 20.0117042           |
| GO NEURON DEATH                                           | 37             | 3.8824         | 9.7341E-21       | 20.0117042           |
| GO DNA METABOLIC PROCESS                                  | 53             | 9.53993        | 1.16535E-20      | 19.93354362          |
| GO REGULATION OF PROTEIN MODIFICATION PROCESS             | 75             | 20.2595        | 1.57219E-20      | 19.80349497          |
| GO CELLULAR RESPONSE TO OXIDATIVE STRESS                  | 34             | 3.2296         | 3.29551E-20      | 19.48207737          |
| GO REGULATION OF RESPONSE TO STRESS                       | 67             | 16.3427        | 3.46277E-20      | 19.46057635          |
| GO NEGATIVE REGULATION OF CELL DEATH                      | 55             | 11.0173        | 1.27547E-19      | 18.89432975          |
| GO CELL AGING                                             | 24             | 1.19106        | 1.72489E-19      | 18.7632386           |
| GO POSITIVE REGULATION OF BIOSYNTHETIC PROCESS            | 77             | 22.3896        | 1.72489E-19      | 18.7632386           |
| GO POSITIVE REGULATION OF CELLULAR COMPONENT ORGANIZATION | 60             | 13.4338        | 1.72489E-19      | 18.7632386           |
| GO CELLULAR RESPONSE TO NITROGEN COMPOUND                 | 45             | 7.112          | 2.3312E-19       | 18.63242047          |
| GO RESPONSE TO NITROGEN COMPOUND                          | 54             | 10.9142        | 3.7816E-19       | 18.42232441          |
| GO HOMEOSTATIC PROCESS                                    | 74             | 21.3131        | 8.03674E-19      | 18.09492008          |
| GO POSITIVE REGULATION OF PROTEIN MODIFICATION PROCESS    | 59             | 13.5483        | 1.13037E-18      | 17.94677938          |
| GO REGULATION OF CELL POPULATION PROLIFERATION            | 67             | 18.0377        | 3.83693E-18      | 17.41601612          |
| GO RESPONSE TO INORGANIC SUBSTANCE                        | 41             | 6.25306        | 5.18387E-18      | 17.2853459           |
| GO RESPONSE TO ENDOGENOUS STIMULUS                        | 67             | 18.324         | 8.00759E-18      | 17.09649817          |
| GO NEGATIVE REGULATION OF RESPONSE TO STIMULUS            | 66             | 17.8774        | 1.00838E-17      | 16.99637578          |
| GO REGULATION OF CELLULAR RESPONSE TO STRESS              | 45             | 7.94803        | 1.05275E-17      | 16.97767475          |
| GO DNA REPAIR                                             | 40             | 6.13854        | 1.68656E-17      | 16.7729982           |
| GO POSITIVE REGULATION OF CELL DEATH                      | 44             | 7.66172        | 1.68656E-17      | 16.7729982           |
| GO REGULATION OF PHOSPHORUS METABOLIC PROCESS             | 66             | 18.6218        | 6.97793E-17      | 16.15627339          |
| GO NEGATIVE REGULATION OF PROTEIN METABOLIC PROCESS       | 52             | 11.7846        | 2.03335E-16      | 15.69178786          |
| GO REGULATION OF CATABOLIC PROCESS                        | 50             | 10.8799        | 2.18673E-16      | 15.66020484          |
| GO REGULATION OF CELLULAR CATABOLIC PROCESS               | 46             | 9.12764        | 2.4163E-16       | 15.61684915          |
| GO RESPONSE TO REACTIVE OXYGEN SPECIES                    | 27             | 2.49664        | 3.11725E-16      | 15.50622837          |
| GO POSITIVE REGULATION OF PHOSPHORUS METABOLIC PROCESS    | 52             | 12.0137        | 3.98929E-16      | 15.39910439          |
| GO REACTIVE OXYGEN SPECIES METABOLIC PROCESS              | 24             | 1.8324         | 5.66731E-16      | 15.24662303          |

|                                                            |    |          |             |             |
|------------------------------------------------------------|----|----------|-------------|-------------|
| GO AMYLOID BETA METABOLIC PROCESS                          | 16 | 0.4581   | 7.32308E-16 | 15.13530622 |
| GO POSITIVE REGULATION OF CATABOLIC PROCESS                | 34 | 4.74133  | 7.95912E-16 | 15.09913495 |
| GO REGULATION OF INTRACELLULAR SIGNAL TRANSDUCTION         | 67 | 20.2824  | 9.28549E-16 | 15.03219517 |
| GO CELLULAR RESPONSE TO ENDOGENOUS STIMULUS                | 58 | 15.3807  | 1.06098E-15 | 14.9742928  |
| GO RESPONSE TO DRUG                                        | 50 | 11.4754  | 1.4265E-15  | 14.84572822 |
| GO RESPONSE TO PEPTIDE                                     | 36 | 5.62318  | 1.9422E-15  | 14.71170605 |
| GO CHROMOSOME ORGANIZATION                                 | 54 | 13.5483  | 1.95997E-15 | 14.70775058 |
| GO POSITIVE REGULATION OF DEVELOPMENTAL PROCESS            | 57 | 15.1746  | 2.438E-15   | 14.6129663  |
| GO REGULATION OF REACTIVE OXYGEN SPECIES METABOLIC PROCESS | 20 | 1.14525  | 2.82016E-15 | 14.54972625 |
| GO REGULATION OF TRANSFERASE ACTIVITY                      | 48 | 10.7768  | 2.98908E-15 | 14.52446246 |
| GO POSITIVE REGULATION OF SIGNALING                        | 66 | 20.3167  | 3.47562E-15 | 14.45896771 |
| GO GROWTH                                                  | 48 | 10.9715  | 5.66367E-15 | 14.24690206 |
| GO PROTEIN PHOSPHORYLATION                                 | 68 | 21.7941  | 6.78852E-15 | 14.1682249  |
| GO NEGATIVE REGULATION OF DEVELOPMENTAL PROCESS            | 47 | 10.6165  | 8.13817E-15 | 14.08947324 |
| GO RESPONSE TO EXTRACELLULAR STIMULUS                      | 36 | 5.9553   | 8.90904E-15 | 14.05016909 |
| GO CELLULAR RESPONSE TO TOXIC SUBSTANCE                    | 26 | 2.65698  | 8.92744E-15 | 14.04927306 |
| GO NEGATIVE REGULATION OF CELLULAR COMPONENT ORGANIZATION  | 40 | 7.73044  | 1.87151E-14 | 13.72780785 |
| GO RESPONSE TO OXYGEN LEVELS                               | 31 | 4.3405   | 2.3398E-14  | 13.63082126 |
| GO RESPONSE TO TOXIC SUBSTANCE                             | 35 | 5.80642  | 2.62557E-14 | 13.5807764  |
| GO MITOCHONDRION ORGANIZATION                              | 35 | 5.85223  | 3.18059E-14 | 13.49749231 |
| GO PROCESS UTILIZING AUTOPHAGIC MECHANISM                  | 34 | 5.47429  | 3.18059E-14 | 13.49749231 |
| GO REGULATION OF GROWTH                                    | 39 | 7.58155  | 5.3581E-14  | 13.27098919 |
| GO CELLULAR RESPONSE TO PEPTIDE                            | 30 | 4.18016  | 6.28238E-14 | 13.2018758  |
| GO PEPTIDE METABOLIC PROCESS                               | 19 | 1.20251  | 7.51537E-14 | 13.12404963 |
| GO NEURON APOPTOTIC PROCESS                                | 25 | 2.67988  | 9.06777E-14 | 13.0424995  |
| GO POSITIVE REGULATION OF GENE EXPRESSION                  | 66 | 22.0461  | 1.40773E-13 | 12.85148063 |
| GO RESPONSE TO IONIZING RADIATION                          | 21 | 1.69497  | 1.4397E-13  | 12.841728   |
| GO RESPONSE TO RADIATION                                   | 32 | 5.07346  | 1.65409E-13 | 12.78144086 |
| GO REGULATION OF TRANSPORT                                 | 63 | 20.4656  | 2.21128E-13 | 12.65535626 |
| GO CELLULAR SENESCENCE                                     | 16 | 0.755865 | 3.17479E-13 | 12.498285   |
| GO NEGATIVE REGULATION OF SIGNALING                        | 53 | 15.0371  | 4.09352E-13 | 12.38790308 |
| GO NEGATIVE REGULATION OF NEURON DEATH                     | 23 | 2.33631  | 4.69863E-13 | 12.32802875 |
| GO POSITIVE REGULATION OF MOLECULAR FUNCTION               | 61 | 19.7556  | 6.1172E-13  | 12.21344732 |
| GO NEGATIVE REGULATION OF BIOSYNTHETIC PROCESS             | 57 | 17.4765  | 6.734E-13   | 12.17172689 |
| GO POSITIVE REGULATION OF MULTICELLULAR ORGANISMAL PROCESS | 60 | 19.4005  | 1.01404E-12 | 11.99394491 |
| GO REGULATION OF CELLULAR COMPONENT BIOGENESIS             | 43 | 10.25    | 1.02383E-12 | 11.98977215 |
| GO CELLULAR RESPONSE TO DRUG                               | 28 | 4.01983  | 1.12515E-12 | 11.94878958 |
| GO REGULATION OF MITOCHONDRION ORGANIZATION                | 21 | 1.99273  | 2.28824E-12 | 11.64049843 |
| GO AMYLOID PRECURSOR PROTEIN CATABOLIC PROCESS             | 13 | 0.423742 | 2.63889E-12 | 11.57857871 |
| GO REGULATION OF KINASE ACTIVITY                           | 41 | 9.643    | 3.07644E-12 | 11.51195155 |
| GO REGULATION OF DNA METABOLIC PROCESS                     | 25 | 3.21815  | 3.53458E-12 | 11.45166218 |
| GO REGULATION OF PROTEOLYSIS                               | 37 | 7.89077  | 4.1371E-12  | 11.38330398 |
| GO AMYLOID PRECURSOR PROTEIN METABOLIC PROCESS             | 14 | 0.606982 | 6.28986E-12 | 11.20135902 |
| GO DOUBLE STRAND BREAK REPAIR                              | 23 | 2.71424  | 7.60665E-12 | 11.11880657 |
| GO REGULATION OF CELLULAR LOCALIZATION                     | 41 | 9.99803  | 9.15208E-12 | 11.03848019 |

|                                                                   |    |          |             |             |
|-------------------------------------------------------------------|----|----------|-------------|-------------|
| GO NEUROINFLAMMATORY RESPONSE                                     | 14 | 0.64134  | 1.16137E-11 | 10.9350294  |
| GO CELLULAR RESPONSE TO IONIZING RADIATION                        | 15 | 0.813127 | 1.18403E-11 | 10.92663729 |
| GO POSITIVE REGULATION OF ORGANELLE ORGANIZATION                  | 34 | 6.98602  | 1.86283E-11 | 10.72982678 |
| GO GLIAL CELL ACTIVATION                                          | 13 | 0.515362 | 1.91189E-11 | 10.7185371  |
| GO REGULATION OF CELL AGING                                       | 13 | 0.526815 | 2.39965E-11 | 10.6198521  |
| GO RESPONSE TO ORGANIC CYCLIC COMPOUND                            | 41 | 10.3645  | 2.66167E-11 | 10.57484579 |
| GO CELLULAR RESPONSE TO REACTIVE OXYGEN SPECIES                   | 19 | 1.77514  | 2.9689E-11  | 10.52740443 |
| GO REGULATION OF AUTOPHAGY                                        | 25 | 3.58463  | 2.9689E-11  | 10.52740443 |
| GO REGULATION OF CELLULAR PROTEIN LOCALIZATION                    | 31 | 5.88658  | 3.45592E-11 | 10.46143632 |
| GO REGULATION OF ORGANELLE ORGANIZATION                           | 48 | 14.1553  | 3.57014E-11 | 10.44731475 |
| GO POSITIVE REGULATION OF TRANSFERASE ACTIVITY                    | 34 | 7.28379  | 5.26443E-11 | 10.27864864 |
| GO NEGATIVE REGULATION OF MULTICELLULAR ORGANISMAL PROCESS        | 46 | 13.3651  | 7.52634E-11 | 10.12341617 |
| GO AMYLOID BETA FORMATION                                         | 11 | 0.32067  | 9.41395E-11 | 10.02622811 |
| GO REGULATION OF BINDING                                          | 26 | 4.18016  | 1.03213E-10 | 9.986265599 |
| GO POSITIVE REGULATION OF RNA BIOSYNTHETIC PROCESS                | 54 | 18.1866  | 1.29244E-10 | 9.888589609 |
| GO RESPONSE TO GAMMA RADIATION                                    | 13 | 0.629887 | 1.50748E-10 | 9.821748441 |
| GO POSITIVE REGULATION OF PROTEOLYSIS                             | 25 | 3.9053   | 1.60135E-10 | 9.795513736 |
| GO REGULATION OF PROTEIN LOCALIZATION                             | 41 | 11.086   | 1.91211E-10 | 9.718487127 |
| GO BEHAVIOR                                                       | 32 | 6.79133  | 2.09493E-10 | 9.678830484 |
| GO NEGATIVE REGULATION OF PHOSPHORYLATION                         | 27 | 4.7986   | 3.07884E-10 | 9.51161288  |
| GO INFLAMMATORY RESPONSE                                          | 34 | 7.87932  | 3.88262E-10 | 9.410875113 |
| GO ANATOMICAL STRUCTURE HOMEOSTASIS                               | 27 | 4.85586  | 3.91941E-10 | 9.406779304 |
| GO POSITIVE REGULATION OF CATALYTIC ACTIVITY                      | 49 | 15.8503  | 4.50353E-10 | 9.34644694  |
| GO CELLULAR HOMEOSTASIS                                           | 40 | 10.9257  | 4.82258E-10 | 9.316720559 |
| GO REGULATION OF PROTEIN STABILITY                                | 22 | 3.06927  | 4.82258E-10 | 9.316720559 |
| GO RESPONSE TO TEMPERATURE STIMULUS                               | 21 | 2.7486   | 5.00981E-10 | 9.300178745 |
| GO DNA BIOSYNTHETIC PROCESS                                       | 19 | 2.14162  | 5.17982E-10 | 9.285685332 |
| GO REGULATION OF NUCLEOBASE CONTAINING COMPOUND METABOLIC PROCESS | 29 | 5.76061  | 5.36396E-10 | 9.270514469 |
| GO REGULATION OF RESPONSE TO EXTERNAL STIMULUS                    | 35 | 8.56647  | 7.18023E-10 | 9.143861644 |
| GO LEUKOCYTE ACTIVATION INVOLVED IN INFLAMMATORY RESPONSE         | 11 | 0.423742 | 9.82923E-10 | 9.007480502 |
| GO REGULATION OF MAPK CASCADE                                     | 34 | 8.2687   | 1.26106E-09 | 8.89926425  |
| GO RESPONSE TO ANTIBIOTIC                                         | 23 | 3.60754  | 1.31742E-09 | 8.880275748 |
| GO POSITIVE REGULATION OF NEURON DEATH                            | 14 | 0.996367 | 1.62774E-09 | 8.788414964 |
| GO REGULATION OF DEVELOPMENTAL GROWTH                             | 23 | 3.6648   | 1.74681E-09 | 8.757754331 |
| GO PROTEOLYSIS                                                    | 54 | 19.6181  | 1.8914E-09  | 8.723216615 |
| GO REGULATION OF AMYLOID PRECURSOR PROTEIN CATABOLIC PROCESS      | 10 | 0.32067  | 1.97202E-09 | 8.705088685 |
| GO REGULATION OF PROTEIN COMPLEX ASSEMBLY                         | 26 | 4.85586  | 2.01236E-09 | 8.696294324 |
| GO POSITIVE REGULATION OF BINDING                                 | 18 | 2.0729   | 2.51479E-09 | 8.599498275 |
| GO RESPONSE TO HORMONE                                            | 39 | 11.0631  | 2.51479E-09 | 8.599498275 |
| GO REGULATION OF RESPONSE TO DNA DAMAGE STIMULUS                  | 19 | 2.38212  | 2.57379E-09 | 8.589426891 |
| GO RESPONSE TO HYDROGEN PEROXIDE                                  | 16 | 1.52318  | 2.58203E-09 | 8.588038716 |
| GO CELLULAR RESPONSE TO INORGANIC SUBSTANCE                       | 19 | 2.43938  | 3.70739E-09 | 8.430931726 |
| GO NEGATIVE REGULATION OF CELL POPULATION PROLIFERATION           | 32 | 7.68463  | 3.73485E-09 | 8.427726836 |
| GO CELLULAR RESPONSE TO RADIATION                                 | 18 | 2.14162  | 3.92678E-09 | 8.40596343  |
| GO REGULATION OF PROTEIN CATABOLIC PROCESS                        | 24 | 4.22597  | 3.92678E-09 | 8.40596343  |

|                                                                                 |    |          |             |             |
|---------------------------------------------------------------------------------|----|----------|-------------|-------------|
| GO DEVELOPMENTAL GROWTH                                                         | 31 | 7.24943  | 4.10584E-09 | 8.386597979 |
| GO RESPONSE TO X RAY                                                            | 10 | 0.355027 | 4.1499E-09  | 8.381962368 |
| GO POSITIVE REGULATION OF TRANSPORT                                             | 38 | 10.7997  | 4.69646E-09 | 8.328229372 |
| GO DNA RECOMBINATION                                                            | 21 | 3.18379  | 5.46688E-09 | 8.262260459 |
| GO POSITIVE REGULATION OF KINASE ACTIVITY                                       | 29 | 6.4363   | 5.72286E-09 | 8.242386878 |
| GO PROTEIN LOCALIZATION TO ORGANELLE                                            | 37 | 10.376   | 6.03154E-09 | 8.219571788 |
| GO POSITIVE REGULATION OF REACTIVE OXYGEN SPECIES METABOLIC PROCESS             | 11 | 0.526815 | 6.12658E-09 | 8.212781891 |
| GO NEGATIVE REGULATION OF DNA METABOLIC PROCESS                                 | 14 | 1.1338   | 6.56819E-09 | 8.182554293 |
| GO REGULATION OF RESPONSE TO OXIDATIVE STRESS                                   | 13 | 0.9162   | 6.98649E-09 | 8.155740958 |
| GO REGULATION OF AMYLOID BETA FORMATION                                         | 9  | 0.251955 | 7.06557E-09 | 8.150852797 |
| GO NEGATIVE REGULATION OF PROTEIN MODIFICATION PROCESS                          | 29 | 6.52792  | 7.54337E-09 | 8.12243459  |
| GO RESPONSE TO PEPTIDE HORMONE                                                  | 25 | 4.7986   | 7.66345E-09 | 8.115575672 |
| GO TELOMERE ORGANIZATION                                                        | 17 | 1.96983  | 8.88172E-09 | 8.051502922 |
| GO NEGATIVE REGULATION OF AMYLOID PRECURSOR PROTEIN CATABOLIC PROCESS           | 8  | 0.160335 | 1.07892E-08 | 7.967010756 |
| GO NEGATIVE REGULATION OF CATABOLIC PROCESS                                     | 21 | 3.33268  | 1.11605E-08 | 7.952316348 |
| GO RESPONSE TO HEAT                                                             | 17 | 2.00419  | 1.11605E-08 | 7.952316348 |
| GO POSITIVE REGULATION OF INTRACELLULAR SIGNAL TRANSDUCTION                     | 38 | 11.1891  | 1.14272E-08 | 7.942060171 |
| GO APOPTOTIC SIGNALING PATHWAY                                                  | 29 | 6.68826  | 1.24229E-08 | 7.905777011 |
| GO NEGATIVE REGULATION OF NUCLEOBASE CONTAINING COMPOUND METABOLIC PROCESS      | 16 | 1.74078  | 1.35193E-08 | 7.869045795 |
| GO REGULATION OF CHROMOSOME ORGANIZATION                                        | 22 | 3.77932  | 1.55197E-08 | 7.809116678 |
| GO REGULATION OF NERVOUS SYSTEM DEVELOPMENT                                     | 36 | 10.25    | 1.55197E-08 | 7.809116678 |
| GO REGULATION OF PROTEASOMAL PROTEIN CATABOLIC PROCESS                          | 17 | 2.06145  | 1.60745E-08 | 7.793862527 |
| GO CELLULAR RESPONSE TO HYDROGEN PEROXIDE                                       | 13 | 0.996367 | 1.61728E-08 | 7.791214784 |
| GO REGULATION OF CELL DIFFERENTIATION                                           | 53 | 20.4656  | 2.15232E-08 | 7.667093159 |
| GO REGULATION OF OXIDATIVE STRESS INDUCED INTRINSIC APOPTOTIC SIGNALING PATHWAY | 9  | 0.297765 | 2.15232E-08 | 7.667093159 |
| GO NEGATIVE REGULATION OF PHOSPHORUS METABOLIC PROCESS                          | 27 | 5.96675  | 2.27139E-08 | 7.643708291 |
| GO REGULATION OF CELLULAR PROTEIN CATABOLIC PROCESS                             | 19 | 2.7715   | 2.28146E-08 | 7.641787141 |
| GO POSITIVE REGULATION OF PROTEIN CATABOLIC PROCESS                             | 18 | 2.43938  | 2.31602E-08 | 7.635257695 |
| GO RESPONSE TO AMYLOID BETA                                                     | 10 | 0.446647 | 2.32114E-08 | 7.634298664 |
| GO MUSCLE CELL PROLIFERATION                                                    | 17 | 2.13016  | 2.4444E-08  | 7.611827725 |
| GO CELLULAR RESPONSE TO ANTIBIOTIC                                              | 15 | 1.54609  | 2.46428E-08 | 7.608309948 |
| GO PEPTIDYL AMINO ACID MODIFICATION                                             | 42 | 13.8804  | 2.87645E-08 | 7.541143171 |
| GO DNA GEOMETRIC CHANGE                                                         | 13 | 1.06508  | 3.19507E-08 | 7.495519623 |
| GO SIGNAL TRANSDUCTION BY PROTEIN PHOSPHORYLATION                               | 36 | 10.5707  | 3.2246E-08  | 7.49152415  |
| GO REGULATION OF CELLULAR AMIDE METABOLIC PROCESS                               | 23 | 4.3634   | 3.3042E-08  | 7.480933673 |
| GO CELLULAR RESPONSE TO ORGANIC CYCLIC COMPOUND                                 | 27 | 6.09273  | 3.3133E-08  | 7.47973924  |
| GO CELLULAR RESPONSE TO OXYGEN LEVELS                                           | 18 | 2.5081   | 3.32828E-08 | 7.477780145 |
| GO BASE EXCISION REPAIR                                                         | 10 | 0.469552 | 3.3443E-08  | 7.475694771 |
| GO RESPONSE TO ANTINEOPLASTIC AGENT                                             | 13 | 1.07653  | 3.46995E-08 | 7.459676783 |
| GO NEGATIVE REGULATION OF APOPTOTIC SIGNALING PATHWAY                           | 18 | 2.531    | 3.748E-08   | 7.426200418 |
| GO POSITIVE REGULATION OF CELLULAR PROTEIN LOCALIZATION                         | 21 | 3.61899  | 3.90876E-08 | 7.407960995 |
| GO POSITIVE REGULATION OF CELLULAR PROTEIN CATABOLIC PROCESS                    | 15 | 1.6148   | 4.02043E-08 | 7.395727495 |
| GO RESPONSE TO OXYGEN RADICAL                                                   | 9  | 0.332122 | 4.29197E-08 | 7.367343322 |
| GO NEGATIVE REGULATION OF MOLECULAR FUNCTION                                    | 39 | 12.4145  | 4.69601E-08 | 7.328270987 |
| GO REGULATION OF APOPTOTIC SIGNALING PATHWAY                                    | 23 | 4.46647  | 4.77093E-08 | 7.321396955 |

|                                                                            |    |          |             |             |
|----------------------------------------------------------------------------|----|----------|-------------|-------------|
| GO RESPONSE TO COPPER ION                                                  | 10 | 0.492457 | 4.77093E-08 | 7.321396955 |
| GO CELLULAR AMIDE METABOLIC PROCESS                                        | 36 | 10.7768  | 4.95394E-08 | 7.305049258 |
| GO REGULATION OF INFLAMMATORY RESPONSE                                     | 21 | 3.69916  | 5.46031E-08 | 7.2627827   |
| GO REGULATION OF OXIDATIVE STRESS INDUCED CELL DEATH                       | 11 | 0.68715  | 5.62406E-08 | 7.249950055 |
| GO CELL CELL SIGNALING                                                     | 49 | 18.576   | 5.98472E-08 | 7.222956164 |
| GO MUSCLE CELL MIGRATION                                                   | 12 | 0.904747 | 6.10455E-08 | 7.214346345 |
| GO RESPONSE TO LIPID                                                       | 35 | 10.3531  | 6.4411E-08  | 7.191039958 |
| GO RESPONSE TO METAL ION                                                   | 22 | 4.16871  | 7.31438E-08 | 7.135822481 |
| GO REGULATION OF CELL DEVELOPMENT                                          | 35 | 10.4103  | 7.33217E-08 | 7.134767474 |
| GO CARBOHYDRATE HOMEOSTASIS                                                | 18 | 2.66843  | 7.60662E-08 | 7.118808279 |
| GO ASTROCYTE ACTIVATION                                                    | 8  | 0.22905  | 7.60855E-08 | 7.118698101 |
| GO CELL CYCLE PROCESS                                                      | 43 | 15.1402  | 9.67067E-08 | 7.014543436 |
| GO NEGATIVE REGULATION OF CELLULAR CATABOLIC PROCESS                       | 18 | 2.71424  | 9.67067E-08 | 7.014543436 |
| GO NEGATIVE REGULATION OF ORGANELLE ORGANIZATION                           | 22 | 4.24888  | 9.91249E-08 | 7.003817238 |
| GO GLIAL CELL DEVELOPMENT                                                  | 13 | 1.21396  | 1.17764E-07 | 6.928987451 |
| GO REGULATION OF IMMUNE SYSTEM PROCESS                                     | 46 | 17.0986  | 1.18135E-07 | 6.927621414 |
| GO NEGATIVE REGULATION OF CELL DIFFERENTIATION                             | 30 | 7.99384  | 1.19478E-07 | 6.922712056 |
| GO NEGATIVE REGULATION OF INTRACELLULAR SIGNAL TRANSDUCTION                | 25 | 5.60027  | 1.19736E-07 | 6.921775254 |
| GO SMOOTH MUSCLE CELL MIGRATION                                            | 11 | 0.755865 | 1.26699E-07 | 6.897226813 |
| GO SUPEROXIDE METABOLIC PROCESS                                            | 11 | 0.755865 | 1.26699E-07 | 6.897226813 |
| GO NEGATIVE REGULATION OF MITOCHONDRION ORGANIZATION                       | 10 | 0.561172 | 1.29789E-07 | 6.886762114 |
| GO POSITIVE REGULATION OF DNA METABOLIC PROCESS                            | 15 | 1.79804  | 1.37934E-07 | 6.860328669 |
| GO CELLULAR RESPONSE TO PEPTIDE HORMONE STIMULUS                           | 20 | 3.53882  | 1.40045E-07 | 6.853732392 |
| GO REGULATION OF PROTEIN SERINE THREONINE KINASE ACTIVITY                  | 25 | 5.66899  | 1.47195E-07 | 6.832106942 |
| GO PROTEIN CONTAINING COMPLEX ASSEMBLY                                     | 52 | 21.1184  | 1.47216E-07 | 6.832044987 |
| GO REGULATION OF PEPTIDYL TYROSINE PHOSPHORYLATION                         | 18 | 2.80586  | 1.47968E-07 | 6.829832196 |
| GO SMOOTH MUSCLE CELL PROLIFERATION                                        | 14 | 1.52318  | 1.53845E-07 | 6.812916614 |
| GO POSITIVE REGULATION OF CELL DIFFERENTIATION                             | 35 | 10.7653  | 1.55184E-07 | 6.809153058 |
| GO REPLICATIVE SENESCENCE                                                  | 7  | 0.148882 | 1.68665E-07 | 6.772975029 |
| GO CHEMICAL HOMEOSTASIS                                                    | 39 | 13.0902  | 1.71341E-07 | 6.766138703 |
| GO REGULATION OF CELL CYCLE                                                | 39 | 13.2391  | 2.32003E-07 | 6.634506399 |
| GO POSITIVE REGULATION OF AUTOPHAGY                                        | 13 | 1.30558  | 2.42671E-07 | 6.61498212  |
| GO DEFENSE RESPONSE                                                        | 47 | 18.2324  | 2.61856E-07 | 6.581937471 |
| GO POSITIVE REGULATION OF MITOCHONDRION ORGANIZATION                       | 13 | 1.31704  | 2.64818E-07 | 6.577052499 |
| GO ASTROCYTE DEVELOPMENT                                                   | 9  | 0.435195 | 2.68135E-07 | 6.571646493 |
| GO REGULATION OF TRANS SYNAPTIC SIGNALING                                  | 23 | 4.95893  | 2.68135E-07 | 6.571646493 |
| GO MACROAUTOPHAGY                                                          | 19 | 3.30977  | 2.71114E-07 | 6.566848055 |
| GO REGULATION OF MACROAUTOPHAGY                                            | 15 | 1.91257  | 2.78815E-07 | 6.554683865 |
| GO PROTEIN COMPLEX OLIGOMERIZATION                                         | 26 | 6.36759  | 2.92249E-07 | 6.534246966 |
| GO TRANSMEMBRANE RECEPTOR PROTEIN TYROSINE KINASE SIGNALING PATHWAY        | 29 | 7.87932  | 3.17137E-07 | 6.498753086 |
| GO POSITIVE REGULATION OF NUCLEOBASE CONTAINING COMPOUND METABOLIC PROCESS | 17 | 2.61117  | 3.26492E-07 | 6.486127456 |
| GO REGULATION OF DNA REPAIR                                                | 13 | 1.35139  | 3.39334E-07 | 6.469372623 |
| GO POSITIVE REGULATION OF MAPK CASCADE                                     | 25 | 5.9553   | 3.48116E-07 | 6.458276015 |
| GO CIRCULATORY SYSTEM DEVELOPMENT                                          | 36 | 11.7274  | 3.53179E-07 | 6.452005127 |
| GO DNA CONFORMATION CHANGE                                                 | 19 | 3.38994  | 3.77984E-07 | 6.422526583 |

|                                                                                          |    |          |             |             |
|------------------------------------------------------------------------------------------|----|----------|-------------|-------------|
| GO CELLULAR GLUCOSE HOMEOSTASIS                                                          | 14 | 1.66061  | 3.92663E-07 | 6.40598002  |
| GO POSITIVE REGULATION OF CELL DEVELOPMENT                                               | 25 | 6.00111  | 3.95977E-07 | 6.402330039 |
| GO MUSCLE STRUCTURE DEVELOPMENT                                                          | 27 | 6.97457  | 4.04342E-07 | 6.393251145 |
| GO MACROMOLECULE DEACYLATION                                                             | 12 | 1.11089  | 4.07893E-07 | 6.389453748 |
| GO RESPONSE TO ACID CHEMICAL                                                             | 20 | 3.81368  | 4.12264E-07 | 6.384824587 |
| GO POSITIVE REGULATION OF PROTEOLYSIS INVOLVED IN CELLULAR PROTEIN CATABOLIC PROCESS     | 13 | 1.38575  | 4.30227E-07 | 6.366302338 |
| GO NEGATIVE REGULATION OF NEURON APOPTOTIC PROCESS                                       | 14 | 1.68352  | 4.49564E-07 | 6.347208473 |
| GO RELEASE OF CYTOCHROME C FROM MITOCHONDRIA                                             | 10 | 0.664245 | 4.71055E-07 | 6.326928382 |
| GO CELL DEATH IN RESPONSE TO OXIDATIVE STRESS                                            | 11 | 0.893295 | 5.21932E-07 | 6.282386075 |
| GO INTRINSIC APOPTOTIC SIGNALING PATHWAY IN RESPONSE TO OXIDATIVE STRESS                 | 9  | 0.481005 | 5.27208E-07 | 6.278018008 |
| GO STRESS INDUCED PREMATURE SENESCENCE                                                   | 6  | 0.09162  | 5.48528E-07 | 6.260801199 |
| GO RESPONSE TO LIGHT STIMULUS                                                            | 19 | 3.51592  | 6.27875E-07 | 6.202126809 |
| GO ENZYME LINKED RECEPTOR PROTEIN SIGNALING PATHWAY                                      | 35 | 11.4525  | 6.3043E-07  | 6.200363128 |
| GO OXIDATION REDUCTION PROCESS                                                           | 34 | 10.8913  | 6.38442E-07 | 6.194878551 |
| GO REGULATION OF ESTABLISHMENT OF PROTEIN LOCALIZATION                                   | 29 | 8.17708  | 6.43011E-07 | 6.191781598 |
| GO RECOMBINATIONAL REPAIR                                                                | 13 | 1.44301  | 6.44856E-07 | 6.190537255 |
| GO CELLULAR RESPONSE TO GAMMA RADIATION                                                  | 8  | 0.332122 | 6.76269E-07 | 6.16988052  |
| GO CELL GROWTH                                                                           | 23 | 5.26815  | 7.01861E-07 | 6.153748889 |
| GO TELOMERE MAINTENANCE VIA TELOMERE LENGTHENING                                         | 11 | 0.927652 | 7.13983E-07 | 6.146312129 |
| GO POSITIVE REGULATION OF PEPTIDYL TYROSINE PHOSPHORYLATION                              | 15 | 2.10726  | 8.37876E-07 | 6.076820249 |
| GO NEGATIVE REGULATION OF OXIDATIVE STRESS INDUCED INTRINSIC APOPTOTIC SIGNALING PATHWAY | 7  | 0.206145 | 8.41092E-07 | 6.075156498 |
| GO REGULATION OF INTRINSIC APOPTOTIC SIGNALING PATHWAY                                   | 14 | 1.78659  | 8.51191E-07 | 6.069972977 |
| GO TELOMERIC D LOOP DISASSEMBLY                                                          | 6  | 0.103072 | 8.60115E-07 | 6.065443478 |
| GO CELL CYCLE                                                                            | 49 | 20.3854  | 8.75956E-07 | 6.057517708 |
| GO REGULATION OF DEFENSE RESPONSE                                                        | 29 | 8.31451  | 8.793E-07   | 6.055862927 |
| GO CELLULAR RESPONSE TO HORMONE STIMULUS                                                 | 28 | 7.82206  | 9.45733E-07 | 6.024231457 |
| GO INTRINSIC APOPTOTIC SIGNALING PATHWAY                                                 | 18 | 3.2296   | 9.55525E-07 | 6.019757946 |
| GO MACROPHAGE ACTIVATION                                                                 | 11 | 0.96201  | 9.69663E-07 | 6.013379176 |
| GO REGULATION OF NEUROINFLAMMATORY RESPONSE                                              | 8  | 0.355027 | 1.00103E-06 | 5.999552907 |
| GO RESPONSE TO ACTIVITY                                                                  | 10 | 0.73296  | 1.00103E-06 | 5.999552907 |
| GO CHROMATIN ORGANIZATION                                                                | 30 | 8.91004  | 1.00499E-06 | 5.99783826  |
| GO MUSCLE ADAPTATION                                                                     | 12 | 1.23687  | 1.09134E-06 | 5.962039927 |
| GO POSITIVE REGULATION OF NERVOUS SYSTEM DEVELOPMENT                                     | 24 | 5.96675  | 1.38162E-06 | 5.859611389 |
| GO RESPONSE TO UV                                                                        | 13 | 1.55754  | 1.39115E-06 | 5.85662604  |
| GO MACROMOLECULE CATABOLIC PROCESS                                                       | 41 | 15.5181  | 1.40686E-06 | 5.851749118 |
| GO REGULATION OF MICROGLIAL CELL ACTIVATION                                              | 7  | 0.22905  | 1.43344E-06 | 5.843620481 |
| GO COGNITION                                                                             | 18 | 3.35558  | 1.60219E-06 | 5.795285983 |
| GO NEGATIVE REGULATION OF DEFENSE RESPONSE                                               | 15 | 2.23324  | 1.60952E-06 | 5.793303622 |
| GO MULTICELLULAR ORGANISM AGING                                                          | 8  | 0.389385 | 1.79932E-06 | 5.744891593 |
| GO RESPONSE TO KETONE                                                                    | 15 | 2.25614  | 1.81352E-06 | 5.741477651 |
| GO TELOMERIC LOOP DISASSEMBLY                                                            | 6  | 0.125977 | 1.94071E-06 | 5.712039356 |
| GO TOR SIGNALING                                                                         | 12 | 1.31704  | 1.99575E-06 | 5.699893862 |
| GO POSITIVE REGULATION OF CHROMOSOME ORGANIZATION                                        | 14 | 1.93547  | 2.00663E-06 | 5.697532699 |
| GO NEGATIVE REGULATION OF CATALYTIC ACTIVITY                                             | 29 | 8.68099  | 2.02649E-06 | 5.693255535 |
| GO REGULATION OF CELLULAR COMPONENT MOVEMENT                                             | 33 | 10.9142  | 2.02925E-06 | 5.692664445 |

|                                                                            |    |          |             |             |
|----------------------------------------------------------------------------|----|----------|-------------|-------------|
| GO SIGNAL TRANSDUCTION BY P53 CLASS MEDIATOR                               | 17 | 3.02346  | 2.04323E-06 | 5.689682743 |
| GO NEGATIVE REGULATION OF TELOMERE MAINTENANCE                             | 8  | 0.400837 | 2.11481E-06 | 5.674728645 |
| GO POSITIVE REGULATION OF PROTEIN BINDING                                  | 11 | 1.05363  | 2.11481E-06 | 5.674728645 |
| GO NEGATIVE REGULATION OF TRANSFERASE ACTIVITY                             | 17 | 3.04636  | 2.24187E-06 | 5.649389575 |
| GO POSITIVE REGULATION OF CELL POPULATION PROLIFERATION                    | 32 | 10.3989  | 2.24553E-06 | 5.648681138 |
| GO RNA DEPENDENT DNA BIOSYNTHETIC PROCESS                                  | 10 | 0.813127 | 2.24575E-06 | 5.648638592 |
| GO APOPTOTIC MITOCHONDRIAL CHANGES                                         | 12 | 1.33994  | 2.2915E-06  | 5.639880138 |
| GO REGULATION OF TRANSMEMBRANE TRANSPORT                                   | 24 | 6.16144  | 2.29373E-06 | 5.639457705 |
| GO AUTOPHAGY OF MITOCHONDRION                                              | 10 | 0.82458  | 2.50442E-06 | 5.601292837 |
| GO DNA REPLICATION                                                         | 17 | 3.09217  | 2.69276E-06 | 5.569802353 |
| GO CELLULAR RESPONSE TO X RAY                                              | 6  | 0.13743  | 2.72458E-06 | 5.564700436 |
| GO ORGANELLE DISASSEMBLY                                                   | 11 | 1.08799  | 2.76696E-06 | 5.557997119 |
| GO GLIAL CELL DIFFERENTIATION                                              | 15 | 2.34776  | 2.77873E-06 | 5.55615365  |
| GO REGULATION OF MITOCHONDRIAL FISSION                                     | 7  | 0.263407 | 2.92556E-06 | 5.533790991 |
| GO NEGATIVE REGULATION OF RNA BIOSYNTHETIC PROCESS                         | 38 | 14.1324  | 3.00952E-06 | 5.521502766 |
| GO POSITIVE REGULATION OF RESPONSE TO DNA DAMAGE STIMULUS                  | 11 | 1.09944  | 3.00952E-06 | 5.521502766 |
| GO REGULATION OF PROTEASOMAL UBIQUITIN DEPENDENT PROTEIN CATABOLIC PROCESS | 12 | 1.38575  | 3.11314E-06 | 5.506801348 |
| GO REGULATION OF INTRACELLULAR TRANSPORT                                   | 21 | 4.85586  | 3.20477E-06 | 5.494203133 |
| GO GLIOGENESIS                                                             | 17 | 3.14944  | 3.35364E-06 | 5.474483559 |
| GO ASTROCYTE DIFFERENTIATION                                               | 10 | 0.858937 | 3.41723E-06 | 5.46632579  |
| GO POSITIVE REGULATION OF CELL AGING                                       | 6  | 0.148882 | 3.80464E-06 | 5.41968643  |
| GO RESPONSE TO XENOBIOTIC STIMULUS                                         | 17 | 3.18379  | 3.85024E-06 | 5.414512198 |
| GO REGULATION OF SYNAPTIC PLASTICITY                                       | 14 | 2.0729   | 4.07976E-06 | 5.389365384 |
| GO NEGATIVE REGULATION OF CELL CYCLE                                       | 25 | 6.90586  | 4.28115E-06 | 5.368439555 |
| GO REGULATION OF ANATOMICAL STRUCTURE MORPHOGENESIS                        | 34 | 11.9221  | 4.36967E-06 | 5.35955136  |
| GO CELLULAR RESPONSE TO OXYGEN RADICAL                                     | 7  | 0.286312 | 4.54631E-06 | 5.342340954 |
| GO CELLULAR RESPONSE TO ABIOTIC STIMULUS                                   | 18 | 3.64189  | 4.58156E-06 | 5.338986622 |
| GO REGENERATION                                                            | 14 | 2.11871  | 5.16977E-06 | 5.286528778 |
| GO LYSOSOMAL TRANSPORT                                                     | 11 | 1.17961  | 5.56996E-06 | 5.254147924 |
| GO NEGATIVE REGULATION OF RESPONSE TO DNA DAMAGE STIMULUS                  | 10 | 0.9162   | 5.74237E-06 | 5.240908828 |
| GO PROTEIN REPAIR                                                          | 5  | 0.068715 | 6.03597E-06 | 5.219252927 |
| GO REGULATION OF DNA BIOSYNTHETIC PROCESS                                  | 11 | 1.19106  | 6.03597E-06 | 5.219252927 |
| GO SECRETION                                                               | 44 | 18.5416  | 6.93244E-06 | 5.159113881 |
| GO NEGATIVE REGULATION OF INFLAMMATORY RESPONSE                            | 12 | 1.51173  | 7.10471E-06 | 5.148453644 |
| GO REGULATION OF TELOMERE MAINTENANCE VIA TELOMERE LENGTHENING             | 9  | 0.698602 | 7.14149E-06 | 5.146211168 |
| GO POSITIVE REGULATION OF TRANSCRIPTION BY RNA POLYMERASE II               | 36 | 13.4567  | 7.62275E-06 | 5.117888323 |
| GO REGULATION OF PROTEIN OLIGOMERIZATION                                   | 8  | 0.492457 | 7.62275E-06 | 5.117888323 |
| GO PROTEIN LOCALIZATION TO CHROMOSOME                                      | 10 | 0.950557 | 7.66307E-06 | 5.115597207 |
| GO REGULATION OF SMALL MOLECULE METABOLIC PROCESS                          | 18 | 3.79078  | 0.000007786 | 5.108685601 |
| GO PROTEIN LOCALIZATION TO CHROMOSOME TELOMERIC REGION                     | 7  | 0.32067  | 0.000008414 | 5.074997492 |
| GO CELLULAR MACROMOLECULE CATABOLIC PROCESS                                | 35 | 12.9184  | 8.64686E-06 | 5.063141573 |
| GO REGULATION OF LIPID LOCALIZATION                                        | 12 | 1.54609  | 8.68436E-06 | 5.061262182 |
| GO NEGATIVE REGULATION OF RESPONSE TO OXIDATIVE STRESS                     | 8  | 0.50391  | 8.73074E-06 | 5.058948945 |
| GO POSITIVE REGULATION OF TRANSMEMBRANE TRANSPORT                          | 14 | 2.23324  | 9.01238E-06 | 5.045160505 |
| GO CENTRAL NERVOUS SYSTEM DEVELOPMENT                                      | 32 | 11.1433  | 9.06673E-06 | 5.042549317 |

|                                                                         |    |           |             |             |
|-------------------------------------------------------------------------|----|-----------|-------------|-------------|
| GO NEUROGENESIS                                                         | 43 | 18.0835   | 9.08024E-06 | 5.041902672 |
| GO PROTEIN HOMOOLOGOMERIZATION                                          | 18 | 3.84804   | 9.37981E-06 | 5.027805959 |
| GO MODULATION OF AGE RELATED BEHAVIORAL DECLINE                         | 5  | 0.0801675 | 9.70176E-06 | 5.013149473 |
| GO CELLULAR RESPONSE TO EXTRACELLULAR STIMULUS                          | 16 | 3.02346   | 9.87946E-06 | 5.005266793 |
| GO RESPONSE TO CORTICOSTEROID                                           | 13 | 1.90111   | 9.87946E-06 | 5.005266793 |
| GO MUSCLE CELL DIFFERENTIATION                                          | 18 | 3.87094   | 1.00705E-05 | 4.996948966 |
| GO RESPONSE TO INSULIN                                                  | 16 | 3.03491   | 1.02957E-05 | 4.987344121 |
| GO RESPONSE TO ALCOHOL                                                  | 15 | 2.64553   | 1.05338E-05 | 4.977414932 |
| GO MUSCLE TISSUE DEVELOPMENT                                            | 19 | 4.3405    | 1.08373E-05 | 4.965078904 |
| GO COVALENT CHROMATIN MODIFICATION                                      | 21 | 5.2796    | 1.08699E-05 | 4.963774451 |
| GO MUSCLE CELL APOPTOTIC PROCESS                                        | 9  | 0.744412  | 1.08972E-05 | 4.962685078 |
| GO REGULATION OF MEMBRANE POTENTIAL                                     | 20 | 4.8215    | 1.14209E-05 | 4.942299671 |
| GO POSITIVE REGULATION OF SYNAPTIC TRANSMISSION                         | 13 | 1.93547   | 0.000011691 | 4.932148339 |
| GO NEGATIVE REGULATION OF CHROMOSOME ORGANIZATION                       | 12 | 1.60335   | 1.18727E-05 | 4.925450506 |
| GO DETERMINATION OF ADULT LIFESPAN                                      | 6  | 0.194692  | 1.19732E-05 | 4.921789763 |
| GO REGULATION OF INTRACELLULAR PROTEIN TRANSPORT                        | 15 | 2.69134   | 1.26617E-05 | 4.897507981 |
| GO REGULATION OF RELEASE OF CYTOCHROME C FROM MITOCHONDRIA              | 8  | 0.538267  | 1.29127E-05 | 4.888982939 |
| GO CELLULAR CHEMICAL HOMEOSTASIS                                        | 28 | 9.04747   | 1.33501E-05 | 4.874515481 |
| GO NEGATIVE REGULATION OF CELLULAR AMIDE METABOLIC PROCESS              | 12 | 1.62625   | 1.34865E-05 | 4.870100743 |
| GO RESPONSE TO STEROID HORMONE                                          | 19 | 4.42066   | 1.37047E-05 | 4.863130467 |
| GO AMYLOID BETA CLEARANCE                                               | 7  | 0.355027  | 0.000014122 | 4.850103793 |
| GO CALMODULIN DEPENDENT KINASE SIGNALING PATHWAY                        | 5  | 0.09162   | 1.47153E-05 | 4.83223088  |
| GO REGULATION OF MITOCHONDRIAL MEMBRANE POTENTIAL                       | 9  | 0.77877   | 1.48815E-05 | 4.827353291 |
| GO CELL CYCLE ARREST                                                    | 15 | 2.73715   | 1.51671E-05 | 4.81909745  |
| GO GLUCOSE METABOLIC PROCESS                                            | 11 | 1.33994   | 1.60671E-05 | 4.794062503 |
| GO RESPONSE TO WOUNDING                                                 | 25 | 7.48993   | 1.61841E-05 | 4.790911447 |
| GO REGULATION OF MULTICELLULAR ORGANISM GROWTH                          | 9  | 0.790222  | 1.64584E-05 | 4.783612387 |
| GO REGULATION OF RESPONSE TO DRUG                                       | 10 | 1.05363   | 1.65508E-05 | 4.781181009 |
| GO REGULATION OF SUPEROXIDE METABOLIC PROCESS                           | 7  | 0.36648   | 1.66393E-05 | 4.778864948 |
| GO PEPTIDYL TYROSINE MODIFICATION                                       | 18 | 4.05418   | 1.79256E-05 | 4.746526299 |
| GO SYNAPTIC SIGNALING                                                   | 26 | 8.08546   | 1.80031E-05 | 4.744652706 |
| GO REGULATION OF UBIQUITIN DEPENDENT PROTEIN CATABOLIC PROCESS          | 12 | 1.68352   | 1.83647E-05 | 4.736016162 |
| GO REGULATION OF SIGNAL TRANSDUCTION BY P53 CLASS MEDIATOR              | 13 | 2.03854   | 1.92418E-05 | 4.715754304 |
| GO MITOCHONDRIAL FISSION                                                | 7  | 0.377932  | 1.93968E-05 | 4.712269912 |
| GO MULTICELLULAR ORGANISM GROWTH                                        | 12 | 1.69497   | 1.93968E-05 | 4.712269912 |
| GO NEGATIVE REGULATION OF DNA REPAIR                                    | 7  | 0.377932  | 1.93968E-05 | 4.712269912 |
| GO NEGATIVE REGULATION OF INTRINSIC APOPTOTIC SIGNALING PATHWAY         | 10 | 1.07653   | 1.93968E-05 | 4.712269912 |
| GO REGULATION OF OXIDOREDUCTASE ACTIVITY                                | 10 | 1.07653   | 1.93968E-05 | 4.712269912 |
| GO REGULATION OF RESPONSE TO REACTIVE OXYGEN SPECIES                    | 7  | 0.377932  | 1.93968E-05 | 4.712269912 |
| GO POSITIVE REGULATION OF UBIQUITIN DEPENDENT PROTEIN CATABOLIC PROCESS | 10 | 1.08799   | 2.10076E-05 | 4.67762356  |
| GO REGULATION OF PROTEIN BINDING                                        | 14 | 2.43938   | 2.18212E-05 | 4.66112137  |
| GO CELLULAR RESPONSE TO STARVATION                                      | 12 | 1.71787   | 2.18295E-05 | 4.660956212 |
| GO NEGATIVE REGULATION OF RESPONSE TO EXTERNAL STIMULUS                 | 17 | 3.67625   | 2.18295E-05 | 4.660956212 |
| GO REGULATION OF SYSTEM PROCESS                                         | 23 | 6.59664   | 2.32125E-05 | 4.634278083 |
| GO REGULATION OF NEUROTRANSMITTER LEVELS                                | 17 | 3.69916   | 2.35783E-05 | 4.627487511 |



|                                                                    |    |          |             |             |
|--------------------------------------------------------------------|----|----------|-------------|-------------|
| GO POSITIVE REGULATION OF NEURON APOPTOTIC PROCESS                 | 8  | 0.59553  | 2.37181E-05 | 4.624920104 |
| GO POSITIVE REGULATION OF AUTOPHAGY OF MITOCHONDRION               | 6  | 0.22905  | 2.41363E-05 | 4.617329305 |
| GO REGULATION OF GENE EXPRESSION EPIGENETIC                        | 17 | 3.71061  | 2.43607E-05 | 4.613310236 |
| GO MONOSACCHARIDE METABOLIC PROCESS                                | 12 | 1.74078  | 2.44486E-05 | 4.611746005 |
| GO ORGANONITROGEN COMPOUND CATABOLIC PROCESS                       | 36 | 14.2698  | 0.000025509 | 4.593306566 |
| GO REGULATION OF DNA BINDING                                       | 11 | 1.42011  | 2.55625E-05 | 4.592396675 |
| GO REGULATION OF DOUBLE STRAND BREAK REPAIR                        | 9  | 0.847485 | 0.000026274 | 4.580473804 |
| GO POSITIVE REGULATION OF PROTEIN SERINE THREONINE KINASE ACTIVITY | 17 | 3.74497  | 2.71533E-05 | 4.566177382 |
| GO RESPONSE TO STARVATION                                          | 13 | 2.14162  | 3.07299E-05 | 4.512438853 |
| GO NEGATIVE REGULATION OF DNA BIOSYNTHETIC PROCESS                 | 7  | 0.41229  | 3.11293E-05 | 4.506830645 |
| GO REGULATION OF MAP KINASE ACTIVITY                               | 17 | 3.79078  | 3.16416E-05 | 4.499741564 |
| GO ESTABLISHMENT OF PROTEIN LOCALIZATION TO ORGANELLE              | 22 | 6.21871  | 3.22639E-05 | 4.491283137 |
| GO NEGATIVE REGULATION OF PROTEOLYSIS                              | 17 | 3.81368  | 3.40805E-05 | 4.467494042 |
| GO ORGANELLE FISSION                                               | 20 | 5.24524  | 3.56626E-05 | 4.447786998 |
| GO RESPONSE TO CARBOHYDRATE                                        | 14 | 2.56536  | 3.66628E-05 | 4.43577437  |
| GO REGULATION OF MACROPHAGE ACTIVATION                             | 8  | 0.64134  | 3.78527E-05 | 4.421903137 |
| GO REGULATION OF TELOMERE MAINTENANCE                              | 9  | 0.893295 | 3.83535E-05 | 4.416194998 |
| GO REGULATION OF PEPTIDASE ACTIVITY                                | 19 | 4.78714  | 3.85199E-05 | 4.414314849 |
| GO CARBOHYDRATE METABOLIC PROCESS                                  | 22 | 6.29887  | 3.89042E-05 | 4.410003511 |
| GO NEGATIVE REGULATION OF LONG TERM SYNAPTIC POTENTIATION          | 5  | 0.125977 | 4.28298E-05 | 4.368253954 |
| GO REGULATION OF ASPARTIC TYPE PEPTIDASE ACTIVITY                  | 5  | 0.125977 | 4.28298E-05 | 4.368253954 |
| GO PROTEIN CATABOLIC PROCESS                                       | 29 | 10.2729  | 4.32886E-05 | 4.36362646  |
| GO REGULATION OF SYNAPSE STRUCTURE OR ACTIVITY                     | 14 | 2.61117  | 4.38249E-05 | 4.358279066 |
| GO INCLUSION BODY ASSEMBLY                                         | 6  | 0.263407 | 0.000045444 | 4.342523449 |
| GO REGULATION OF CHOLESTEROL EFFLUX                                | 6  | 0.263407 | 0.000045444 | 4.342523449 |
| GO REGULATION OF CARBOHYDRATE METABOLIC PROCESS                    | 13 | 2.23324  | 0.000045835 | 4.338802764 |
| GO CELLULAR MACROMOLECULE LOCALIZATION                             | 46 | 21.4734  | 4.62639E-05 | 4.334757759 |
| GO LIPID LOCALIZATION                                              | 18 | 4.39776  | 4.91068E-05 | 4.308858365 |
| GO CELLULAR RESPONSE TO HEAT                                       | 11 | 1.53463  | 4.91764E-05 | 4.308243267 |
| GO POSITIVE REGULATION OF CELLULAR COMPONENT BIOGENESIS            | 21 | 5.88658  | 4.96779E-05 | 4.303836771 |
| GO NEGATIVE REGULATION OF CELL AGING                               | 6  | 0.27486  | 5.53863E-05 | 4.256597646 |
| GO INSULIN RECEPTOR SIGNALING PATHWAY                              | 11 | 1.55754  | 5.57721E-05 | 4.253583003 |
| GO VACUOLAR TRANSPORT                                              | 11 | 1.55754  | 5.57721E-05 | 4.253583003 |
| GO POSITIVE REGULATION OF DEVELOPMENTAL GROWTH                     | 12 | 1.91257  | 5.75219E-05 | 4.240166777 |
| GO REGULATION OF MUSCLE ADAPTATION                                 | 9  | 0.950557 | 5.89734E-05 | 4.229343833 |
| GO CELLULAR DETOXIFICATION                                         | 10 | 1.24832  | 6.03476E-05 | 4.219339997 |
| GO POSITIVE REGULATION OF ESTABLISHMENT OF PROTEIN LOCALIZATION    | 19 | 4.95893  | 6.06917E-05 | 4.216870698 |
| GO RESPONSE TO ENDOPLASMIC RETICULUM STRESS                        | 15 | 3.11508  | 6.07686E-05 | 4.216320769 |
| GO REGULATION OF CELLULAR RESPONSE TO DRUG                         | 6  | 0.286312 | 6.66368E-05 | 4.176285867 |
| GO REGULATION OF PROTEIN LOCALIZATION TO NUCLEUS                   | 10 | 1.27123  | 6.96457E-05 | 4.157105692 |
| GO CELLULAR RESPONSE TO CARBOHYDRATE STIMULUS                      | 11 | 1.60335  | 7.12951E-05 | 4.146940317 |
| GO SMALL MOLECULE METABOLIC PROCESS                                | 42 | 19.057   | 7.32024E-05 | 4.13547468  |
| GO RHYTHMIC PROCESS                                                | 15 | 3.17234  | 7.44406E-05 | 4.128190135 |
| GO LONG TERM SYNAPTIC POTENTIATION                                 | 9  | 0.984915 | 7.54976E-05 | 4.122066854 |
| GO POSITIVE REGULATION OF CELLULAR AMIDE METABOLIC PROCESS         | 11 | 1.6148   | 7.54976E-05 | 4.122066854 |

|                                                                         |    |          |             |             |
|-------------------------------------------------------------------------|----|----------|-------------|-------------|
| GO NEGATIVE REGULATION OF TELOMERE MAINTENANCE VIA TELOMERE LENGTHENING | 6  | 0.297765 | 0.00007981  | 4.097942689 |
| GO POSITIVE REGULATION OF CELL CYCLE PROCESS                            | 15 | 3.19525  | 8.02187E-05 | 4.09572438  |
| GO PROTEIN KINASE B SIGNALING                                           | 14 | 2.7715   | 8.02187E-05 | 4.09572438  |
| GO REGULATION OF LONG TERM SYNAPTIC POTENTIATION                        | 7  | 0.492457 | 8.14187E-05 | 4.089275836 |
| GO IMPORT INTO CELL                                                     | 24 | 7.74189  | 8.37432E-05 | 4.077050448 |
| GO REGULATION OF CELLULAR CARBOHYDRATE METABOLIC PROCESS                | 10 | 1.30558  | 8.44014E-05 | 4.073650349 |
| GO REGULATION OF GENERATION OF PRECURSOR METABOLITES AND ENERGY         | 11 | 1.63771  | 8.44014E-05 | 4.073650349 |
| GO REGULATION OF GLIOGENESIS                                            | 10 | 1.30558  | 8.44014E-05 | 4.073650349 |
| GO NEGATIVE REGULATION OF INTRACELLULAR TRANSPORT                       | 8  | 0.73296  | 8.58212E-05 | 4.066405417 |
| GO REGULATION OF PROTEIN TYROSINE KINASE ACTIVITY                       | 9  | 1.00782  | 8.78301E-05 | 4.056356623 |
| GO MEMORY                                                               | 10 | 1.31704  | 9.01725E-05 | 4.04492589  |
| GO CELLULAR RESPONSE TO INSULIN STIMULUS                                | 13 | 2.40502  | 9.26077E-05 | 4.033352902 |
| GO NEGATIVE REGULATION OF REACTIVE OXYGEN SPECIES METABOLIC PROCESS     | 6  | 0.309217 | 9.37924E-05 | 4.027832351 |
| GO PROTEIN LOCALIZATION TO NUCLEUS                                      | 14 | 2.82877  | 9.80647E-05 | 4.008487296 |
| GO NEGATIVE REGULATION OF CELL DEVELOPMENT                              | 16 | 3.71061  | 9.91568E-05 | 4.003677497 |
| GO CELLULAR RESPONSE TO MANGANESE ION                                   | 5  | 0.160335 | 9.98878E-05 | 4.000487552 |
| GO REGULATION OF ATP BIOSYNTHETIC PROCESS                               | 5  | 0.160335 | 9.98878E-05 | 4.000487552 |
| GO REGULATION OF SIGNALING RECEPTOR ACTIVITY                            | 22 | 6.73407  | 0.00010055  | 3.997617925 |
| GO REGULATION OF NEURON DIFFERENTIATION                                 | 23 | 7.29524  | 0.000103246 | 3.986126765 |
| GO LIPID METABOLIC PROCESS                                              | 34 | 13.972   | 0.000104964 | 3.978959627 |
| GO MITOCHONDRIAL TRANSPORT                                              | 14 | 2.85167  | 0.000104964 | 3.978959627 |
| GO MYELOID LEUKOCYTE ACTIVATION                                         | 23 | 7.30669  | 0.000104964 | 3.978959627 |
| GO POSITIVE REGULATION OF PEPTIDASE ACTIVITY                            | 12 | 2.05     | 0.000104964 | 3.978959627 |
| GO CELLULAR RESPONSE TO LIPID                                           | 22 | 6.76843  | 0.000107358 | 3.969165588 |
| GO CELLULAR RESPONSE TO COPPER ION                                      | 6  | 0.32067  | 0.000109343 | 3.961209015 |
| GO REGULATION OF CELLULAR RESPIRATION                                   | 6  | 0.32067  | 0.000109343 | 3.961209015 |
| GO LOCOMOTION                                                           | 43 | 20.1335  | 0.00011077  | 3.955577844 |
| GO POSITIVE REGULATION OF MACROAUTOPHAGY                                | 8  | 0.767317 | 0.000112233 | 3.949879428 |
| GO CELL ACTIVATION                                                      | 36 | 15.3578  | 0.000114165 | 3.942467019 |
| GO AMYLOID FIBRIL FORMATION                                             | 5  | 0.171787 | 0.000127503 | 3.894479597 |
| GO FORMATION OF EXTRACHROMOSOMAL CIRCULAR DNA                           | 5  | 0.171787 | 0.000127503 | 3.894479597 |
| GO REGULATION OF LIPID METABOLIC PROCESS                                | 17 | 4.27178  | 0.000127503 | 3.894479597 |
| GO POSITIVE REGULATION OF GROWTH                                        | 14 | 2.90893  | 0.000127815 | 3.893418176 |
| GO CELLULAR RESPONSE TO EXTERNAL STIMULUS                               | 16 | 3.80223  | 0.000128017 | 3.892732354 |
| GO SIGNAL RELEASE                                                       | 19 | 5.26815  | 0.000128428 | 3.891340281 |
| GO POSITIVE REGULATION OF MAP KINASE ACTIVITY                           | 14 | 2.92039  | 0.00013257  | 3.877554744 |
| GO PROTEASOMAL PROTEIN CATABOLIC PROCESS                                | 19 | 5.29105  | 0.000135838 | 3.866978721 |
| GO CELL MOTILITY                                                        | 39 | 17.5681  | 0.000143628 | 3.842760887 |
| GO NEGATIVE REGULATION OF TRANSPORT                                     | 19 | 5.31396  | 0.000143628 | 3.842760887 |
| GO REGULATION OF HYDROLASE ACTIVITY                                     | 34 | 14.224   | 0.000146847 | 3.833134921 |
| GO POSITIVE REGULATION OF MUSCLE TISSUE DEVELOPMENT                     | 8  | 0.801675 | 0.000146995 | 3.832697437 |
| GO MITOTIC CELL CYCLE                                                   | 29 | 11.0517  | 0.000151265 | 3.820261548 |
| GO REGULATION OF CELL PROJECTION ORGANIZATION                           | 23 | 7.50139  | 0.000153044 | 3.815183692 |
| GO DETOXIFICATION                                                       | 10 | 1.42011  | 0.000156945 | 3.804252516 |
| GO POSITIVE REGULATION OF CHOLESTEROL EFFLUX                            | 5  | 0.18324  | 0.000160707 | 3.793965206 |

|                                                                                 |    |           |             |             |
|---------------------------------------------------------------------------------|----|-----------|-------------|-------------|
| GO STRIATED MUSCLE ADAPTATION                                                   | 7  | 0.561172  | 0.000161503 | 3.791819406 |
| GO POSITIVE REGULATION OF RESPONSE TO EXTERNAL STIMULUS                         | 15 | 3.43575   | 0.00016866  | 3.772987904 |
| GO MUSCLE ORGAN DEVELOPMENT                                                     | 17 | 4.38631   | 0.000172213 | 3.763934068 |
| GO POSITIVE REGULATION OF CELL CYCLE                                            | 17 | 4.38631   | 0.000172213 | 3.763934068 |
| GO SYNAPTIC TRANSMISSION DOPAMINERGIC                                           | 6  | 0.355027  | 0.000173839 | 3.759852785 |
| GO EPITHELIAL CELL APOPTOTIC PROCESS                                            | 9  | 1.12234   | 0.000181488 | 3.741152085 |
| GO POSITIVE REGULATION OF PROTEIN LOCALIZATION TO NUCLEUS                       | 8  | 0.836032  | 0.000191054 | 3.718843865 |
| GO POSITIVE REGULATION OF SMALL MOLECULE METABOLIC PROCESS                      | 9  | 1.1338    | 0.000194753 | 3.710515844 |
| GO REGULATION OF CIRCADIAN RHYTHM                                               | 9  | 1.1338    | 0.000194753 | 3.710515844 |
| GO VACUOLE ORGANIZATION                                                         | 11 | 1.82095   | 0.000197381 | 3.704694655 |
| GO POSITIVE REGULATION OF NEUROINFLAMMATORY RESPONSE                            | 5  | 0.194692  | 0.000201046 | 3.696704563 |
| GO PEPTIDYL SERINE MODIFICATION                                                 | 15 | 3.51592   | 0.000215021 | 3.667519123 |
| GO REGULATION OF MUSCLE SYSTEM PROCESS                                          | 13 | 2.63407   | 0.000215021 | 3.667519123 |
| GO POSITIVE REGULATION OF NEURON PROJECTION DEVELOPMENT                         | 14 | 3.06927   | 0.000217605 | 3.66233113  |
| GO NEGATIVE REGULATION OF EXTRINSIC APOPTOTIC SIGNALING PATHWAY                 | 9  | 1.1567    | 0.000223253 | 3.651202696 |
| GO REGULATION OF TRANSCRIPTION REGULATORY REGION DNA BINDING                    | 7  | 0.59553   | 0.000223253 | 3.651202696 |
| GO REGULATION OF EPITHELIAL CELL APOPTOTIC PROCESS                              | 8  | 0.858937  | 0.000224772 | 3.64825779  |
| GO CIRCULATORY SYSTEM PROCESS                                                   | 20 | 6.04692   | 0.000228504 | 3.641106193 |
| GO LOCOMOTORY BEHAVIOR                                                          | 12 | 2.24469   | 0.000230908 | 3.63656102  |
| GO NEGATIVE REGULATION OF MUSCLE CELL APOPTOTIC PROCESS                         | 6  | 0.377932  | 0.000231611 | 3.635240818 |
| GO POSITIVE REGULATION OF LOCOMOTION                                            | 20 | 6.05837   | 0.000233262 | 3.632156005 |
| GO SYNAPTIC VESICLE LOCALIZATION                                                | 11 | 1.86676   | 0.000240553 | 3.618789223 |
| GO NOTCH RECEPTOR PROCESSING LIGAND DEPENDENT                                   | 4  | 0.0801675 | 0.000242538 | 3.615220208 |
| GO ESTABLISHMENT OF PROTEIN LOCALIZATION TO TELOMERE                            | 5  | 0.206145  | 0.000246355 | 3.608438619 |
| GO NEGATIVE REGULATION OF CELLULAR SENESENCE                                    | 5  | 0.206145  | 0.000246355 | 3.608438619 |
| GO NEGATIVE REGULATION OF RELEASE OF CYTOCHROME C FROM MITOCHONDRIA             | 5  | 0.206145  | 0.000246355 | 3.608438619 |
| GO REACTIVE OXYGEN SPECIES BIOSYNTHETIC PROCESS                                 | 9  | 1.17961   | 0.00025297  | 3.596930979 |
| GO CELLULAR COMPONENT DISASSEMBLY                                               | 20 | 6.10418   | 0.000255937 | 3.591866925 |
| GO CYTOKINE PRODUCTION                                                          | 24 | 8.41759   | 0.000285582 | 3.544269169 |
| GO REGULATION OF LIPID TRANSPORT                                                | 9  | 1.20251   | 0.000290781 | 3.536433974 |
| GO NEGATIVE REGULATION OF KINASE ACTIVITY                                       | 13 | 2.72569   | 0.000293688 | 3.532113798 |
| GO REGULATION OF MUSCLE ORGAN DEVELOPMENT                                       | 10 | 1.54609   | 0.0002962   | 3.528414946 |
| GO POSITIVE REGULATION OF OXIDOREDUCTASE ACTIVITY                               | 7  | 0.629887  | 0.000301494 | 3.520721326 |
| GO NEGATIVE REGULATION OF TELOMERE MAINTENANCE VIA TELOMERASE                   | 5  | 0.217597  | 0.000303132 | 3.518368215 |
| GO CARDIOVASCULAR SYSTEM DEVELOPMENT                                            | 23 | 7.87932   | 0.000308418 | 3.510860283 |
| GO VESICLE MEDIATED TRANSPORT IN SYNAPSE                                        | 12 | 2.32486   | 0.000312399 | 3.505290365 |
| GO SYNAPSE ORGANIZATION                                                         | 17 | 4.62681   | 0.000315716 | 3.500703408 |
| GO IMMUNE SYSTEM DEVELOPMENT                                                    | 28 | 10.9257   | 0.000320249 | 3.494512218 |
| GO PROTEIN STABILIZATION                                                        | 11 | 1.93547   | 0.000321024 | 3.493462498 |
| GO REGULATION OF PROTEIN TARGETING                                              | 8  | 0.9162    | 0.000332269 | 3.478510176 |
| GO RESPONSE TO GROWTH FACTOR                                                    | 23 | 7.93658   | 0.0003413   | 3.466863712 |
| GO NEURON INTRINSIC APOPTOTIC SIGNALING PATHWAY IN RESPONSE TO OXIDATIVE STRESS | 4  | 0.09162   | 0.000343547 | 3.46401384  |
| GO PEPTIDYL LYSINE DEACETYLATION                                                | 4  | 0.09162   | 0.000343547 | 3.46401384  |
| GO REGULATION OF AMYLOID FIBRIL FORMATION                                       | 4  | 0.09162   | 0.000343547 | 3.46401384  |
| GO REGULATION OF ASTROCYTE ACTIVATION                                           | 4  | 0.09162   | 0.000343547 | 3.46401384  |

|                                                                                                               |    |          |             |             |
|---------------------------------------------------------------------------------------------------------------|----|----------|-------------|-------------|
| GO REGULATION OF NUCLEOTIDE BIOSYNTHETIC PROCESS                                                              | 6  | 0.41229  | 0.000343547 | 3.46401384  |
| GO REGULATION OF HISTONE MODIFICATION                                                                         | 10 | 1.58044  | 0.000344359 | 3.462988562 |
| GO RESPONSE TO ALKALOID                                                                                       | 9  | 1.23687  | 0.000346556 | 3.460226578 |
| GO POSITIVE REGULATION OF PROTEIN COMPLEX ASSEMBLY                                                            | 13 | 2.78296  | 0.000350065 | 3.455851308 |
| GO CELLULAR PROTEIN CATABOLIC PROCESS                                                                         | 24 | 8.56647  | 0.000361756 | 3.441584257 |
| GO REGULATION OF CELL CYCLE PROCESS                                                                           | 24 | 8.56647  | 0.000361756 | 3.441584257 |
| GO RESPONSE TO MITOCHONDRIAL DEPOLARISATION                                                                   | 5  | 0.22905  | 0.000361756 | 3.441584257 |
| GO TEMPERATURE HOMEOSTASIS                                                                                    | 11 | 1.96983  | 0.000365103 | 3.437584598 |
| GO NEGATIVE REGULATION OF CELLULAR PROTEIN LOCALIZATION                                                       | 9  | 1.24832  | 0.00036702  | 3.435310269 |
| GO EPITHELIAL CELL PROLIFERATION                                                                              | 16 | 4.21452  | 0.000387034 | 3.412250882 |
| GO ORGANONITROGEN COMPOUND BIOSYNTHETIC PROCESS                                                               | 41 | 19.8701  | 0.000388096 | 3.411060833 |
| GO REGULATION OF MUSCLE HYPERTROPHY                                                                           | 7  | 0.664245 | 0.000394711 | 3.40372077  |
| GO POSITIVE REGULATION OF CELL PROJECTION ORGANIZATION                                                        | 16 | 4.22597  | 0.000397404 | 3.400767766 |
| GO ACTIVATION OF PROTEIN KINASE ACTIVITY                                                                      | 15 | 3.75642  | 0.000417036 | 3.379826454 |
| GO EXTRACELLULAR STRUCTURE ORGANIZATION                                                                       | 17 | 4.76424  | 0.000434862 | 3.361648541 |
| GO RESPONSE TO MANGANESE ION                                                                                  | 5  | 0.240502 | 0.000435779 | 3.360733702 |
| GO HISTONE PHOSPHORYLATION                                                                                    | 6  | 0.435195 | 0.000437225 | 3.359295014 |
| GO RESPONSE TO CATECHOLAMINE                                                                                  | 6  | 0.435195 | 0.000437225 | 3.359295014 |
| GO NEGATIVE REGULATION OF ESTABLISHMENT OF PROTEIN LOCALIZATION                                               | 11 | 2.01564  | 0.000438428 | 3.358101718 |
| GO NEURON PROJECTION ORGANIZATION                                                                             | 8  | 0.96201  | 0.000440001 | 3.356546336 |
| GO REGULATION OF DNA BINDING TRANSCRIPTION FACTOR ACTIVITY                                                    | 17 | 4.77569  | 0.000442792 | 3.353800234 |
| GO REGULATION OF VESICLE MEDIATED TRANSPORT                                                                   | 19 | 5.85223  | 0.00046369  | 3.33377227  |
| GO DNA STRAND RENATURATION                                                                                    | 4  | 0.103072 | 0.000469649 | 3.328226598 |
| GO REGULATION OF ASPARTIC TYPE ENDOPEPTIDASE ACTIVITY INVOLVED IN AMYLOID PRECURSOR PROTEIN CATABOLIC PROCESS | 4  | 0.103072 | 0.000469649 | 3.328226598 |
| GO LYTIC VACUOLE ORGANIZATION                                                                                 | 7  | 0.68715  | 0.000471184 | 3.326809465 |
| GO POSITIVE REGULATION OF SMOOTH MUSCLE CELL PROLIFERATION                                                    | 8  | 0.973462 | 0.000471184 | 3.326809465 |
| GO REGULATION OF CHROMATIN ORGANIZATION                                                                       | 11 | 2.03854  | 0.000477227 | 3.321274993 |
| GO NEGATIVE REGULATION OF GROWTH                                                                              | 13 | 2.88603  | 0.000483372 | 3.31571851  |
| GO REGULATION OF AUTOPHAGY OF MITOCHONDRION                                                                   | 6  | 0.446647 | 0.000489077 | 3.31062276  |
| GO NEGATIVE REGULATION OF TRANSCRIPTION BY RNA POLYMERASE II                                                  | 25 | 9.36814  | 0.000496406 | 3.304162978 |
| GO POSITIVE REGULATION OF DNA BINDING                                                                         | 7  | 0.698602 | 0.00051354  | 3.289425723 |
| GO POSITIVE REGULATION OF STEROL TRANSPORT                                                                    | 5  | 0.251955 | 0.00051354  | 3.289425723 |
| GO REGULATION OF PROTEIN MODIFICATION BY SMALL PROTEIN CONJUGATION OR REMOVAL                                 | 12 | 2.47374  | 0.000519953 | 3.284035912 |
| GO MUSCLE HYPERTROPHY                                                                                         | 8  | 0.996367 | 0.000543095 | 3.265124196 |
| GO NEURON DIFFERENTIATION                                                                                     | 34 | 15.2776  | 0.00054356  | 3.26475251  |
| GO REGULATION OF SUPRAMOLECULAR FIBER ORGANIZATION                                                            | 15 | 3.85949  | 0.00054356  | 3.26475251  |
| GO MULTICELLULAR ORGANISMAL HOMEOSTASIS                                                                       | 18 | 5.39413  | 0.000544099 | 3.264322072 |
| GO REGULATION OF SECRETION                                                                                    | 24 | 8.87569  | 0.000600672 | 3.221362612 |
| GO POSITIVE REGULATION OF INTRACELLULAR PROTEIN TRANSPORT                                                     | 10 | 1.70642  | 0.00060147  | 3.220786029 |
| GO GLUCOSE IMPORT                                                                                             | 7  | 0.721507 | 0.000611048 | 3.213924673 |
| GO POSITIVE REGULATION OF CARBOHYDRATE METABOLIC PROCESS                                                      | 7  | 0.721507 | 0.000611048 | 3.213924673 |
| GO RESPONSE TO CADMIUM ION                                                                                    | 7  | 0.721507 | 0.000611048 | 3.213924673 |
| GO CHOLESTEROL EFFLUX                                                                                         | 6  | 0.469552 | 0.00061595  | 3.21045454  |
| GO NOTCH RECEPTOR PROCESSING                                                                                  | 4  | 0.114525 | 0.000627083 | 3.202674973 |
| GO DENDRITE DEVELOPMENT                                                                                       | 12 | 2.531    | 0.000630556 | 3.200276337 |

|                                                                       |    |          |             |             |
|-----------------------------------------------------------------------|----|----------|-------------|-------------|
| GO NEGATIVE REGULATION OF NERVOUS SYSTEM DEVELOPMENT                  | 14 | 3.43575  | 0.000630556 | 3.200276337 |
| GO REGULATION OF WNT SIGNALING PATHWAY                                | 15 | 3.92821  | 0.000648735 | 3.187932671 |
| GO TISSUE REGENERATION                                                | 7  | 0.73296  | 0.000663875 | 3.177913686 |
| GO POSITIVE REGULATION OF DNA RECOMBINATION                           | 6  | 0.481005 | 0.000688227 | 3.162268293 |
| GO RESPONSE TO DEXAMETHASONE                                          | 6  | 0.481005 | 0.000688227 | 3.162268293 |
| GO REGULATION OF MITOTIC CELL CYCLE                                   | 21 | 7.19217  | 0.000700238 | 3.154754325 |
| GO REGULATION OF NEURON PROJECTION DEVELOPMENT                        | 18 | 5.5201   | 0.000712281 | 3.14734864  |
| GO REGULATION OF CELL ACTIVATION                                      | 19 | 6.06982  | 0.000713961 | 3.146325511 |
| GO POSITIVE REGULATION OF DNA REPAIR                                  | 7  | 0.744412 | 0.000720267 | 3.142506483 |
| GO EXOCYTOSIS                                                         | 26 | 10.2385  | 0.00072301  | 3.140855696 |
| GO POSITIVE REGULATION OF GLUCOSE TRANSMEMBRANE TRANSPORT             | 6  | 0.492457 | 0.000766881 | 3.115272022 |
| GO PROTEIN DESTABILIZATION                                            | 6  | 0.492457 | 0.000766881 | 3.115272022 |
| GO LIPID STORAGE                                                      | 7  | 0.755865 | 0.000783264 | 3.106091834 |
| GO CELLULAR RESPONSE TO TOPOLOGICALLY INCORRECT PROTEIN               | 10 | 1.77514  | 0.00079966  | 3.097094627 |
| GO NEUROTRANSMITTER TRANSPORT                                         | 13 | 3.05782  | 0.000815261 | 3.088703333 |
| GO MITOCHONDRIAL DNA METABOLIC PROCESS                                | 4  | 0.125977 | 0.000818196 | 3.087142648 |
| GO NEGATIVE REGULATION OF TELOMERASE ACTIVITY                         | 4  | 0.125977 | 0.000818196 | 3.087142648 |
| GO POSITIVE REGULATION OF ATP BIOSYNTHETIC PROCESS                    | 4  | 0.125977 | 0.000818196 | 3.087142648 |
| GO REGULATION OF MULTI ORGANISM PROCESS                               | 16 | 4.53519  | 0.000831955 | 3.079900164 |
| GO DNA INTEGRITY CHECKPOINT                                           | 10 | 1.78659  | 0.00083343  | 3.079130871 |
| GO POSITIVE REGULATION OF GLIOGENESIS                                 | 7  | 0.767317 | 0.000844435 | 3.073433774 |
| GO CELLULAR RESPONSE TO KETONE                                        | 8  | 1.07653  | 0.000859411 | 3.065799092 |
| GO REGULATION OF CARBOHYDRATE BIOSYNTHETIC PROCESS                    | 8  | 1.07653  | 0.000859411 | 3.065799092 |
| GO RESPONSE TO TOPOLOGICALLY INCORRECT PROTEIN                        | 11 | 2.21033  | 0.000901075 | 3.045239059 |
| GO POSTTRANSCRIPTIONAL REGULATION OF GENE EXPRESSION                  | 20 | 6.76843  | 0.000919261 | 3.036561165 |
| GO CIRCADIAN RHYTHM                                                   | 11 | 2.22178  | 0.000937654 | 3.027957389 |
| GO NEGATIVE REGULATION OF SMOOTH MUSCLE CELL PROLIFERATION            | 6  | 0.515362 | 0.000937654 | 3.027957389 |
| GO PROTEIN ACETYLATION                                                | 11 | 2.22178  | 0.000937654 | 3.027957389 |
| GO REGULATION OF LIPID STORAGE                                        | 6  | 0.515362 | 0.000937654 | 3.027957389 |
| GO REGULATION OF STEROL TRANSPORT                                     | 6  | 0.515362 | 0.000937654 | 3.027957389 |
| GO SUPRAMOLECULAR FIBER ORGANIZATION                                  | 21 | 7.36396  | 0.000937654 | 3.027957389 |
| GO CELL DEATH IN RESPONSE TO HYDROGEN PEROXIDE                        | 5  | 0.297765 | 0.000955038 | 3.019979348 |
| GO NEGATIVE REGULATION OF RESPONSE TO DRUG                            | 5  | 0.297765 | 0.000955038 | 3.019979348 |
| GO POSITIVE REGULATION OF TRANSCRIPTION REGULATORY REGION DNA BINDING | 5  | 0.297765 | 0.000955038 | 3.019979348 |
| GO NON RECOMBINATIONAL REPAIR                                         | 8  | 1.09944  | 0.000969087 | 3.013637232 |
| GO NEGATIVE REGULATION OF SYNAPTIC TRANSMISSION                       | 7  | 0.790222 | 0.000978044 | 3.009641607 |
| GO REGULATION OF DENDRITIC SPINE DEVELOPMENT                          | 7  | 0.790222 | 0.000978044 | 3.009641607 |
| GO REGULATION OF CALCIUM MEDIATED SIGNALING                           | 8  | 1.11089  | 0.00103343  | 2.985718935 |
| GO DOPAMINE BIOSYNTHETIC PROCESS                                      | 4  | 0.13743  | 0.00103416  | 2.985412264 |
| GO MUSCLE ATROPHY                                                     | 4  | 0.13743  | 0.00103416  | 2.985412264 |
| GO NEGATIVE REGULATION OF BINDING                                     | 10 | 1.84385  | 0.00103416  | 2.985412264 |
| GO NEURON DEVELOPMENT                                                 | 29 | 12.4489  | 0.00103416  | 2.985412264 |
| GO POSITIVE REGULATION OF MICROGLIAL CELL ACTIVATION                  | 4  | 0.13743  | 0.00103416  | 2.985412264 |
| GO ENERGY DERIVATION BY OXIDATION OF ORGANIC COMPOUNDS                | 13 | 3.14944  | 0.00103956  | 2.98315044  |
| GO NEGATIVE REGULATION OF GENE EXPRESSION EPIGENETIC                  | 9  | 1.46592  | 0.00104978  | 2.978901705 |

|                                                                                         |    |          |            |             |
|-----------------------------------------------------------------------------------------|----|----------|------------|-------------|
| GO POSITIVE REGULATION OF CHROMATIN ORGANIZATION                                        | 8  | 1.12234  | 0.00109168 | 2.961904646 |
| GO ESTABLISHMENT OF PROTEIN LOCALIZATION TO CHROMOSOME                                  | 5  | 0.309217 | 0.00109629 | 2.960074547 |
| GO PROTEIN MATURATION                                                                   | 13 | 3.17234  | 0.00110949 | 2.954876608 |
| GO CELL SURFACE RECEPTOR SIGNALING PATHWAY INVOLVED IN CELL CELL SIGNALING              | 20 | 6.8944   | 0.00112774 | 2.947791015 |
| GO HISTONE DEACETYLATION                                                                | 7  | 0.813127 | 0.00112774 | 2.947791015 |
| GO REGULATION OF ESTABLISHMENT OF PROTEIN LOCALIZATION TO MITOCHONDRION                 | 7  | 0.813127 | 0.00112774 | 2.947791015 |
| GO REGULATION OF PROTEIN ACETYLATION                                                    | 7  | 0.813127 | 0.00112774 | 2.947791015 |
| GO SELECTIVE AUTOPHAGY                                                                  | 6  | 0.538267 | 0.00112774 | 2.947791015 |
| GO SIGNAL TRANSDUCTION IN RESPONSE TO DNA DAMAGE                                        | 9  | 1.48882  | 0.00115945 | 2.935747975 |
| GO ORGANIC HYDROXY COMPOUND TRANSPORT                                                   | 12 | 2.73715  | 0.00119431 | 2.922882931 |
| GO REGULATION OF ION TRANSMEMBRANE TRANSPORT                                            | 17 | 5.24524  | 0.00121156 | 2.916655073 |
| GO REGULATION OF DNA RECOMBINATION                                                      | 8  | 1.14525  | 0.00122648 | 2.911339529 |
| GO REGULATION OF TELOMERASE ACTIVITY                                                    | 6  | 0.54972  | 0.00124565 | 2.904603968 |
| GO NEGATIVE REGULATION OF MACROPHAGE DERIVED FOAM CELL DIFFERENTIATION                  | 4  | 0.148882 | 0.00130182 | 2.885449061 |
| GO POSITIVE REGULATION OF INSULIN LIKE GROWTH FACTOR RECEPTOR SIGNALING PATHWAY         | 4  | 0.148882 | 0.00130182 | 2.885449061 |
| GO LIPID OXIDATION                                                                      | 8  | 1.1567   | 0.00130203 | 2.885379009 |
| GO REGULATION OF GLUCOSE METABOLIC PROCESS                                              | 7  | 0.836032 | 0.00130794 | 2.883412178 |
| GO REGULATION OF GLUCOSE TRANSMEMBRANE TRANSPORT                                        | 7  | 0.836032 | 0.00130794 | 2.883412178 |
| GO REGULATION OF HORMONE LEVELS                                                         | 18 | 5.87513  | 0.00142118 | 2.847350913 |
| GO REGULATION OF PEPTIDE SECRETION                                                      | 17 | 5.32541  | 0.00143302 | 2.843747748 |
| GO POSITIVE REGULATION OF INTRACELLULAR TRANSPORT                                       | 11 | 2.35921  | 0.0014784  | 2.830208046 |
| GO PROTEIN LIPID COMPLEX SUBUNIT ORGANIZATION                                           | 6  | 0.572625 | 0.0015136  | 2.819988881 |
| GO PROTEIN PROCESSING                                                                   | 11 | 2.37067  | 0.00153654 | 2.813456129 |
| GO POSITIVE REGULATION OF INFLAMMATORY RESPONSE                                         | 9  | 1.55754  | 0.00157715 | 2.802127    |
| GO CHEMOKINE BIOSYNTHETIC PROCESS                                                       | 4  | 0.160335 | 0.00162323 | 2.789619939 |
| GO REGULATION OF AMYLOID BETA CLEARANCE                                                 | 4  | 0.160335 | 0.00162323 | 2.789619939 |
| GO REGULATION OF AUTOPHAGY OF MITOCHONDRION IN RESPONSE TO MITOCHONDRIAL DEPOLARIZATION | 4  | 0.160335 | 0.00162323 | 2.789619939 |
| GO RESPONSE TO LEUCINE                                                                  | 4  | 0.160335 | 0.00162323 | 2.789619939 |
| GO DNA DAMAGE RESPONSE SIGNAL TRANSDUCTION BY P53 CLASS MEDIATOR                        | 8  | 1.20251  | 0.00164824 | 2.78297955  |
| GO REGULATION OF CELL CYCLE ARREST                                                      | 8  | 1.20251  | 0.00164824 | 2.78297955  |
| GO BLOOD VESSEL MORPHOGENESIS                                                           | 19 | 6.52792  | 0.00165289 | 2.781756048 |
| GO CELLULAR RESPONSE TO STEROID HORMONE STIMULUS                                        | 12 | 2.85167  | 0.00168367 | 2.773743026 |
| GO INTERACTION WITH SYMBIONT                                                            | 7  | 0.881842 | 0.00174778 | 2.757513235 |
| GO NEGATIVE REGULATION OF AUTOPHAGY                                                     | 7  | 0.881842 | 0.00174778 | 2.757513235 |
| GO INTRACELLULAR TRANSPORT                                                              | 40 | 20.6832  | 0.00176553 | 2.753124898 |
| GO FAT CELL DIFFERENTIATION                                                             | 11 | 2.41648  | 0.00177419 | 2.750999873 |
| GO REGULATION OF ASTROCYTE DIFFERENTIATION                                              | 5  | 0.355027 | 0.00186515 | 2.729286235 |
| GO CELL CYCLE PHASE TRANSITION                                                          | 19 | 6.60809  | 0.0019138  | 2.71810345  |
| GO CALCIUM MEDIATED SIGNALING                                                           | 11 | 2.45083  | 0.00197661 | 2.704079012 |
| GO CELL CYCLE CHECKPOINT                                                                | 11 | 2.45083  | 0.00197661 | 2.704079012 |
| GO INTERSTRAND CROSS LINK REPAIR                                                        | 6  | 0.606982 | 0.00197661 | 2.704079012 |
| GO MITOCHONDRIAL TRANSCRIPTION                                                          | 4  | 0.171787 | 0.00197661 | 2.704079012 |
| GO POSITIVE REGULATION OF AMYLOID PRECURSOR PROTEIN CATABOLIC PROCESS                   | 4  | 0.171787 | 0.00197661 | 2.704079012 |
| GO POSITIVE REGULATION OF GLUCONEOGENESIS                                               | 4  | 0.171787 | 0.00197661 | 2.704079012 |
| GO POSITIVE REGULATION OF MITOCHONDRIAL FISSION                                         | 4  | 0.171787 | 0.00197661 | 2.704079012 |

|                                                                                                 |    |           |            |             |
|-------------------------------------------------------------------------------------------------|----|-----------|------------|-------------|
| GO PROTEIN LOCALIZATION TO MITOCHONDRION                                                        | 9  | 1.6148    | 0.00197661 | 2.704079012 |
| GO REGULATION OF NEUROTRANSMITTER TRANSPORT                                                     | 9  | 1.6148    | 0.00197661 | 2.704079012 |
| GO TUMOR NECROSIS FACTOR SUPERFAMILY CYTOKINE PRODUCTION                                        | 9  | 1.6148    | 0.00197661 | 2.704079012 |
| GO INTERLEUKIN 1 BETA PRODUCTION                                                                | 7  | 0.904747  | 0.00198214 | 2.702865674 |
| GO PEPTIDYL LYSINE MODIFICATION                                                                 | 15 | 4.40921   | 0.00198214 | 2.702865674 |
| GO DEVELOPMENTAL CELL GROWTH                                                                    | 11 | 2.46229   | 0.00203536 | 2.691358765 |
| GO REGULATION OF DENDRITE DEVELOPMENT                                                           | 9  | 1.62625   | 0.00206824 | 2.684399067 |
| GO FATTY ACID METABOLIC PROCESS                                                                 | 12 | 2.93184   | 0.00210053 | 2.677671111 |
| GO TELOMERE CAPPING                                                                             | 6  | 0.618435  | 0.00213344 | 2.670919567 |
| GO MYELOID CELL HOMEOSTASIS                                                                     | 9  | 1.63771   | 0.00216332 | 2.664879235 |
| GO REPRODUCTION                                                                                 | 34 | 16.5374   | 0.00216332 | 2.664879235 |
| GO PEPTIDE SECRETION                                                                            | 19 | 6.69971   | 0.00221646 | 2.654340102 |
| GO ION HOMEOSTASIS                                                                              | 23 | 9.13909   | 0.00221676 | 2.654281324 |
| GO CARBOHYDRATE TRANSMEMBRANE TRANSPORT                                                         | 8  | 1.27123   | 0.00227485 | 2.643047235 |
| GO NEGATIVE REGULATION OF CELL GROWTH                                                           | 10 | 2.06145   | 0.00228127 | 2.641823311 |
| GO ENDOCYTOSIS                                                                                  | 18 | 6.13854   | 0.00228882 | 2.64038836  |
| GO MUSCLE SYSTEM PROCESS                                                                        | 16 | 5.01619   | 0.00228882 | 2.64038836  |
| GO NEGATIVE REGULATION OF HYDROLASE ACTIVITY                                                    | 16 | 5.01619   | 0.00228882 | 2.64038836  |
| GO POSITIVE REGULATION OF PROTEIN TYROSINE KINASE ACTIVITY                                      | 6  | 0.629887  | 0.00230738 | 2.636880876 |
| GO EATING BEHAVIOR                                                                              | 5  | 0.377932  | 0.00232791 | 2.633033814 |
| GO SUPEROXIDE ANION GENERATION                                                                  | 5  | 0.377932  | 0.00232791 | 2.633033814 |
| GO CHAPERONE MEDIATED AUTOPHAGY                                                                 | 4  | 0.18324   | 0.00235699 | 2.62764226  |
| GO NEGATIVE REGULATION OF CELLULAR RESPONSE TO DRUG                                             | 4  | 0.18324   | 0.00235699 | 2.62764226  |
| GO POSITIVE REGULATION OF ASTROCYTE DIFFERENTIATION                                             | 4  | 0.18324   | 0.00235699 | 2.62764226  |
| GO REGULATION OF BROWN FAT CELL DIFFERENTIATION                                                 | 4  | 0.18324   | 0.00235699 | 2.62764226  |
| GO REGULATION OF TRANSPORTER ACTIVITY                                                           | 12 | 2.97765   | 0.00235699 | 2.62764226  |
| GO CHEMOKINE PRODUCTION                                                                         | 7  | 0.939105  | 0.0023824  | 2.62298532  |
| GO REGULATION OF RESPONSE TO ENDOPLASMIC RETICULUM STRESS                                       | 7  | 0.939105  | 0.0023824  | 2.62298532  |
| GO REGULATION OF IMMUNE RESPONSE                                                                | 26 | 11.1433   | 0.00239791 | 2.620167121 |
| GO DNA DEPENDENT DNA REPLICATION                                                                | 9  | 1.67206   | 0.00244356 | 2.611976993 |
| GO STEROID METABOLIC PROCESS                                                                    | 13 | 3.48156   | 0.00245509 | 2.609932583 |
| GO RECEPTOR METABOLIC PROCESS                                                                   | 10 | 2.09581   | 0.00253302 | 2.596361381 |
| GO REGULATION OF REACTIVE OXYGEN SPECIES BIOSYNTHETIC PROCESS                                   | 7  | 0.950557  | 0.0025392  | 2.595303091 |
| GO STRIATED MUSCLE CELL DIFFERENTIATION                                                         | 12 | 3.01201   | 0.00258141 | 2.588143012 |
| GO NEGATIVE REGULATION OF OXIDATIVE STRESS INDUCED NEURON INTRINSIC APOPTOTIC SIGNALING PATHWAY | 3  | 0.0572625 | 0.00263491 | 2.579234214 |
| GO POSITIVE REGULATION OF ASTROCYTE ACTIVATION                                                  | 3  | 0.0572625 | 0.00263491 | 2.579234214 |
| GO POSITIVE REGULATION OF MAPKKK CASCADE BY FIBROBLAST GROWTH FACTOR RECEPTOR SIGNALING PATHWAY | 3  | 0.0572625 | 0.00263491 | 2.579234214 |
| GO REGULATION OF INTERLEUKIN 1 BIOSYNTHETIC PROCESS                                             | 3  | 0.0572625 | 0.00263491 | 2.579234214 |
| GO REGULATION OF SPONTANEOUS SYNAPTIC TRANSMISSION                                              | 3  | 0.0572625 | 0.00263491 | 2.579234214 |
| GO RESPONSE TO CAMPTOTHECIN                                                                     | 3  | 0.0572625 | 0.00263491 | 2.579234214 |
| GO RESPONSE TO FLUORIDE                                                                         | 3  | 0.0572625 | 0.00263491 | 2.579234214 |
| GO GENERATION OF PRECURSOR METABOLITES AND ENERGY                                               | 17 | 5.65753   | 0.00264497 | 2.577579249 |
| GO REGULATION OF MUSCLE CELL DIFFERENTIATION                                                    | 9  | 1.69497   | 0.00264497 | 2.577579249 |
| GO CHROMOSOME SEGREGATION                                                                       | 13 | 3.52737   | 0.00273088 | 2.563697383 |
| GO ORGANIC CYCLIC COMPOUND CATABOLIC PROCESS                                                    | 19 | 6.83714   | 0.00273088 | 2.563697383 |

|                                                                         |    |          |            |             |
|-------------------------------------------------------------------------|----|----------|------------|-------------|
| GO POSITIVE REGULATION OF IMMUNE SYSTEM PROCESS                         | 27 | 11.9335  | 0.00278134 | 2.555745918 |
| GO NEGATIVE REGULATION OF PROTEIN OLIGOMERIZATION                       | 4  | 0.194692 | 0.00278674 | 2.554903549 |
| GO POSITIVE REGULATION OF SUPEROXIDE ANION GENERATION                   | 4  | 0.194692 | 0.00278674 | 2.554903549 |
| GO REVERSE CHOLESTEROL TRANSPORT                                        | 4  | 0.194692 | 0.00278674 | 2.554903549 |
| GO CELLULAR RESPIRATION                                                 | 10 | 2.13016  | 0.00280317 | 2.552350563 |
| GO CELLULAR LIPID METABOLIC PROCESS                                     | 24 | 9.97513  | 0.00283431 | 2.547552651 |
| GO REGULATION OF SYNAPTIC VESICLE TRANSPORT                             | 7  | 0.973462 | 0.00283431 | 2.547552651 |
| GO SECONDARY ALCOHOL METABOLIC PROCESS                                  | 7  | 0.973462 | 0.00283431 | 2.547552651 |
| GO ACTIVATION OF MAPK ACTIVITY                                          | 9  | 1.71787  | 0.00286815 | 2.542398139 |
| GO POSITIVE REGULATION OF NEURON DIFFERENTIATION                        | 14 | 4.06564  | 0.00287624 | 2.541174878 |
| GO LEUKOCYTE DIFFERENTIATION                                            | 17 | 5.7148   | 0.00291786 | 2.53493555  |
| GO REGULATION OF VASCULATURE DEVELOPMENT                                | 13 | 3.56173  | 0.00294192 | 2.531369141 |
| GO REGULATION OF PLASMA LIPOPROTEIN PARTICLE LEVELS                     | 7  | 0.984915 | 0.00301353 | 2.520924481 |
| GO CELL CELL SIGNALING BY WNT                                           | 17 | 5.74915  | 0.00310248 | 2.508291009 |
| GO MEMBRANE PROTEIN PROTEOLYSIS                                         | 6  | 0.675697 | 0.00310248 | 2.508291009 |
| GO NEGATIVE REGULATION OF RNA CATABOLIC PROCESS                         | 6  | 0.675697 | 0.00310248 | 2.508291009 |
| GO TUBE DEVELOPMENT                                                     | 26 | 11.3609  | 0.00310248 | 2.508291009 |
| GO POSITIVE REGULATION OF MITOTIC CELL CYCLE                            | 9  | 1.74078  | 0.00311088 | 2.507116741 |
| GO REGULATION OF EXTRINSIC APOPTOTIC SIGNALING PATHWAY                  | 9  | 1.74078  | 0.00311088 | 2.507116741 |
| GO POSITIVE REGULATION OF SMOOTH MUSCLE CELL MIGRATION                  | 5  | 0.41229  | 0.0031641  | 2.499749799 |
| GO MEMBRANE PROTEIN INTRACELLULAR DOMAIN PROTEOLYSIS                    | 4  | 0.206145 | 0.00328756 | 2.483126312 |
| GO POSITIVE REGULATION OF RESPONSE TO OXIDATIVE STRESS                  | 4  | 0.206145 | 0.00328756 | 2.483126312 |
| GO POSITIVE REGULATION OF LIPID TRANSPORT                               | 6  | 0.68715  | 0.00334604 | 2.475468872 |
| GO CHROMATIN ORGANIZATION INVOLVED IN REGULATION OF TRANSCRIPTION       | 8  | 1.3743   | 0.0034988  | 2.456080882 |
| GO REGULATION OF ION TRANSPORT                                          | 20 | 7.60446  | 0.00352583 | 2.452738631 |
| GO TRANSMEMBRANE TRANSPORT                                              | 35 | 17.7972  | 0.00360934 | 2.442572205 |
| GO CHROMOSOME SEPARATION                                                | 7  | 1.01927  | 0.00360996 | 2.44249761  |
| GO CANONICAL WNT SIGNALING PATHWAY                                      | 13 | 3.65335  | 0.00366213 | 2.436266243 |
| GO REGULATION OF CATION TRANSMEMBRANE TRANSPORT                         | 13 | 3.65335  | 0.00366213 | 2.436266243 |
| GO REGULATION OF FAT CELL DIFFERENTIATION                               | 8  | 1.38575  | 0.00366244 | 2.436229481 |
| GO INTERLEUKIN 1 BIOSYNTHETIC PROCESS                                   | 3  | 0.068715 | 0.00371719 | 2.42978524  |
| GO REGULATION OF MITOCHONDRIAL ATP SYNTHESIS COUPLED ELECTRON TRANSPORT | 3  | 0.068715 | 0.00371719 | 2.42978524  |
| GO REGULATION OF ENDOCYTOSIS                                            | 10 | 2.22178  | 0.00374658 | 2.42636499  |
| GO DEVELOPMENTAL MATURATION                                             | 12 | 3.17234  | 0.00385711 | 2.413737975 |
| GO MAINTENANCE OF LOCATION                                              | 13 | 3.67625  | 0.00385711 | 2.413737975 |
| GO NEGATIVE REGULATION OF LIPID STORAGE                                 | 4  | 0.217597 | 0.0038658  | 2.412760618 |
| GO MONOCARBOXYLIC ACID METABOLIC PROCESS                                | 16 | 5.31396  | 0.00397135 | 2.401061836 |
| GO DENDRITIC SPINE DEVELOPMENT                                          | 7  | 1.04218  | 0.00404082 | 2.393530495 |
| GO REGULATION OF ORGAN GROWTH                                           | 7  | 1.04218  | 0.00404082 | 2.393530495 |
| GO MYELOID LEUKOCYTE DIFFERENTIATION                                    | 10 | 2.25614  | 0.00418198 | 2.378618048 |
| GO PROTEIN ACYLATION                                                    | 11 | 2.72569  | 0.00427753 | 2.368806936 |
| GO INTERLEUKIN 1 PRODUCTION                                             | 7  | 1.05363  | 0.00428873 | 2.367671294 |
| GO NEGATIVE REGULATION OF EPITHELIAL CELL APOPTOTIC PROCESS             | 5  | 0.446647 | 0.0043159  | 2.364928627 |
| GO NERVOUS SYSTEM PROCESS                                               | 32 | 15.8388  | 0.00444427 | 2.352199565 |
| GO CATECHOLAMINE BIOSYNTHETIC PROCESS                                   | 4  | 0.22905  | 0.00452067 | 2.344797194 |



|                                                                                        |    |           |            |             |
|----------------------------------------------------------------------------------------|----|-----------|------------|-------------|
| GO MITOTIC G2 DNA DAMAGE CHECKPOINT                                                    | 4  | 0.22905   | 0.00452067 | 2.344797194 |
| GO REGULATION OF NEUROTRANSMITTER UPTAKE                                               | 4  | 0.22905   | 0.00452067 | 2.344797194 |
| GO REGULATION OF PROTEIN HOMOOLOGOMERIZATION                                           | 4  | 0.22905   | 0.00452067 | 2.344797194 |
| GO STEROL TRANSPORT                                                                    | 7  | 1.06508   | 0.00452302 | 2.344571492 |
| GO POSITIVE REGULATION OF SUPRAMOLECULAR FIBER ORGANIZATION                            | 10 | 2.2905    | 0.0046387  | 2.333603714 |
| GO ANATOMICAL STRUCTURE MATURATION                                                     | 9  | 1.8553    | 0.0047011  | 2.327800511 |
| GO BROWN FAT CELL DIFFERENTIATION                                                      | 5  | 0.4581    | 0.00473091 | 2.325055314 |
| GO POSITIVE REGULATION OF GLIAL CELL DIFFERENTIATION                                   | 5  | 0.4581    | 0.00473091 | 2.325055314 |
| GO REGULATION OF PROTEIN DEACETYLATION                                                 | 5  | 0.4581    | 0.00473091 | 2.325055314 |
| GO REGULATION OF VACUOLE ORGANIZATION                                                  | 5  | 0.4581    | 0.00473091 | 2.325055314 |
| GO IMMUNE EFFECTOR PROCESS                                                             | 28 | 13.1246   | 0.00496806 | 2.303813168 |
| GO ORGANIC HYDROXY COMPOUND METABOLIC PROCESS                                          | 16 | 5.43994   | 0.00500129 | 2.300917962 |
| GO AMYLOID BETA CLEARANCE BY CELLULAR CATABOLIC PROCESS                                | 3  | 0.0801675 | 0.00505302 | 2.296448983 |
| GO LATE ENDOSOME TO LYSOSOME TRANSPORT                                                 | 3  | 0.0801675 | 0.00505302 | 2.296448983 |
| GO POSITIVE REGULATION OF CELLULAR RESPIRATION                                         | 3  | 0.0801675 | 0.00505302 | 2.296448983 |
| GO POSITIVE REGULATION OF PROTEIN MODIFICATION BY SMALL PROTEIN CONJUGATION OR REMOVAL | 8  | 1.46592   | 0.00505302 | 2.296448983 |
| GO SPONTANEOUS SYNAPTIC TRANSMISSION                                                   | 3  | 0.0801675 | 0.00505302 | 2.296448983 |
| GO LEUKOCYTE PROLIFERATION                                                             | 12 | 3.28687   | 0.00509378 | 2.292959816 |
| GO HOMEOSTASIS OF NUMBER OF CELLS                                                      | 11 | 2.79441   | 0.00510179 | 2.292277422 |
| GO REGULATION OF GLIAL CELL DIFFERENTIATION                                            | 6  | 0.755865  | 0.00512591 | 2.290229023 |
| GO INFLAMMATORY CELL APOPTOTIC PROCESS                                                 | 4  | 0.240502  | 0.00513288 | 2.289638889 |
| GO MITOCHONDRIAL GENOME MAINTENANCE                                                    | 4  | 0.240502  | 0.00513288 | 2.289638889 |
| GO MITOPHAGY                                                                           | 4  | 0.240502  | 0.00513288 | 2.289638889 |
| GO NEGATIVE REGULATION OF INTRACELLULAR PROTEIN TRANSPORT                              | 5  | 0.469552  | 0.00513288 | 2.289638889 |
| GO NEGATIVE REGULATION OF STRIATED MUSCLE CELL APOPTOTIC PROCESS                       | 4  | 0.240502  | 0.00513288 | 2.289638889 |
| GO NEUROTRANSMITTER UPTAKE                                                             | 5  | 0.469552  | 0.00513288 | 2.289638889 |
| GO POSITIVE REGULATION OF NUCLEOTIDE BIOSYNTHETIC PROCESS                              | 4  | 0.240502  | 0.00513288 | 2.289638889 |
| GO REGULATION OF SUPEROXIDE ANION GENERATION                                           | 4  | 0.240502  | 0.00513288 | 2.289638889 |
| GO RESPONSE TO ELECTRICAL STIMULUS                                                     | 5  | 0.469552  | 0.00513288 | 2.289638889 |
| GO RESPONSE TO HYPEROXIA                                                               | 4  | 0.240502  | 0.00513288 | 2.289638889 |
| GO RESPONSE TO SALT STRESS                                                             | 4  | 0.240502  | 0.00513288 | 2.289638889 |
| GO CELLULAR RESPONSE TO ACID CHEMICAL                                                  | 10 | 2.33631   | 0.00521258 | 2.282947267 |
| GO STEROL METABOLIC PROCESS                                                            | 7  | 1.09944   | 0.00522842 | 2.281629533 |
| GO NEGATIVE REGULATION OF PROTEIN COMPLEX ASSEMBLY                                     | 8  | 1.48882   | 0.00546029 | 2.262784291 |
| GO MEMBRANE PROTEIN ECTODOMAIN PROTEOLYSIS                                             | 5  | 0.481005  | 0.00562865 | 2.249595756 |
| GO RESPONSE TO TESTOSTERONE                                                            | 5  | 0.481005  | 0.00562865 | 2.249595756 |
| GO NEGATIVE REGULATION OF LIPID METABOLIC PROCESS                                      | 6  | 0.77877   | 0.0058291  | 2.234398494 |
| GO REGULATION OF POSTSYNAPSE ORGANIZATION                                              | 7  | 1.12234   | 0.00585334 | 2.232596249 |
| GO INTERLEUKIN 6 BIOSYNTHETIC PROCESS                                                  | 4  | 0.251955  | 0.00594047 | 2.226179193 |
| GO NEGATIVE REGULATION OF SMOOTH MUSCLE CELL MIGRATION                                 | 4  | 0.251955  | 0.00594047 | 2.226179193 |
| GO HEART DEVELOPMENT                                                                   | 17 | 6.13854   | 0.00600124 | 2.221759005 |
| GO REGULATION OF PROTEIN TARGETING TO MITOCHONDRION                                    | 5  | 0.492457  | 0.00617611 | 2.209284978 |
| GO POSITIVE REGULATION OF DENDRITE DEVELOPMENT                                         | 6  | 0.790222  | 0.00622683 | 2.205732991 |
| GO SIGNAL RELEASE FROM SYNAPSE                                                         | 9  | 1.94692   | 0.00628557 | 2.201655333 |
| GO SKELETAL MUSCLE ORGAN DEVELOPMENT                                                   | 9  | 1.94692   | 0.00628557 | 2.201655333 |

|                                                                                  |    |          |            |             |
|----------------------------------------------------------------------------------|----|----------|------------|-------------|
| GO PROTEIN TARGETING TO MITOCHONDRION                                            | 7  | 1.14525  | 0.00650975 | 2.18643569  |
| GO POSITIVE REGULATION OF LIPID METABOLIC PROCESS                                | 8  | 1.53463  | 0.00652834 | 2.185197235 |
| GO NEGATIVE REGULATION OF ESTABLISHMENT OF PROTEIN LOCALIZATION TO MITOCHONDRION | 3  | 0.09162  | 0.00657216 | 2.182291872 |
| GO POSITIVE REGULATION OF ASPARTIC TYPE PEPTIDASE ACTIVITY                       | 3  | 0.09162  | 0.00657216 | 2.182291872 |
| GO POSITIVE REGULATION OF OXIDATIVE PHOSPHORYLATION                              | 3  | 0.09162  | 0.00657216 | 2.182291872 |
| GO POSITIVE REGULATION OF RESPONSE TO REACTIVE OXYGEN SPECIES                    | 3  | 0.09162  | 0.00657216 | 2.182291872 |
| GO WOUND HEALING                                                                 | 17 | 6.1958   | 0.00657216 | 2.182291872 |
| GO SMALL MOLECULE BIOSYNTHETIC PROCESS                                           | 19 | 7.42122  | 0.00662499 | 2.178814773 |
| GO ATP BIOSYNTHETIC PROCESS                                                      | 5  | 0.50391  | 0.00669071 | 2.174527794 |
| GO GLIAL CELL PROLIFERATION                                                      | 5  | 0.50391  | 0.00669071 | 2.174527794 |
| GO REGULATION OF DOUBLE STRAND BREAK REPAIR VIA HOMOLOGOUS RECOMBINATION         | 5  | 0.50391  | 0.00669071 | 2.174527794 |
| GO REGULATION OF INSULIN LIKE GROWTH FACTOR RECEPTOR SIGNALING PATHWAY           | 4  | 0.263407 | 0.00675021 | 2.170682716 |
| GO TUMOR NECROSIS FACTOR BIOSYNTHETIC PROCESS                                    | 4  | 0.263407 | 0.00675021 | 2.170682716 |
| GO REGULATION OF ANATOMICAL STRUCTURE SIZE                                       | 16 | 5.63463  | 0.00689164 | 2.161677417 |
| GO NEGATIVE REGULATION OF FAT CELL DIFFERENTIATION                               | 5  | 0.515362 | 0.0073185  | 2.135577923 |
| GO REGULATION OF GLUCONEOGENESIS                                                 | 5  | 0.515362 | 0.0073185  | 2.135577923 |
| GO ENDOTHELIAL CELL PROLIFERATION                                                | 8  | 1.56899  | 0.00738261 | 2.131790073 |
| GO CELLULAR CARBOHYDRATE METABOLIC PROCESS                                       | 11 | 2.94329  | 0.00739597 | 2.131004859 |
| GO LEUKOCYTE MEDIATED IMMUNITY                                                   | 21 | 8.77261  | 0.00742081 | 2.129548688 |
| GO CELL PROJECTION ORGANIZATION                                                  | 33 | 17.1329  | 0.00750649 | 2.12456309  |
| GO INTRINSIC APOPTOTIC SIGNALING PATHWAY IN RESPONSE TO DNA DAMAGE               | 7  | 1.17961  | 0.00752155 | 2.123692653 |
| GO MODULATION BY HOST OF VIRAL PROCESS                                           | 4  | 0.27486  | 0.00768577 | 2.114312616 |
| GO RESPONSE TO MUSCLE ACTIVITY                                                   | 4  | 0.27486  | 0.00768577 | 2.114312616 |
| GO SMOOTH MUSCLE CELL APOPTOTIC PROCESS                                          | 4  | 0.27486  | 0.00768577 | 2.114312616 |
| GO VESICLE LOCALIZATION                                                          | 12 | 3.47011  | 0.00768577 | 2.114312616 |
| GO RESPONSE TO NUTRIENT                                                          | 10 | 2.47374  | 0.00768752 | 2.114213741 |
| GO NEGATIVE REGULATION OF CYTOKINE PRODUCTION                                    | 11 | 2.9662   | 0.00779172 | 2.108366662 |
| GO ANATOMICAL STRUCTURE FORMATION INVOLVED IN MORPHOGENESIS                      | 26 | 12.174   | 0.00783375 | 2.106030292 |
| GO POSITIVE REGULATION OF TRANSPORTER ACTIVITY                                   | 7  | 1.20251  | 0.00830521 | 2.080649382 |
| GO REGULATION OF NUCLEOCYTOPLASMIC TRANSPORT                                     | 7  | 1.20251  | 0.00830521 | 2.080649382 |
| GO POSITIVE REGULATION OF VASCULATURE DEVELOPMENT                                | 9  | 2.03854  | 0.00835377 | 2.078117486 |
| GO HYPEROSMOTIC SALINITY RESPONSE                                                | 3  | 0.103072 | 0.00836687 | 2.077436979 |
| GO MITOCHONDRIAL FRAGMENTATION INVOLVED IN APOPTOTIC PROCESS                     | 3  | 0.103072 | 0.00836687 | 2.077436979 |
| GO SINGLE STRAND BREAK REPAIR                                                    | 3  | 0.103072 | 0.00836687 | 2.077436979 |
| GO SKIN MORPHOGENESIS                                                            | 3  | 0.103072 | 0.00836687 | 2.077436979 |
| GO UBIQUITIN RECYCLING                                                           | 3  | 0.103072 | 0.00836687 | 2.077436979 |
| GO MYELOID CELL DIFFERENTIATION                                                  | 14 | 4.6039   | 0.008475   | 2.071860293 |
| GO NEGATIVE REGULATION OF TOR SIGNALING                                          | 5  | 0.538267 | 0.00856978 | 2.067030327 |
| GO REGULATION OF PROTEIN LOCALIZATION TO MEMBRANE                                | 9  | 2.05     | 0.00860154 | 2.065423787 |
| GO EXTRINSIC APOPTOTIC SIGNALING PATHWAY                                         | 10 | 2.51955  | 0.00863208 | 2.063884543 |
| GO NEGATIVE REGULATION OF NEURON DIFFERENTIATION                                 | 10 | 2.51955  | 0.00863208 | 2.063884543 |
| GO POSITIVE REGULATION OF PROTEIN OLIGOMERIZATION                                | 4  | 0.286312 | 0.00863208 | 2.063884543 |
| GO REGULATION OF DNA REPLICATION                                                 | 7  | 1.21396  | 0.00863208 | 2.063884543 |
| GO REGULATION OF NEUROTRANSMITTER SECRETION                                      | 7  | 1.21396  | 0.00863208 | 2.063884543 |
| GO REGULATION OF OXIDATIVE PHOSPHORYLATION                                       | 4  | 0.286312 | 0.00863208 | 2.063884543 |

|                                                                                   |    |          |            |             |
|-----------------------------------------------------------------------------------|----|----------|------------|-------------|
| GO REGULATION OF LIPID BIOSYNTHETIC PROCESS                                       | 9  | 2.06145  | 0.00886625 | 2.052260027 |
| GO CARBOHYDRATE TRANSPORT                                                         | 8  | 1.62625  | 0.0089309  | 2.049104773 |
| GO CARDIOCYTE DIFFERENTIATION                                                     | 8  | 1.62625  | 0.0089309  | 2.049104773 |
| GO REGULATION OF FATTY ACID METABOLIC PROCESS                                     | 5  | 0.54972  | 0.00924797 | 2.033953588 |
| GO POSITIVE REGULATION OF LIPID BIOSYNTHETIC PROCESS                              | 6  | 0.87039  | 0.00948604 | 2.022915048 |
| GO ADULT BEHAVIOR                                                                 | 8  | 1.64916  | 0.00972828 | 2.011963938 |
| GO NEURON DEATH IN RESPONSE TO OXIDATIVE STRESS                                   | 4  | 0.297765 | 0.00974449 | 2.011240886 |
| GO POSITIVE REGULATION OF BEHAVIOR                                                | 4  | 0.297765 | 0.00974449 | 2.011240886 |
| GO POSITIVE REGULATION OF RESPONSE TO DRUG                                        | 4  | 0.297765 | 0.00974449 | 2.011240886 |
| GO POSITIVE REGULATION OF SECRETION                                               | 14 | 4.68407  | 0.00980154 | 2.008705683 |
| GO DNA MODIFICATION                                                               | 7  | 1.24832  | 0.00994812 | 2.002258985 |
| GO NUCLEOTIDE EXCISION REPAIR                                                     | 7  | 1.24832  | 0.00994812 | 2.002258985 |
| GO ANIMAL ORGAN REGENERATION                                                      | 6  | 0.881842 | 0.010018   | 1.999218973 |
| GO CELLULAR RESPONSE TO UV                                                        | 6  | 0.881842 | 0.010018   | 1.999218973 |
| GO REGULATION OF LEUKOCYTE MIGRATION                                              | 9  | 2.10726  | 0.010162   | 1.993020809 |
| GO POSITIVE REGULATION OF PEPTIDE SECRETION                                       | 11 | 3.08072  | 0.0101737  | 1.992521073 |
| GO CELLULAR RESPONSE TO POTASSIUM ION                                             | 3  | 0.114525 | 0.0103172  | 1.986438151 |
| GO CYTOKINE METABOLIC PROCESS                                                     | 7  | 1.25977  | 0.0103172  | 1.986438151 |
| GO INFLAMMATORY RESPONSE TO WOUNDING                                              | 3  | 0.114525 | 0.0103172  | 1.986438151 |
| GO NEGATIVE REGULATION OF MUSCLE ADAPTATION                                       | 3  | 0.114525 | 0.0103172  | 1.986438151 |
| GO NEGATIVE REGULATION OF PROTEIN HOMOOLIGOMERIZATION                             | 3  | 0.114525 | 0.0103172  | 1.986438151 |
| GO NEURON PROJECTION MAINTENANCE                                                  | 3  | 0.114525 | 0.0103172  | 1.986438151 |
| GO POSITIVE REGULATION OF CHEMOKINE BIOSYNTHETIC PROCESS                          | 3  | 0.114525 | 0.0103172  | 1.986438151 |
| GO POSITIVE REGULATION OF DOUBLE STRAND BREAK REPAIR VIA HOMOLOGOUS RECOMBINATION | 3  | 0.114525 | 0.0103172  | 1.986438151 |
| GO POSITIVE REGULATION OF MITOPHAGY                                               | 3  | 0.114525 | 0.0103172  | 1.986438151 |
| GO REGULATION OF REMOVAL OF SUPEROXIDE RADICALS                                   | 3  | 0.114525 | 0.0103172  | 1.986438151 |
| GO STRIATED MUSCLE ATROPHY                                                        | 3  | 0.114525 | 0.0103172  | 1.986438151 |
| GO CELLULAR RESPONSE TO BIOTIC STIMULUS                                           | 10 | 2.59972  | 0.0105746  | 1.975736051 |
| GO REGULATION OF VASCULAR SMOOTH MUSCLE CELL PROLIFERATION                        | 5  | 0.572625 | 0.0106628  | 1.972128737 |
| GO RNA STABILIZATION                                                              | 5  | 0.572625 | 0.0106628  | 1.972128737 |
| GO NEGATIVE REGULATION OF MUSCLE HYPERTROPHY                                      | 4  | 0.309217 | 0.0107832  | 1.96725234  |
| GO RESPONSE TO AMINO ACID                                                         | 7  | 1.27123  | 0.0107832  | 1.96725234  |
| GO REGULATION OF CELLULAR RESPONSE TO HEAT                                        | 6  | 0.904747 | 0.0111329  | 1.953391692 |
| GO POSITIVE REGULATION OF ION TRANSMEMBRANE TRANSPORT                             | 8  | 1.69497  | 0.011191   | 1.951131104 |
| GO ENDOMEMBRANE SYSTEM ORGANIZATION                                               | 14 | 4.76424  | 0.0112021  | 1.950700555 |
| GO REGULATION OF UBIQUITIN PROTEIN TRANSFERASE ACTIVITY                           | 5  | 0.584077 | 0.0115182  | 1.938615385 |
| GO POSITIVE REGULATION OF LIPID LOCALIZATION                                      | 6  | 0.9162   | 0.0117856  | 1.928648303 |
| GO PROTEIN LOCALIZATION TO SYNAPSE                                                | 6  | 0.9162   | 0.0117856  | 1.928648303 |
| GO CARDIAC MUSCLE CELL DIFFERENTIATION                                            | 7  | 1.29413  | 0.0118251  | 1.927195178 |
| GO RESPONSE TO CYTOKINE                                                           | 27 | 13.2849  | 0.0118575  | 1.926006867 |
| GO CELL MORPHOGENESIS INVOLVED IN NEURON DIFFERENTIATION                          | 17 | 6.59664  | 0.0119917  | 1.921119245 |
| GO ADAPTIVE THERMOGENESIS                                                         | 8  | 1.71787  | 0.011999   | 1.920854947 |
| GO POSITIVE REGULATION OF HYDROLASE ACTIVITY                                      | 20 | 8.50921  | 0.011999   | 1.920854947 |
| GO POSITIVE REGULATION OF MACROPHAGE ACTIVATION                                   | 4  | 0.32067  | 0.011999   | 1.920854947 |
| GO POSITIVE REGULATION OF MONOOXYGENASE ACTIVITY                                  | 4  | 0.32067  | 0.011999   | 1.920854947 |

|                                                                                                |    |          |           |             |
|------------------------------------------------------------------------------------------------|----|----------|-----------|-------------|
| GO RESPONSE TO INCREASED OXYGEN LEVELS                                                         | 4  | 0.32067  | 0.011999  | 1.920854947 |
| GO SKELETAL MUSCLE ADAPTATION                                                                  | 4  | 0.32067  | 0.011999  | 1.920854947 |
| GO LIPID MODIFICATION                                                                          | 10 | 2.65698  | 0.0121651 | 1.914884317 |
| GO CELLULAR KETONE METABOLIC PROCESS                                                           | 9  | 2.17597  | 0.0121938 | 1.913860932 |
| GO REGULATION OF STEROID METABOLIC PROCESS                                                     | 7  | 1.30558  | 0.0122717 | 1.91109527  |
| GO DNA SYNTHESIS INVOLVED IN DNA REPAIR                                                        | 5  | 0.59553  | 0.0122903 | 1.910437516 |
| GO CATECHOLAMINE UPTAKE INVOLVED IN SYNAPTIC TRANSMISSION                                      | 3  | 0.125977 | 0.0125225 | 1.90230896  |
| GO POSITIVE REGULATION OF AMYLOID BETA FORMATION                                               | 3  | 0.125977 | 0.0125225 | 1.90230896  |
| GO PROGRAMMED CELL DEATH IN RESPONSE TO REACTIVE OXYGEN SPECIES                                | 3  | 0.125977 | 0.0125225 | 1.90230896  |
| GO REGULATION OF DENDRITIC SPINE MAINTENANCE                                                   | 3  | 0.125977 | 0.0125225 | 1.90230896  |
| GO REGULATION OF DNA CATABOLIC PROCESS                                                         | 3  | 0.125977 | 0.0125225 | 1.90230896  |
| GO REGULATION OF TRANSCRIPTION FROM RNA POLYMERASE II PROMOTER IN RESPONSE TO OXIDATIVE STRESS | 3  | 0.125977 | 0.0125225 | 1.90230896  |
| GO SYNAPTIC VESICLE CYCLE                                                                      | 9  | 2.18743  | 0.0125225 | 1.90230896  |
| GO TUBULIN DEACETYLATION                                                                       | 3  | 0.125977 | 0.0125225 | 1.90230896  |
| GO VIRAL LATENCY                                                                               | 3  | 0.125977 | 0.0125225 | 1.90230896  |
| GO NEGATIVE REGULATION OF CELL CYCLE PROCESS                                                   | 12 | 3.73351  | 0.0131047 | 1.882572917 |
| GO REGULATION OF MACROPHAGE DERIVED FOAM CELL DIFFERENTIATION                                  | 4  | 0.332122 | 0.0132984 | 1.876200608 |
| GO ERYTHROCYTE HOMEOSTASIS                                                                     | 7  | 1.33994  | 0.0140047 | 1.85372619  |
| GO HOMOLOGOUS RECOMBINATION                                                                    | 5  | 0.618435 | 0.0141952 | 1.847858484 |
| GO REGULATION OF MONOOXYGENASE ACTIVITY                                                        | 5  | 0.618435 | 0.0141952 | 1.847858484 |
| GO REGULATION OF RESPONSE TO WOUNDING                                                          | 8  | 1.77514  | 0.014413  | 1.841245613 |
| GO TISSUE REMODELING                                                                           | 8  | 1.77514  | 0.014413  | 1.841245613 |
| GO MYOBLAST DIFFERENTIATION                                                                    | 6  | 0.96201  | 0.0145147 | 1.838191936 |
| GO MITOTIC G2 M TRANSITION CHECKPOINT                                                          | 4  | 0.343575 | 0.0147676 | 1.83069008  |
| GO NEGATIVE REGULATION OF MACROAUTOPHAGY                                                       | 4  | 0.343575 | 0.0147676 | 1.83069008  |
| GO REGULATION OF FATTY ACID OXIDATION                                                          | 4  | 0.343575 | 0.0147676 | 1.83069008  |
| GO RESPONSE TO ARSENIC CONTAINING SUBSTANCE                                                    | 4  | 0.343575 | 0.0147676 | 1.83069008  |
| GO CELL ACTIVATION INVOLVED IN IMMUNE RESPONSE                                                 | 19 | 8.0282   | 0.0148647 | 1.827843851 |
| GO PRESYNAPTIC ENDOCYTOSIS                                                                     | 5  | 0.629887 | 0.0151868 | 1.818533726 |
| GO PHOSPHOLIPID EFFLUX                                                                         | 3  | 0.13743  | 0.0152221 | 1.817525429 |
| GO POSITIVE REGULATION OF INTERLEUKIN 6 BIOSYNTHETIC PROCESS                                   | 3  | 0.13743  | 0.0152221 | 1.817525429 |
| GO REGULATION OF LYSOSOMAL LUMEN PH                                                            | 3  | 0.13743  | 0.0152221 | 1.817525429 |
| GO NEUTRAL LIPID METABOLIC PROCESS                                                             | 7  | 1.3743   | 0.0158454 | 1.800096793 |
| GO POSITIVE REGULATION OF PROTEIN LOCALIZATION TO MEMBRANE                                     | 7  | 1.3743   | 0.0158454 | 1.800096793 |
| GO SYNAPTIC VESICLE EXOCYTOSIS                                                                 | 7  | 1.3743   | 0.0158454 | 1.800096793 |
| GO REGULATION OF STEROID BIOSYNTHETIC PROCESS                                                  | 6  | 0.984915 | 0.0160747 | 1.793857124 |
| GO ANION HOMEOSTASIS                                                                           | 5  | 0.64134  | 0.0161885 | 1.79079339  |
| GO POSITIVE REGULATION OF INTRINSIC APOPTOTIC SIGNALING PATHWAY                                | 5  | 0.64134  | 0.0161885 | 1.79079339  |
| GO REGULATION OF CELL CYCLE PHASE TRANSITION                                                   | 14 | 4.98184  | 0.0161885 | 1.79079339  |
| GO SECOND MESSENGER MEDIATED SIGNALING                                                         | 14 | 4.98184  | 0.0161885 | 1.79079339  |
| GO G2 DNA DAMAGE CHECKPOINT                                                                    | 4  | 0.355027 | 0.0162106 | 1.79020091  |
| GO POSITIVE REGULATION OF DOUBLE STRAND BREAK REPAIR                                           | 4  | 0.355027 | 0.0162106 | 1.79020091  |
| GO REGULATION OF GLIAL CELL PROLIFERATION                                                      | 4  | 0.355027 | 0.0162106 | 1.79020091  |
| GO VASODILATION                                                                                | 4  | 0.355027 | 0.0162106 | 1.79020091  |
| GO NEGATIVE REGULATION OF PEPTIDASE ACTIVITY                                                   | 10 | 2.78296  | 0.0163741 | 1.785842562 |

|                                                                                               |    |          |           |             |
|-----------------------------------------------------------------------------------------------|----|----------|-----------|-------------|
| GO ESTABLISHMENT OF ORGANELLE LOCALIZATION                                                    | 15 | 5.61172  | 0.0170725 | 1.767702879 |
| GO REGULATION OF CELL CYCLE G1 S PHASE TRANSITION                                             | 8  | 1.8324   | 0.0170927 | 1.76718933  |
| GO RESPONSE TO BIOTIC STIMULUS                                                                | 23 | 10.8455  | 0.0172316 | 1.763674395 |
| GO POSITIVE REGULATION OF BLOOD VESSEL DIAMETER                                               | 5  | 0.652792 | 0.0172728 | 1.762637256 |
| GO ACTIVATION OF PROTEIN KINASE B ACTIVITY                                                    | 4  | 0.36648  | 0.0178556 | 1.748225552 |
| GO CELLULAR RESPONSE TO DEXAMETHASONE STIMULUS                                                | 4  | 0.36648  | 0.0178556 | 1.748225552 |
| GO POSITIVE REGULATION OF LEUKOCYTE MIGRATION                                                 | 7  | 1.40866  | 0.0178556 | 1.748225552 |
| GO PROTEIN LIPID COMPLEX ASSEMBLY                                                             | 4  | 0.36648  | 0.0178556 | 1.748225552 |
| GO REGULATION OF ENDOPLASMIC RETICULUM STRESS INDUCED INTRINSIC APOPTOTIC SIGNALING PATHWAY   | 4  | 0.36648  | 0.0178556 | 1.748225552 |
| GO REPLICATION FORK PROCESSING                                                                | 4  | 0.36648  | 0.0178556 | 1.748225552 |
| GO HYDROGEN PEROXIDE METABOLIC PROCESS                                                        | 3  | 0.148882 | 0.0180246 | 1.744134364 |
| GO MYELOID LEUKOCYTE MEDIATED IMMUNITY                                                        | 16 | 6.26452  | 0.0180246 | 1.744134364 |
| GO POSITIVE REGULATION OF EXECUTION PHASE OF APOPTOSIS                                        | 3  | 0.148882 | 0.0180246 | 1.744134364 |
| GO REGULATION OF METALLOPEPTIDASE ACTIVITY                                                    | 3  | 0.148882 | 0.0180246 | 1.744134364 |
| GO NEUROTRANSMITTER BIOSYNTHETIC PROCESS                                                      | 6  | 1.01927  | 0.0185251 | 1.732239439 |
| GO NEUROTRANSMITTER METABOLIC PROCESS                                                         | 7  | 1.42011  | 0.0185251 | 1.732239439 |
| GO PEPTIDE HORMONE SECRETION                                                                  | 10 | 2.84022  | 0.0186762 | 1.728711484 |
| GO NEGATIVE REGULATION OF MAPK CASCADE                                                        | 8  | 1.86676  | 0.0188531 | 1.724617229 |
| GO CARDIAC MUSCLE TISSUE DEVELOPMENT                                                          | 9  | 2.34776  | 0.0191892 | 1.716943131 |
| GO ACYLGlycerol HOMEOSTASIS                                                                   | 4  | 0.377932 | 0.0194188 | 1.711777611 |
| GO LIVER REGENERATION                                                                         | 4  | 0.377932 | 0.0194188 | 1.711777611 |
| GO LONG TERM MEMORY                                                                           | 4  | 0.377932 | 0.0194188 | 1.711777611 |
| GO MULTICELLULAR ORGANISM REPRODUCTION                                                        | 21 | 9.58574  | 0.0194188 | 1.711777611 |
| GO NEGATIVE REGULATION OF EXOCYTOSIS                                                          | 4  | 0.377932 | 0.0194188 | 1.711777611 |
| GO NEGATIVE REGULATION OF GENE SILENCING                                                      | 4  | 0.377932 | 0.0194188 | 1.711777611 |
| GO POSITIVE REGULATION OF MULTICELLULAR ORGANISM GROWTH                                       | 4  | 0.377932 | 0.0194188 | 1.711777611 |
| GO POSITIVE REGULATION OF PROTEIN KINASE B SIGNALING                                          | 8  | 1.87821  | 0.0194188 | 1.711777611 |
| GO POSITIVE REGULATION OF TRANSCRIPTION FROM RNA POLYMERASE II PROMOTER IN RESPONSE TO STRESS | 4  | 0.377932 | 0.0194188 | 1.711777611 |
| GO REGULATION OF PEPTIDYL LYSINE ACETYLTATION                                                 | 5  | 0.675697 | 0.0194188 | 1.711777611 |
| GO RESPONSE TO MINERALOCORTICOID                                                              | 4  | 0.377932 | 0.0194188 | 1.711777611 |
| GO RESPONSE TO BACTERIUM                                                                      | 17 | 6.96312  | 0.0196875 | 1.705809429 |
| GO CELL CYCLE G1 S PHASE TRANSITION                                                           | 10 | 2.88603  | 0.0206647 | 1.684770895 |
| GO POSITIVE REGULATION OF RESPONSE TO WOUNDING                                                | 5  | 0.68715  | 0.0207331 | 1.683335758 |
| GO RESPONSE TO ETHANOL                                                                        | 7  | 1.45447  | 0.0207331 | 1.683335758 |
| GO RIBONUCLEOSIDE TRIPHOSPHATE BIOSYNTHETIC PROCESS                                           | 5  | 0.68715  | 0.0207331 | 1.683335758 |
| GO GLIAL CELL APOPTOTIC PROCESS                                                               | 3  | 0.160335 | 0.0210309 | 1.677142142 |
| GO LOW DENSITY LIPOPROTEIN PARTICLE REMODELING                                                | 3  | 0.160335 | 0.0210309 | 1.677142142 |
| GO MODULATION BY HOST OF VIRAL GENOME REPLICATION                                             | 3  | 0.160335 | 0.0210309 | 1.677142142 |
| GO NEGATIVE REGULATION OF POSTTRANSCRIPTIONAL GENE SILENCING                                  | 3  | 0.160335 | 0.0210309 | 1.677142142 |
| GO POSITIVE REGULATION OF OXIDATIVE STRESS INDUCED CELL DEATH                                 | 3  | 0.160335 | 0.0210309 | 1.677142142 |
| GO POSITIVE REGULATION OF TUMOR NECROSIS FACTOR BIOSYNTHETIC PROCESS                          | 3  | 0.160335 | 0.0210309 | 1.677142142 |
| GO REGULATION OF HELICASE ACTIVITY                                                            | 3  | 0.160335 | 0.0210309 | 1.677142142 |
| GO REGULATION OF LONG TERM SYNAPTIC DEPRESSION                                                | 3  | 0.160335 | 0.0210309 | 1.677142142 |
| GO REGULATION OF AUTOPHAGOSOME ASSEMBLY                                                       | 4  | 0.389385 | 0.0211837 | 1.673998183 |
| GO CELLULAR RESPONSE TO XENOBIOTIC STIMULUS                                                   | 8  | 1.91257  | 0.0212812 | 1.672003887 |

|                                                                         |    |          |           |             |
|-------------------------------------------------------------------------|----|----------|-----------|-------------|
| GO NUCLEAR CHROMOSOME SEGREGATION                                       | 10 | 2.90893  | 0.0215688 | 1.666174017 |
| GO POSITIVE REGULATION OF CYTOKINE BIOSYNTHETIC PROCESS                 | 5  | 0.698602 | 0.0219441 | 1.658682226 |
| GO ANTIBIOTIC METABOLIC PROCESS                                         | 6  | 1.06508  | 0.0221765 | 1.654106995 |
| GO POSITIVE REGULATION OF CELL CYCLE PHASE TRANSITION                   | 6  | 1.06508  | 0.0221765 | 1.654106995 |
| GO REGULATION OF ANION TRANSPORT                                        | 6  | 1.06508  | 0.0221765 | 1.654106995 |
| GO CELLULAR RESPONSE TO ALKALOID                                        | 4  | 0.400837 | 0.0231495 | 1.635458385 |
| GO FOAM CELL DIFFERENTIATION                                            | 4  | 0.400837 | 0.0231495 | 1.635458385 |
| GO NEURON CELLULAR HOMEOSTASIS                                          | 4  | 0.400837 | 0.0231495 | 1.635458385 |
| GO STRIATED MUSCLE CELL APOPTOTIC PROCESS                               | 4  | 0.400837 | 0.0231495 | 1.635458385 |
| GO MODIFICATION DEPENDENT MACROMOLECULE CATABOLIC PROCESS               | 17 | 7.0891   | 0.0232227 | 1.634087288 |
| GO AUTOPHAGOSOME ORGANIZATION                                           | 6  | 1.07653  | 0.0232245 | 1.634053627 |
| GO FEMALE GAMETE GENERATION                                             | 7  | 1.50028  | 0.0240522 | 1.618845194 |
| GO POSITIVE REGULATION OF ENDOCYTOSIS                                   | 6  | 1.08799  | 0.0244102 | 1.612428662 |
| GO FATTY ACID HOMEOSTASIS                                               | 3  | 0.171787 | 0.0245282 | 1.610334321 |
| GO HIGH DENSITY LIPOPROTEIN PARTICLE ASSEMBLY                           | 3  | 0.171787 | 0.0245282 | 1.610334321 |
| GO RESPONSE TO POTASSIUM ION                                            | 3  | 0.171787 | 0.0245282 | 1.610334321 |
| GO RESPONSE TO STIMULUS INVOLVED IN REGULATION OF MUSCLE ADAPTATION     | 3  | 0.171787 | 0.0245282 | 1.610334321 |
| GO REGULATION OF HEART GROWTH                                           | 5  | 0.721507 | 0.0247109 | 1.607111437 |
| GO REGULATION OF CELLULAR KETONE METABOLIC PROCESS                      | 7  | 1.51173  | 0.0249047 | 1.603718685 |
| GO NEGATIVE REGULATION OF MULTI ORGANISM PROCESS                        | 8  | 1.96983  | 0.0249939 | 1.602165972 |
| GO CELLULAR RESPONSE TO CADMIUM ION                                     | 4  | 0.41229  | 0.0250711 | 1.600826611 |
| GO INSULIN LIKE GROWTH FACTOR RECEPTOR SIGNALING PATHWAY                | 4  | 0.41229  | 0.0250711 | 1.600826611 |
| GO NEGATIVE REGULATION OF ENDOTHELIAL CELL PROLIFERATION                | 4  | 0.41229  | 0.0250711 | 1.600826611 |
| GO REGULATION OF COFACTOR METABOLIC PROCESS                             | 4  | 0.41229  | 0.0250711 | 1.600826611 |
| GO SKELETAL MUSCLE TISSUE REGENERATION                                  | 4  | 0.41229  | 0.0250711 | 1.600826611 |
| GO ORGANELLE LOCALIZATION                                               | 18 | 7.8106   | 0.0252529 | 1.597688741 |
| GO POSITIVE REGULATION OF COLD INDUCED THERMOGENESIS                    | 6  | 1.09944  | 0.0253213 | 1.596514001 |
| GO INTERSPECIES INTERACTION BETWEEN ORGANISMS                           | 22 | 10.5363  | 0.025449  | 1.594329278 |
| GO CELL MATURATION                                                      | 8  | 1.98128  | 0.0256584 | 1.590770429 |
| GO REGULATION OF RECEPTOR SIGNALING PATHWAY VIA STAT                    | 7  | 1.52318  | 0.0256723 | 1.590535221 |
| GO REGULATION OF LEUKOCYTE PROLIFERATION                                | 9  | 2.47374  | 0.0257035 | 1.590007736 |
| GO CELLULAR RESPONSE TO CORTICOSTEROID STIMULUS                         | 5  | 0.73296  | 0.0260175 | 1.584734437 |
| GO REGULATION OF STRIATED MUSCLE CELL DIFFERENTIATION                   | 6  | 1.11089  | 0.0264727 | 1.577201762 |
| GO POSITIVE REGULATION OF ION TRANSPORT                                 | 10 | 3.01201  | 0.0268399 | 1.571219107 |
| GO TUBE MORPHOGENESIS                                                   | 20 | 9.20781  | 0.0269318 | 1.569734619 |
| GO POSITIVE REGULATION OF HEART GROWTH                                  | 4  | 0.423742 | 0.0271976 | 1.565469418 |
| GO POSITIVE REGULATION OF TELOMERE MAINTENANCE VIA TELOMERE LENGTHENING | 4  | 0.423742 | 0.0271976 | 1.565469418 |
| GO ORGAN GROWTH                                                         | 8  | 2.00419  | 0.0272772 | 1.564200212 |
| GO AXO DENDRITIC TRANSPORT                                              | 5  | 0.744412 | 0.0275366 | 1.560089684 |
| GO COFACTOR CATABOLIC PROCESS                                           | 5  | 0.744412 | 0.0275366 | 1.560089684 |
| GO CATECHOLAMINE UPTAKE                                                 | 3  | 0.18324  | 0.0279751 | 1.553228352 |
| GO CELL CYCLE G2 M PHASE TRANSITION                                     | 10 | 3.03491  | 0.0279751 | 1.553228352 |
| GO POSITIVE REGULATION OF GLIAL CELL PROLIFERATION                      | 3  | 0.18324  | 0.0279751 | 1.553228352 |
| GO REGULATION OF CAMP DEPENDENT PROTEIN KINASE ACTIVITY                 | 3  | 0.18324  | 0.0279751 | 1.553228352 |
| GO REGULATION OF INCLUSION BODY ASSEMBLY                                | 3  | 0.18324  | 0.0279751 | 1.553228352 |

|                                                                          |    |           |           |             |
|--------------------------------------------------------------------------|----|-----------|-----------|-------------|
| GO REGULATION OF MITOPHAGY                                               | 3  | 0.18324   | 0.0279751 | 1.553228352 |
| GO REGULATION OF NUCLEAR CELL CYCLE DNA REPLICATION                      | 3  | 0.18324   | 0.0279751 | 1.553228352 |
| GO RESPONSE TO EPINEPHRINE                                               | 3  | 0.18324   | 0.0279751 | 1.553228352 |
| GO REGULATION OF RESPONSE TO BIOTIC STIMULUS                             | 7  | 1.55754   | 0.0284496 | 1.545923835 |
| GO REGULATION OF TUBE SIZE                                               | 7  | 1.55754   | 0.0284496 | 1.545923835 |
| GO REGULATION OF INFLAMMATORY RESPONSE TO WOUNDING                       | 2  | 0.0343575 | 0.0286711 | 1.542555645 |
| GO POSITIVE REGULATION OF DNA BIOSYNTHETIC PROCESS                       | 5  | 0.755865  | 0.0289971 | 1.537645434 |
| GO NEGATIVE REGULATION OF INSULIN SECRETION                              | 4  | 0.435195  | 0.0292257 | 1.534235078 |
| GO POSITIVE REGULATION OF SIGNALING RECEPTOR ACTIVITY                    | 4  | 0.435195  | 0.0292257 | 1.534235078 |
| GO REGULATION OF PROTEIN LOCALIZATION TO CELL SURFACE                    | 4  | 0.435195  | 0.0292257 | 1.534235078 |
| GO RESPONSE TO FOOD                                                      | 4  | 0.435195  | 0.0292257 | 1.534235078 |
| GO INTERLEUKIN 6 PRODUCTION                                              | 7  | 1.56899   | 0.0293827 | 1.531908299 |
| GO REGULATION OF PEPTIDYL SERINE PHOSPHORYLATION                         | 7  | 1.56899   | 0.0293827 | 1.531908299 |
| GO T CELL PROLIFERATION                                                  | 8  | 2.03854   | 0.0296236 | 1.528362165 |
| GO NEGATIVE REGULATION OF LOCOMOTION                                     | 11 | 3.61899   | 0.0298494 | 1.525064394 |
| GO NEGATIVE REGULATION OF PROTEIN BINDING                                | 6  | 1.14525   | 0.0298494 | 1.525064394 |
| GO MULTI ORGANISM REPRODUCTIVE PROCESS                                   | 23 | 11.4181   | 0.0301315 | 1.520979248 |
| GO POSITIVE REGULATION OF TYROSINE PHOSPHORYLATION OF STAT PROTEIN       | 5  | 0.767317  | 0.0304466 | 1.516461198 |
| GO REGULATION OF BEHAVIOR                                                | 5  | 0.767317  | 0.0304466 | 1.516461198 |
| GO REGULATION OF CELLULAR RESPONSE TO INSULIN STIMULUS                   | 5  | 0.767317  | 0.0304466 | 1.516461198 |
| GO SYNAPTIC VESICLE RECYCLING                                            | 5  | 0.767317  | 0.0304466 | 1.516461198 |
| GO NEGATIVE REGULATION OF CELL MOTILITY                                  | 10 | 3.08072   | 0.0305393 | 1.515140922 |
| GO POSITIVE REGULATION OF NEUROTRANSMITTER TRANSPORT                     | 4  | 0.446647  | 0.0315271 | 1.501315976 |
| GO TORC1 SIGNALING                                                       | 4  | 0.446647  | 0.0315271 | 1.501315976 |
| GO HORMONE TRANSPORT                                                     | 11 | 3.65335   | 0.0317897 | 1.497713571 |
| GO MYOBLAST PROLIFERATION                                                | 3  | 0.194692  | 0.0317982 | 1.497597463 |
| GO POSITIVE REGULATION OF CIRCADIAN RHYTHM                               | 3  | 0.194692  | 0.0317982 | 1.497597463 |
| GO REGULATION OF CELL GROWTH INVOLVED IN CARDIAC MUSCLE CELL DEVELOPMENT | 3  | 0.194692  | 0.0317982 | 1.497597463 |
| GO REGULATION OF TRANSMISSION OF NERVE IMPULSE                           | 3  | 0.194692  | 0.0317982 | 1.497597463 |
| GO CELLULAR PROTEIN CONTAINING COMPLEX ASSEMBLY                          | 24 | 12.2084   | 0.0322137 | 1.49195939  |
| GO FEEDING BEHAVIOR                                                      | 6  | 1.16815   | 0.0323768 | 1.489766077 |
| GO REGULATION OF STRESS ACTIVATED PROTEIN KINASE SIGNALING CASCADE       | 9  | 2.58826   | 0.0331738 | 1.479204778 |
| GO PROTEIN IMPORT                                                        | 8  | 2.08435   | 0.0332743 | 1.477891072 |
| GO NEGATIVE REGULATION OF CELL CYCLE G1 S PHASE TRANSITION               | 6  | 1.17961   | 0.0338445 | 1.470511898 |
| GO MACROPHAGE DIFFERENTIATION                                            | 4  | 0.4581    | 0.0340031 | 1.468481487 |
| GO DEVELOPMENTAL GROWTH INVOLVED IN MORPHOGENESIS                        | 9  | 2.59972   | 0.0340229 | 1.468228671 |
| GO LEARNING                                                              | 7  | 1.62625   | 0.0348889 | 1.457312723 |
| GO REGULATION OF CALCIUM ION TRANSMEMBRANE TRANSPORT                     | 7  | 1.62625   | 0.0348889 | 1.457312723 |
| GO CATION TRANSMEMBRANE TRANSPORT                                        | 20 | 9.45976   | 0.0350719 | 1.455040706 |
| GO SEXUAL REPRODUCTION                                                   | 20 | 9.48267   | 0.0360249 | 1.443397216 |
| GO HEAD DEVELOPMENT                                                      | 19 | 8.79552   | 0.0360484 | 1.443114007 |
| GO CELLULAR RESPONSE TO ARSENIC CONTAINING SUBSTANCE                     | 3  | 0.206145  | 0.0360754 | 1.442788845 |
| GO HISTONE H3 DEACETYLATION                                              | 3  | 0.206145  | 0.0360754 | 1.442788845 |
| GO NEGATIVE REGULATION OF VASCULAR SMOOTH MUSCLE CELL PROLIFERATION      | 3  | 0.206145  | 0.0360754 | 1.442788845 |
| GO REGULATION OF DEFENSE RESPONSE TO BACTERIUM                           | 3  | 0.206145  | 0.0360754 | 1.442788845 |

|                                                                                                 |    |          |           |             |
|-------------------------------------------------------------------------------------------------|----|----------|-----------|-------------|
| GO RESOLUTION OF MEIOTIC RECOMBINATION INTERMEDIATES                                            | 3  | 0.206145 | 0.0360754 | 1.442788845 |
| GO RESPONSE TO UV B                                                                             | 3  | 0.206145 | 0.0360754 | 1.442788845 |
| GO STRESS GRANULE ASSEMBLY                                                                      | 3  | 0.206145 | 0.0360754 | 1.442788845 |
| GO TRANSCYTOSIS                                                                                 | 3  | 0.206145 | 0.0360754 | 1.442788845 |
| GO MEIOTIC CELL CYCLE PROCESS                                                                   | 8  | 2.11871  | 0.036129  | 1.442144059 |
| GO NEGATIVE REGULATION OF LIPID LOCALIZATION                                                    | 4  | 0.469552 | 0.036349  | 1.439507533 |
| GO POSITIVE REGULATION OF DENDRITIC SPINE DEVELOPMENT                                           | 4  | 0.469552 | 0.036349  | 1.439507533 |
| GO TRIGLYCERIDE METABOLIC PROCESS                                                               | 4  | 0.469552 | 0.036349  | 1.439507533 |
| GO LEUKOCYTE APOPTOTIC PROCESS                                                                  | 6  | 1.20251  | 0.0363556 | 1.439428684 |
| GO MITOTIC DNA INTEGRITY CHECKPOINT                                                             | 6  | 1.20251  | 0.0363556 | 1.439428684 |
| GO POSITIVE REGULATION OF PEPTIDYL SERINE PHOSPHORYLATION                                       | 6  | 1.20251  | 0.0363556 | 1.439428684 |
| GO NEGATIVE REGULATION OF CELL ACTIVATION                                                       | 8  | 2.13016  | 0.037072  | 1.430953984 |
| GO RESPONSE TO AXON INJURY                                                                      | 5  | 0.813127 | 0.0373823 | 1.427333982 |
| GO FOREBRAIN DEVELOPMENT                                                                        | 12 | 4.3405   | 0.0380365 | 1.419799452 |
| GO ADIPOSE TISSUE DEVELOPMENT                                                                   | 4  | 0.481005 | 0.039121  | 1.407590052 |
| GO CELLULAR RESPONSE TO GLUCOSE STARVATION                                                      | 4  | 0.481005 | 0.039121  | 1.407590052 |
| GO DNA DEPENDENT DNA REPLICATION MAINTENANCE OF FIDELITY                                        | 4  | 0.481005 | 0.039121  | 1.407590052 |
| GO NUCLEOSIDE TRIPHOSPHATE BIOSYNTHETIC PROCESS                                                 | 5  | 0.82458  | 0.0394259 | 1.404218384 |
| GO MYOFIBROBLAST DIFFERENTIATION                                                                | 2  | 0.04581  | 0.0401628 | 1.396176017 |
| GO NEGATIVE REGULATION OF METALLOENDOPEPTIDASE ACTIVITY                                         | 2  | 0.04581  | 0.0401628 | 1.396176017 |
| GO POSITIVE REGULATION OF DNA CATABOLIC PROCESS                                                 | 2  | 0.04581  | 0.0401628 | 1.396176017 |
| GO REGULATION OF MYOFIBROBLAST DIFFERENTIATION                                                  | 2  | 0.04581  | 0.0401628 | 1.396176017 |
| GO REGULATION OF SUPEROXIDE DISMUTASE ACTIVITY                                                  | 2  | 0.04581  | 0.0401628 | 1.396176017 |
| GO NOTCH SIGNALING PATHWAY                                                                      | 8  | 2.16452  | 0.0403526 | 1.394128478 |
| GO DENDRITIC SPINE MAINTENANCE                                                                  | 3  | 0.217597 | 0.0404048 | 1.393567039 |
| GO NEGATIVE REGULATION OF CHEMOKINE PRODUCTION                                                  | 3  | 0.217597 | 0.0404048 | 1.393567039 |
| GO NEGATIVE REGULATION OF OXIDATIVE STRESS INDUCED NEURON DEATH                                 | 3  | 0.217597 | 0.0404048 | 1.393567039 |
| GO NEGATIVE REGULATION OF TISSUE REMODELING                                                     | 3  | 0.217597 | 0.0404048 | 1.393567039 |
| GO POSITIVE REGULATION OF MACROPHAGE MIGRATION                                                  | 3  | 0.217597 | 0.0404048 | 1.393567039 |
| GO REGULATION OF RESPONSE TO FOOD                                                               | 3  | 0.217597 | 0.0404048 | 1.393567039 |
| GO MODIFICATION OF MORPHOLOGY OR PHYSIOLOGY OF OTHER ORGANISM INVOLVED IN SYMBIOTIC INTERACTION | 6  | 1.23687  | 0.0407758 | 1.38959751  |
| GO RAS PROTEIN SIGNAL TRANSDUCTION                                                              | 13 | 4.99329  | 0.0407758 | 1.38959751  |
| GO REGULATION OF SYNAPSE ASSEMBLY                                                               | 6  | 1.23687  | 0.0407758 | 1.38959751  |
| GO NEGATIVE REGULATION OF CELL CYCLE PHASE TRANSITION                                           | 9  | 2.69134  | 0.0409954 | 1.387264872 |
| GO NEGATIVE REGULATION OF DNA RECOMBINATION                                                     | 4  | 0.492457 | 0.0415486 | 1.381443605 |
| GO PHENOL CONTAINING COMPOUND BIOSYNTHETIC PROCESS                                              | 4  | 0.492457 | 0.0415486 | 1.381443605 |
| GO RESPONSE TO ISCHEMIA                                                                         | 4  | 0.492457 | 0.0415486 | 1.381443605 |
| GO RHYTHMIC BEHAVIOR                                                                            | 4  | 0.492457 | 0.0415486 | 1.381443605 |
| GO PLACENTA DEVELOPMENT                                                                         | 7  | 1.69497  | 0.0417729 | 1.379105374 |
| GO REGULATION OF GENE SILENCING                                                                 | 7  | 1.69497  | 0.0417729 | 1.379105374 |
| GO RESPONSE TO MOLECULE OF BACTERIAL ORIGIN                                                     | 11 | 3.82513  | 0.0425149 | 1.371458838 |
| GO POSITIVE REGULATION OF CYTOKINE PRODUCTION                                                   | 13 | 5.0391   | 0.0436462 | 1.360053562 |
| GO REGULATION OF PROTEIN LOCALIZATION TO CELL PERIPHERY                                         | 6  | 1.25977  | 0.0441132 | 1.355431437 |
| GO NEGATIVE REGULATION OF RESPONSE TO ENDOPLASMIC RETICULUM STRESS                              | 4  | 0.50391  | 0.0445932 | 1.350731362 |
| GO NEGATIVE REGULATION OF STRESS ACTIVATED PROTEIN KINASE SIGNALING CASCADE                     | 4  | 0.50391  | 0.0445932 | 1.350731362 |



|                                                                                                      |    |          |           |             |
|------------------------------------------------------------------------------------------------------|----|----------|-----------|-------------|
| GO POSITIVE REGULATION OF CARDIAC MUSCLE TISSUE DEVELOPMENT                                          | 4  | 0.50391  | 0.0445932 | 1.350731362 |
| GO CELL MORPHOGENESIS INVOLVED IN DIFFERENTIATION                                                    | 18 | 8.32597  | 0.0449725 | 1.34705297  |
| GO DRUG METABOLIC PROCESS                                                                            | 11 | 3.85949  | 0.0451427 | 1.345412469 |
| GO NEGATIVE REGULATION OF ENDOPLASMIC RETICULUM STRESS INDUCED INTRINSIC APOPTOTIC SIGNALING PATHWAY | 3  | 0.22905  | 0.0451427 | 1.345412469 |
| GO NEGATIVE REGULATION OF NUCLEOCYTOPLASMIC TRANSPORT                                                | 3  | 0.22905  | 0.0451427 | 1.345412469 |
| GO REGULATION OF PRODUCTION OF SMALL RNA INVOLVED IN GENE SILENCING BY RNA                           | 3  | 0.22905  | 0.0451427 | 1.345412469 |
| GO SMALL GTPASE MEDIATED SIGNAL TRANSDUCTION                                                         | 15 | 6.33323  | 0.0451427 | 1.345412469 |
| GO PERIPHERAL NERVOUS SYSTEM DEVELOPMENT                                                             | 5  | 0.858937 | 0.0451455 | 1.345385533 |
| GO REGULATION OF IMMUNE EFFECTOR PROCESS                                                             | 12 | 4.45502  | 0.0451455 | 1.345385533 |
| GO BLOOD VESSEL ENDOTHELIAL CELL MIGRATION                                                           | 6  | 1.28268  | 0.0475513 | 1.322837605 |
| GO NEGATIVE REGULATION OF PEPTIDE HORMONE SECRETION                                                  | 4  | 0.515362 | 0.0476426 | 1.322004546 |
| GO REGULATION OF ERYTHROCYTE DIFFERENTIATION                                                         | 4  | 0.515362 | 0.0476426 | 1.322004546 |
| GO CELL PART MORPHOGENESIS                                                                           | 17 | 7.70753  | 0.0481234 | 1.317643697 |
| GO RECEPTOR SIGNALING PATHWAY VIA STAT                                                               | 7  | 1.75223  | 0.0491014 | 1.308906125 |
| GO CELLULAR COMPONENT MORPHOGENESIS                                                                  | 24 | 12.7008  | 0.0498446 | 1.302381885 |
| GO ADULT LOCOMOTORY BEHAVIOR                                                                         | 5  | 0.881842 | 0.0499658 | 1.301327155 |
